# Supplementary material
Source: publisher figshare collection journal article supplement (https://gsapubs.figshare.com/ndownloader/files/23297084)
Supplement: Supplementary file 1 [file 23297084]

Archive with 2 entries (2 files):
- 2014123-tables.xlsx
- 2014123-text_and_refs.pdf
