# Supplementary material
Source: publisher figshare collection journal article supplement (https://gsapubs.figshare.com/ndownloader/files/23297084)
Supplement: Supplementary file 1 [file 23297084 › 2014123-tables.xlsx]

## Sheet: TABLE DR1 slab modes
GSA Data Repository Item 2014123 accompanies Gastil, R.G., Kimbrough, D.L., Kimbrough, J.M., Grove, M., and Shimizu, M., 2014,
The Sierra San Pedro Mártir zoned pluton, Baja California, Mexico, in Morton, D.M., and Miller, F.K., eds., Peninsular Ranges Batholith,
Baja California and Southern California: Geological Society of America Memoir 211, p. 739–758, https://doi.org/10.1130/2014.1211(24).
TABLE DR1. MODAL MINERALOGY DETERMINED FROM STAINED SLABS WITH SAMPLE LOCATIONS AND MAGNETIC SUSCEPTIBILITY
Sample	Zone	Chem*	Latitude	Longitude	Margin (km)†	Mag susc§ x10-5	Plag	Qtz	Kspar	Mafics = CI#	Musc	PlagN**	QtzN**	KsparN**
A2.5	hb	x	30.9766	-115.612	0	25	41	28	5	26	0	55.4054	37.8378	6.75676
C3.1	hb	x	30.9634	-115.609	0.2	22	46	30	6	18	0	56.0976	36.5854	7.31707
C4.2	hb	x	30.9608	-115.603	1	415	50	29	3	18	0	60.9756	35.3659	3.65854
B4.7	hb		30.967	-115.592	2	645	57	29	2	12	0	64.7727	32.9545	2.27273
B5.9	hb	x	30.967	-115.594	1.8	590	51	29	4	16	0	60.7143	34.5238	4.7619
A7.2	hb	x	30.972	-115.586	2.5	570	53	30	3	14	0	61.6279	34.8837	3.48837
B8	hb	x	30.9655	-115.583	2.9	250	51	28	2	19	0	62.963	34.5679	2.46914
B9	hb	x	30.9704	-115.577	3.3	750	53	28	2	17	0	63.8554	33.7349	2.40964
W10.5	hb	x	30.9976	-115.569	3	775	48	30	4	18	0	58.5366	36.5854	4.87805
W11.5	hb	x	30.9975	-115.563	3.6	600	52	29	4	15	0	61.1765	34.1176	4.70588
G12.8	hb		31	-115.556	4.1	730	59	19	2	20	0	73.75	23.75	2.5
H13	hb	x	30.9924	-115.558	4.3	450	57	27	3	13	0	65.5172	31.0345	3.44828
G14	hb		30.992	-115.551	4.9	555	56	30	3	11	0	62.9213	33.7079	3.37079
H14.5	dike		30.994	-115.546	5.2	420	58	23	2	17	0	69.8795	27.7108	2.40964
L14.8	hb	x	30.9821	-115.554	5	325	48	29	11	12	0	54.5455	32.9545	12.5
G15	hb		30.99	-115.547	5.3	160	47	28	4	21	0	59.4937	35.443	5.06329
I15.9	hb	x	30.9796	-115.543	6	290	53	31	2	14	0	61.6279	36.0465	2.32558
H16	hb	x	30.9832	-115.546	5.7	20	49	34	2	15	0	57.6471	40	2.35294
J17	hb		30.973	-115.549	5.7	25	54	29	5	12	0	61.3636	32.9545	5.68182
G18	hb	x	30.9816	-115.534	6.8	30	46	37	6	11	0	51.6854	41.573	6.74157
E19	hb	x	30.986	-115.523	7.6	310	53	24	9	14	0	61.6279	27.907	10.4651
G20	hb		30.976	-115.526	7.7	20	53	27	9	11	0	59.5506	30.3371	10.1124
E20.8	hb		30.981	-115.515	8.3	40	53	26	2	19	0	65.4321	32.0988	2.46914
G21	biot	x	30.9738	-115.522	8.1	340	54	28	4	14	0	62.7907	32.5581	4.65116
G23	biot	x	30.9685	-115.514	9	210	N.D.††	N.D.††	N.D.††	N.D.††	N.D.††	N.D.††	N.D.††	N.D.††
G23.5	biot	x	30.961	-115.511	9.6	200	53	33	4	10	0	58.8889	36.6667	4.44444
H24	biot	x	30.9614	-115.512	9.6	200	50	32	7	11	0	56.1798	35.9551	7.86517
G24.3	biot		30.966	-115.507	9.8	300	54	28	7	11	0	60.6742	31.4607	7.86517
E25	biot		30.97	-115.498	10.4	200	51	30	6	13	0	58.6207	34.4828	6.89655
G26	biot		30.961	-115.501	10.4	140	50	36	4	10	0	55.5556	40	4.44444
E26	biot	x	30.967	-115.495	10.8	210	50	30	7	13	0	57.4713	34.4828	8.04598
H26	aplite dike	x	30.9562	-115.506	10.1	40	35	29	24	12	0	39.7727	32.9545	27.2727
G28	biot	x	30.9552	-115.492	11.5	310	52	26	9	13	0	59.7701	29.8851	10.3448
H28	biot	x	30.9515	-115.496	11.3	200	49	32	13	6	0	52.1277	34.0426	13.8298
G29	musc	x	30.9524	-115.487	12	14	46	35	10	9	0	50.5495	38.4615	10.989
H29.5	musc		30.949	-115.488	12	10	46	36	11	7	0	49.4624	38.7097	11.828
I30.8	musc	x	30.9404	-115.487	12.4	7	46	36	11	7	0	49.4624	38.7097	11.828
G30.4	musc		30.949	-115.482	12.5	11	51	31	11	7	0	54.8387	33.3333	11.828
E31	musc		30.955	-115.473	13.3	9	51	34	8	7	0	54.8387	36.5591	8.60215
J32	musc		30.934	-115.484	12.6	4	48	33	9	10	0	53.3333	36.6667	10
I32	musc		30.937	-115.481	12.8	4	47	34	12	7	0	50.5376	36.5591	12.9032
G33	musc	x	30.9423	-115.471	13.7	5	47	31	15	4	3	50.5376	33.3333	16.129
D34	musc		30.952	-115.456	14.8	6	45	40	7	8	0	48.913	43.4783	7.6087
G34	musc	x	30.9387	-115.467	14.3	10	39	30	22	7	2	42.8571	32.967	24.1758
I36	musc		30.927	-115.465	14.5	16	37	37	15	9	2	41.573	41.573	16.8539
G36	musc	x	30.9344	-115.458	15.4	N.D.††	N.D.††	N.D.††	N.D.††	N.D.††	N.D.††	N.D.††	N.D.††	N.D.††
G36.9	musc	x	30.9325	-115.455	15.8	13	51	34	6	8	1	56.044	37.3626	6.59341
I37	musc		30.924	-115.46	15.5	11	49	35	6	10	0	54.4444	38.8889	6.66667
G40	core	x	30.923	-115.439	17	10	50	30	7	13	0	57.4713	34.4828	8.04598
G42	core		30.918	-115.432	18.2	6	48	34	6	12	0	54.5455	38.6364	6.81818
J42	core	x	30.9062	-115.442	18.1	15	46	40	7	7	0	49.4624	43.0108	7.52688
K44	core		30.899	-115.436	18.3	7	44	36	13	7	0	47.3118	38.7097	13.9785
H46	core	x	30.9039	-115.424	19.7	11	46	33	8	13	0	52.8736	37.931	9.1954
K43.5	core	x	30.9002	-115.438	18.5	9	42	38	7	13	0	48.2759	43.6782	8.04598
Note: mineral modes determined from ~6x8 cm stained slabs; 600 point counts per sample; plagioclase stained red with amaranth, k-spar stained yellow with sodium cobaltinitrite.
* Chem: "x" in this column indicates whole rock chemistry sample
† Margin (km) = distance of sample in kilometers from pluton margin
§ Mag susc = magnetic susceptibility measured with hand-held Geoinstruments JH-8 meter in SI units.
# Mafics = volume% hornblende + biotite + opaques = color index (CI)
** PlagN, QtzN, KsparN = modal percentages normalized to 100%
†† N.D. = not determined.

## Sheet: TABLE DR2 ts mode
GSA Data Repository Item 2014123 accompanies Gastil, R.G., Kimbrough, D.L., Kimbrough, J.M., Grove, M., and Shimizu, M., 2014,
The Sierra San Pedro Mártir zoned pluton, Baja California, Mexico, in Morton, D.M., and Miller, F.K., eds., Peninsular Ranges Batholith,
Baja California and Southern California: Geological Society of America Memoir 211, p. 739–758, https://doi.org/10.1130/2014.1211(24).
TABLE DR2. MODAL MINERAL ABUNDANCES FROM THIN SECTION POINT COUNTING FOR THE SIERRA SAN PEDRO MARTIR PLUTON TRAVERSE
Sample	Zone	Km*	Plag	Qtz	Ksp	Hnb	Biot	Sph	Epi	Opaq	Chl	Apat	Allan	Musc	Other	PlagN	QtzN	KspN
A2.5	hb	0	44	23	8	10	14	0.5	0.5							59	30.6667	10.6667
C3.1	hb	0.2	44	27	6	6	13	1			3					57	35.0649	7.79221
C4	hb	1	50	25	6	7	11	1			0.5	0.5			wm	61.7284	30.8642	7.40741
4.2	hb	1	50	29	2.7	6	12									61.1995	35.4957	3.30477
C4.7	hb	2.5	53	27	1.5	5	12		0.5		0.5		p			65.0307	33.1288	1.84049
B5.9	hb	1.8	52	28	2	6	9	0.5	0.5	0.5	1	0.5			wm	63.4146	34.1463	2.43902
W10.5	hb	3	47	28	4	6.5	9	1.5	1.5	0.5						59.4937	35.443	5.06329
W11.5	hb	3.6	55	25	3	1.5	10	2.5			0.5					66.2651	30.1205	3.61446
A7.2	hb	2.5	53	29	3	1.5	14		1							62.3529	34.1176	3.52941
G12.8	hb	4.1	58	20	1.5	1	11	1.5	0.5	0.5	2	1.5				72.956	25.1572	1.88679
H13	hb	4.3	55	27	2		12.5				1	0.5				65.4762	32.1429	2.38095
B8	hb	2.9	47	32	8	2	9				1	0.5				54.023	36.7816	9.1954
B9	hb	3.3	53	28	2	2.5	11	1.5	1	0.5	0.5	0.5				63.8554	33.7349	2.40964
G14	hb	4.9	53	28	3	1.5	11	p	1	p	p	1				63.0952	33.3333	3.57143
H14.5	dike	5.2	58	23	1.5		16	1	0.5			0.5				70.303	27.8788	1.81818
L14.8	hb	5	48	29	7		12		0.5	1.5		0.5				57.1429	34.5238	8.33333
G15	hb	5.3	52	28	4	1	12	0.5	0.5			0.5				61.9048	33.3333	4.7619
H15.9	hb	6	53	31	2	4	8	0.5	0.5	0.5	1					61.6279	36.0465	2.32558
H16	hb	5.7	49	33	2		13	1	2.5		1					58.3333	39.2857	2.38095
J17	hb	5.7	52	29	5	2	10	1	0.5			0.5	p			60.4651	33.7209	5.81395
G18	hb	6.8	46	35	6	1	10		1.5		0.5		p			52.8736	40.2299	6.89655
E19	hb	7.6	53	23	9		12	0.5	p	p	0.5	p		p		62.3529	27.0588	10.5882
G20	hb	7.7	52	27	8	0.5	10	1	1	p	1.5		0.5			59.7701	31.0345	9.1954
E20.8	hb	8.3	52	25	1	4	14	0.5	2	p	0.5	1				66.6667	32.0513	1.28205
G21	biot	8.1	52	28	3.5	1.4	13	1	0.5			0.5				62.2754	33.5329	4.19162
G23.5	biot	9.6	53	32	6	1	7	0.5	0.5		p	0.5		p		58.2418	35.1648	6.59341
G24	biot	9.6	50	32	6		11	1.5	p		1	0.5				56.8182	36.3636	6.81818
G24.3	biot	9.8	54	27	7		11	0.5		p	1	0.5				61.3636	30.6818	7.95455
E26	biot	10.8	50	30	7		10	1.5		p	p					57.4713	34.4828	8.04598
G26	biot	10.4	49	34	4		10	p	p	p	1	0.5	0.5	p		56.3218	39.0805	4.5977
H26	biot	10.1	35	29	24		12									39.7727	32.9545	27.2727
H28	biot	11.3	48	31	12		7		1.5	p	0.5		p	p		52.7473	34.0659	13.1868
G28	biot	11.5	52	26	9		13									59.7701	29.8851	10.3448
G29	musc	12	46	35	10		6		0.5		p	1		0.5		50.5495	38.4615	10.989
H29.5	musc	12	51	30	11		7		p		0.5			p		55.4348	32.6087	11.9565
G30.4	musc	12.5	49	31	11		6		1	p	0.5	0.5		1		53.8462	34.0659	12.0879
E31	musc	13.3	50	33	7		7		p		1.5			1	mz	55.5556	36.6667	7.77778
G33	musc	13.7	48	29	13		6		1					3		53.3333	32.2222	14.4444
G34	musc	14.3	45	31	15		6		1		p	1	p	2	wm, mz	49.4505	34.0659	16.4835
G36	musc	15.4	37	36	14		8	1			1		0.5	2.5	wm	42.5287	41.3793	16.092
G36.9	musc	15.8	51	33	6		8		0.5	p	0.5			0.5	wm	56.6667	36.6667	6.66667
I37	musc	15.5	49	34	6		10	p	p	p	p			p	wm	55.0562	38.2022	6.74157
G42	core	18.2	49	33	6		8	0.5		0.5	1	p	p	p	wm	55.6818	37.5	6.81818
J42	core	18.1	45	37	8		9	p	p	p	1			p	wm	50	41.1111	8.88889
K43.5	core	18.5	42	38	7		11	p			0.5	0.5		0.5		48.2759	43.6782	8.04598
K44	core	18.3	41	34	13		7	p			1.5	p		2	wm	46.5909	38.6364	14.7727
H46	core	19.7	46	34	8		10	p	p		1.5			p	mz	52.2727	38.6364	9.09091
Note: Mineral abbreviations: Plag=plagioclase; Qtz=quartz; Ksp=alkai feldspar; Hnb=hornblende; Biot=biotite; Sph=sphene; Epi=epidote; Opaq=Fe-Ti oxides; Chl=chlorite;
Apat=apatite; Allan=allanite; Musc=muscovite; wm=white mica; mz=monazite; zircon present in all thin sections; monazite observed in peraluminous musc & core zones of intrusions
* Km = distance of sample in kilometers from pluton margin

## Sheet: TABLE DR3 Monazite 
GSA Data Repository Item 2014123 accompanies Gastil, R.G., Kimbrough, D.L., Kimbrough, J.M., Grove, M., and Shimizu, M., 2014,
The Sierra San Pedro Mártir zoned pluton, Baja California, Mexico, in Morton, D.M., and Miller, F.K., eds., Peninsular Ranges Batholith,
Baja California and Southern California: Geological Society of America Memoir 211, p. 739–758, https://doi.org/10.1130/2014.1211(24).
TABLE DR3. MONAZITE U/Pb DATA DETERMINED BY ISOTOPE DILUTION-THERMAL IONIZATION MASS SPECTROMETRY, SAN DIEGO STATE UNIVERSITY
						Pb isotopic compositions
		weight	Pb	U		Unspiked multiplier corrected					radiogenic ratios					ages (m.y.)
sample	split*	(g)	(ppm)	(ppm)	206/ 208	206/ 207	206/ 204	207*/235	err %	206*/ 238	err %	rho	207*/206	err%	207*/ 235	206*/ 238	207*/ 206	±err
SIERRA SAN PEDRO MARTIR
H46	cg	0.0027	117.66	350.18	0.0417661	14.2117	617.879	0.0963	0.225	0.0150277	0.255	0.97108	0.0464765	0.692	93.355	96.154	22.4	17
	fg	0.0033	115.03	380.57	0.0468532	12.8842	457.637	0.0932106	0.791	0.0149184	0.42	0.93065	0.0453149	0.638	90.49	95.46	-38.695	15
CT	cg	0.002	133.85	773.24	0.0834622	16.1226	925.986	0.0953265	0.466	0.0150047	0.347	0.973	0.046077	0.294	92.453	96.008	1.65	7.1
	fg	0.0023	95.196	611.64	0.0945265	14.2776	620.108	0.0953338	0.575	0.0149562	0.334	0.96312	0.0462299	0.443	92.46	95.7	9.6254	11
LG	cg	0.0031	106.14	551.86	0.076216	11.7949	386.408	0.0955247	0.893	0.0148701	0.377	0.92834	0.0465907	0.766	92.637	95.153	28.298	18
	fg	0.002	92.074	441.8	0.0706382	10.6271	304.756	0.0931106	1.21	0.0148042	0.333	0.95915	0.0456154	1.11	90.397	94.735	-22.667	27
7-25-4	cg	0.0029	137.33	521.43	0.0544138	15.1929	735.963	0.0960662	0.622	0.0152297	0.433	0.949	0.0457465	0.426	93.135	97.437	-15.724	10
	fg	0.0042	162.78	616.04	0.0546884	14.1893	608.489	0.0972712	0.933	0.0152665	0.627	0.8709	0.0462107	0.662	94.254	97.671	8.6281	16
	cg	0.0013	195.27	757.02	0.0560984	14.9535	712.21	0.0968026	0.661	0.0152167	0.46	0.99354	0.0461387	0.45	93.821	97.354	4.8711	11
	fg	0.0023	198.58	792.65	0.0571018	15.04	732.037	0.096833	0.84	0.0151614	0.718	0.95428	0.0463217	0.414	93.849	97.003	14.395	10
Notes: Concentrations determined using a mixed 208Pb/235U spike. Pb isotopic compositions corrected for c. 0.10%±0.05% per mass unit mass fractionation based replicate analysis of NBS981 & NBS983
separation of U and Pb using HCl column chemistry; 204Pb measured using an ion Daly counter; Ages calculated with the following decay constants: 238U=1.55125E-10 and 235U=8.8485E-10
Present-day 238U/235U = 137.88; Common lead corrections made using Stacey and Kramers (1975) model lead isotopic compositions;
Total lead blanks c. 25 picograms.
* split; cg = coarse-grained, fg = fine-grained

## Sheet: TABLE DR4 Cameca U-Pb
GSA Data Repository Item 2014123 accompanies Gastil, R.G., Kimbrough, D.L., Kimbrough, J.M., Grove, M., and Shimizu, M., 2014,
The Sierra San Pedro Mártir zoned pluton, Baja California, Mexico, in Morton, D.M., and Miller, F.K., eds., Peninsular Ranges Batholith,
Baja California and Southern California: Geological Society of America Memoir 211, p. 739–758, https://doi.org/10.1130/2014.1211(24).
TABLE DR4. ZIRCON U/PB DATA DETERMINED BY SECONDARY ION MASS SPECTROMETRY, UNIVERSITY OF CALIFORNIA, LOS ANGELES
Name	U	206Pb/ 204Pb	U/Th	207Pb*/ 235U	207Pb*/ 235U	206Pb/ 238U	206Pb*/ 238U	Corr.	206Pb/ 238U	206Pb/ 238U	207Pb*/ 235U	207Pb*/ 235U	207Pb/ 206Pb	207Pb/ 206Pb
	ppm				1 s.e. (%)		1 s.e. (%)	Coeff.	Age (Ma)	1 s.e.	Age (Ma)	1 s.e.	Age (Ma)	1 s.e.
WCSSPM-1	197.486	1797	1.65827	0.1155	0.0148	0.0149	0.000396	0.2216	95.34	2.52	110.9	13.5	460.3	278
WCSSPM-2	202.971	508.3	1.44332	0.09383	0.0217	0.01575	0.000313	0.4606	100.7	1.98	91.07	20.1	-	-
WCSSPM-3	290.914	3495	1.5428	0.1243	0.0154	0.01515	0.000342	0.3912	96.94	2.17	118.9	13.9	584.5	255
WCSSPM-3	290.914	3495	1.5428	0.1243	0.0154	0.01515	0.000342	0.3912	96.94	2.17	118.9	13.9	584.5	255
WCSSPM-4	351.086	1525	1.56501	0.09871	0.0111	0.01513	0.000285	0.562	96.81	1.81	95.58	10.2	65	245
WCSSPM-6	306.343	1213	1.573	0.09307	0.012	0.01517	0.000256	0.397	97.05	1.63	90.36	11.1	-	-
WCSSPM-7	147	473.6	2.25248	0.1003	0.0162	0.01507	0.000298	0.3669	96.45	1.89	97.03	15	111.4	367
WCSSPM-8	217.371	652.8	1.53925	0.08679	0.0145	0.01483	0.000402	0.3683	94.87	2.55	84.51	13.5	-	-
WCSSPM-9	230.229	963.9	2.6193	0.08792	0.00989	0.01437	0.000298	0.5258	91.95	1.9	85.56	9.23	-	-
WCSSPM-10	174.171	888	2.10681	0.09349	0.0139	0.01468	0.00028	0.4264	93.96	1.78	90.75	12.9	7.271	340
WCSSPM-11	217.886	636.1	1.60498	0.08877	0.0135	0.01577	0.000662	0.381	100.9	4.2	86.36	12.6	-	-
WCSSPM-12	330.857	1890	2.54203	0.09739	0.01	0.01552	0.000352	0.3407	99.26	2.23	94.36	9.27	-	-
Corona-1	457.371	2453	2.31254	0.09541	0.00882	0.01584	0.000468	0.3772	101.3	2.97	92.53	8.18	-	-
Corona-2	602.4	2813	1.97839	0.1269	0.00927	0.01664	0.000665	0.7032	106.4	4.22	121.3	8.36	424.6	119
Corona-3	312	1440	2.99588	0.1018	0.00787	0.01458	0.000402	0.5264	93.32	2.56	98.39	7.26	223	155
Corona-4	234.343	1300	3.12848	0.0917	0.0104	0.01495	0.000428	0.437	95.69	2.72	89.08	9.69	-	-
Corona-5	420.343	2791	2.09508	0.09025	0.0121	0.01416	0.000391	0.5045	90.67	2.48	87.74	11.2	8.567	294
Corona-6	332.743	778	2.54327	0.09072	0.0106	0.01474	0.000404	0.4816	94.33	2.57	88.18	9.88	-	-
Corona-7	394.8	1539	2.33818	0.1085	0.0119	0.01545	0.000513	0.5196	98.81	3.26	104.6	10.9	237.9	223
Corona-8	104.4	1249	2.2984	0.08499	0.0129	0.01443	0.00057	0.4549	92.35	3.62	82.82	12.1	-	-
Corona-9	334.114	996.7	2.68294	0.1047	0.0119	0.01493	0.000434	0.4492	95.5	2.75	101.1	11	235.1	240
Corona-10	268.114	1132	2.51675	0.09054	0.0122	0.01446	0.000391	0.4269	92.55	2.49	88.01	11.4	-	-
Corona-11	382.8	1078	2.4257	0.09384	0.00835	0.01428	0.000395	0.5074	91.43	2.51	91.07	7.75	81.58	187
LaGrulla-1	711.429	2525	5.21052	0.098	0.00527	0.01621	0.000502	0.5586	103.6	3.19	94.92	4.87	-	-
LaGrulla-2	99.1886	418.2	3.36669	0.05898	0.0164	0.01393	0.000565	0.2079	89.19	3.59	58.19	15.7	-	-
LaGrulla-3	119.074	772.8	2.86082	0.08646	0.0118	0.01516	0.000596	0.4367	96.99	3.78	84.2	11.1	-	-
LaGrulla-4	501.943	4369	7.64483	0.09501	0.00501	0.01467	0.000509	0.5005	93.9	3.24	92.16	4.65	47.15	111
LaGrulla-5	439.2	1690	3.09805	0.09187	0.00666	0.01483	0.000504	0.541	94.9	3.2	89.25	6.2	-	-
LaGrulla-6	802.286	4596	28.3639	0.1347	0.00549	0.02145	0.000707	0.8024	136.8	4.46	128.4	4.91	-	-
LaGrulla-7	336.686	1265	2.28865	0.09384	0.0106	0.01499	0.000629	0.3551	95.92	3.99	91.07	9.82	-	-
LaGrulla-8	713.657	2002	3.64056	0.09213	0.00438	0.014	0.000434	0.4748	89.65	2.76	89.49	4.07	85.07	101
LaGrulla-9	2724	5068	11.1554	0.09438	0.00335	0.01461	0.000476	0.899	93.5	3.03	91.58	3.11	41.77	37.2
LaGrulla-10	214.971	975.5	2.53374	0.08365	0.0117	0.01429	0.000578	0.3178	91.49	3.67	81.58	10.9	-	-
LaGrulla-11	248.571	2213	3.84204	0.1383	0.0128	0.02656	0.000908	0.3745	169	5.7	131.5	11.4	-	-
LaGrulla-12	609.257	4589	14.8274	0.3131	0.011	0.03995	0.00126	0.7435	252.5	7.78	276.6	8.49	485.6	53.1
LaGrulla-14	258.343	981.7	4.25197	0.08851	0.00887	0.01329	0.000427	0.6077	85.11	2.72	86.11	8.27	113.8	200
LaGrulla-15	1555.89	4361	8.22746	0.09546	0.00348	0.01472	0.000416	0.7788	94.17	2.64	92.57	3.23	51.53	54.6
LaGrulla-16	156.943	530.1	3.34053	0.07945	0.0158	0.01452	0.000541	0.2371	92.93	3.44	77.63	14.9	-	-
H46 2005-07-10Jul\ Core_SSPM@3.ais									84.71	2.568
H46 2005-07-10Jul\ Core_SSPM@1.ais									85.16	5.111
H46 2005-07-10Jul\ Core_SSPM@4.ais									88.21	1.959
H46 2005-07-10Jul\ Core_SSPM@13.ais									88.32	1.852
H46 2005-07-10Jul\ Core_SSPM@16.ais									88.4	1.6
H46 2005-07-10Jul\ Core_SSPM@6.ais									88.76	3.422
H46 2005-07-10Jul\ Core_SSPM@11.ais									91.36	2.927
H46 2005-07-10Jul\ Core_SSPM@18.ais									92.5	1.5
H46 2005-07-10Jul\ Core_SSPM@2.ais									92.96	3.398
H46 2005-07-10Jul\ Core_SSPM@5.ais									96.94	2.05
H46 2005-07-10Jul\ Core_SSPM@9.ais									109.1	2.459
H46 2005-07-10Jul\ Core_SSPM@10.ais									147.2	5.24
H46 2005-07-10Jul\ Core_SSPM@12.ais									183.8	2.505
H46 2005-07-10Jul\ Core_SSPM@15.ais									194.3	3.4
H46 2005-07-10Jul\ Core_SSPM@8.ais									212.9	3.406
H46 2005-07-10Jul\ Core_SSPM@17.ais									252.7	3.9
H46 2005-07-10Jul\ Core_SSPM@14.ais									268.3	4.282
G.4-24.3 2005-07-10Jul\ G24 SSPM@11.ais									93.28	1.796
G.4-24.3 2005-07-10Jul\ G24 SSPM@7.ais									93.54	2.141
G.4-24.3 2005-07-10Jul\ G24 SSPM@4.ais									93.74	2.166
G.4-24.3 2005-07-10Jul\ G24 SSPM@6.ais									94.02	2.212
G.4-24.3 2005-07-10Jul\ G24 SSPM@9.ais									94.68	1.873
G.4-24.3 2005-07-10Jul\ G24 SSPM@3.ais									94.82	2.23
G.4-24.3 2005-07-10Jul\ G24 SSPM@1.ais									94.93	2.117
G.4-24.3 2005-07-10Jul\ G24 SSPM@13.ais									95.08	2.375
G.4-24.3 2005-07-10Jul\ G24 SSPM@5.ais									96.56	1.72
G.4-24.3 2005-07-10Jul\ G24 SSPM@10.ais									97.51	1.737
G.4-24.3 2005-07-10Jul\ G24 SSPM@8.ais									121.7	1.575
G.4-24.3 2005-07-10Jul\ G24 SSPM@2.ais									538.8	8.344

## Sheet: TABLE DR5 probe summ 
GSA Data Repository Item 2014123 accompanies Gastil, R.G., Kimbrough, D.L., Kimbrough, J.M., Grove, M., and Shimizu, M., 2014,
The Sierra San Pedro Mártir zoned pluton, Baja California, Mexico, in Morton, D.M., and Miller, F.K., eds., Peninsular Ranges Batholith,
Baja California and Southern California: Geological Society of America Memoir 211, p. 739–758, https://doi.org/10.1130/2014.1211(24).
TABLE DR5. SAMPLE DETAILS OF INDIVIDUAL ELECTRON MICROPROBE MINERAL ANALYSES; BY MAASAKI SHIMIZU USING A JEOL 733 INSTRUMENT AT UNIVERSITY OF TOKYO
Sample	Zone	Lat	Long	MS	Plag rim	Plag mid	Plag core	Ksp rim	Ksp mid	Ksp core	Amp rim	Amp mid	Amp core	Bte rim	Bte mid	Bte core	Chl	Mu rim	Mu mid	Mu core	Sph	Mt	Ilm	Epd
Sierra San Pedro Martir Pluton
Vibora	M	30.8876	-115.498	5	5	5	2		1					5		3	4	3		3	1			2
7-24-1	H	30.9597	-115.432	40	2	2	1				6	1	5	1		1	1				4	3	1
7-24-2	H	30.9649	-115.437	400	4	7	1				9		5	2		4	2					2
7-24-3	H	30.9779	-115.444	400	4		1				2		1	2		1	2
7-24-5	H	30.9777	-115.474	250	6	4	2	1	1		2		2	6	2	3	2		2			4
7-25-4	M	30.9219	-115.484	10	4	8	2							4		4	1		2
7-25-7	B	30.9564	-115.501	400	3	6								6		3
7-25-8	B	30.9648	-115.502	300	4	5	5							6		4						2		1
7-26-2	B	30.963	-115.518	400	5	4	4							4	1	2			1			3
7-26-3	B	30.9739	-115.521	30	5	1	5							5		4					3
7-26-4	H	31.9893	-115.515	550	8		5				5		3	4		2					1
7-26-6	H	31.0035	-115.542	800	3	2	3		1		1	3	1	1		2					2
7-26-7	H	30.9905	-115.575	200	6	2	3							4		4								5
7-26-8	H	30.9651	-115.596	900	5	2	4				4	1	2	2		2						4		4
VO_6	H	31.011	-115.474	20	10		1				6		4	4		4					2
VO-7		31.0161	-115.47	18							6		4	5	2	3
La Posta Pluton - eastern side
LP-19	H	32.712	-116.054	5	3	4	2				3		2	8	1	4					2
LP-13	LB	32.7	-116.08	5	3	2	1							2	2	2					3
LP-32	SB	32.683	-116.067	5	5	5	3							2							3		2
LP-18A	M	32.659	-116.096	5	3	5	3							7		5
Laguna Juarez Pluton
LJ-H	H	32.0829	-115.975	20	2	2					7	1	4	2		1					2		3
7-31-2	H	32.0983	-115.966	24	3	5	3				2	5	2	5		4					4		1
7-31-3	H	32.0954	-115.962	23	4	7	4				4		2	5		3					2			3
7-31-4	B	32.0946	-115.959	10	5	3	3	2	1	1				4	4	2	1
7-31-5	B	32.0931	-115.954	6	5	4	2							1	1	1	1				3			4
LJ-B	B	32.0855	-115.934	8	4	7	2							4		3	1				1			3
LJ-M1	M	32.0776	-115.926	7	2	2								2		2			2					2
LJ-M2	M	32.0416	-115.918	5	2	2	1	1	2					3	2	3		2	1	2				2
Other La Posta-type plutons
7-28-3		28.376	-113.102	250	3	6	1							6		3					4	2
7-28-4		28.27	-113.139	1900							2	1	2	1		1	1				2	4
7-28-5		28.177	-113.215	1500	1	1	1		1		2	1	1	4		2					4	3
7-29-2		29.442	-114.355	15	2	7	2				3	2	2	4	1	3
7-29-3		29.571	-114.365	15	5	6	2				6		3	6		3		3		2
7-29-5		29.581	-114.377	15	2	4	2				6		3	6		3					3
7-29-6		29.601	-114.392	15	5	8	3	1	1	1				3		2					2
7-29-7		30.881	-114.753	15	1	4	1	1	4	1	2		3	3		1					2
El Topo Pluton
ET-H	H	32.2634	-115.967	80	1	2								5		6	2						1
7-30-3	H	32.266	-115.955	19		8					3	1	3	4		3	3
7-30-6		32.2958	-115.942	24										1		1		7	1	4
ET-B	B	32.2159	-115.976	14	4	2	1							5	1	3
Snoopy	B	32.2275	-115.944	4	4	2	1	1	2					3	5	1
7-30-7	M	32.2943	-115.943	5	4	2	3	1	5					4	4	4
El Pinal Pluton
EP		32.2066	-116.279	400	2	3	2	1		1	2		2	6		3						3	1
San Jose Pluton
SJ		30.9665	-115.701	2400	3	2	2				3	2	6	2		2	1				1	4	2
Valle Pedregosa Pluton
VP-4	H	31.6918	-116.198	20	1	3	1				1		1	4	3	3
VP-8	H	31.6908	-116.198	3000	4	7	4				3		3	1	1	1	4		1			4
VP-9	H	31.6902	-116.198	3000	4		2				2		2	2		2	1					3	4
Los Encinos Pluton
LE-1	H	31.6615	-116.204	2000	4	3	3				7	1	5	2	1	2							5
LE-2	H	31.6616	-116.204	55	3	4	2				5		2	4		1
LE-3	hybrid	31.6616	-116.204	20	5	3	4							8		4	4			3
Western Peninsular Ranges
Woodson	H	33.0071	-116.968	1500	1	4	1							3		2					5	4
Victoria	H	32.8396	-116.768	600		9					3	4	2								2		1
AlpineHts	Gab	32.8261	-116.791	2000	2	7	2								10							3	2
Sierra Nevada - Tuolomne transect
8-4-5				4000	8	4	6				8		4	7	3	7	1				6	3
8-4-6	Kkc	37.806	-119.556	2400	5	5	2				4	1	3	7		4					2	2
8-4-7	Khde	37.817	-119.511	2400	2	4	2				1		1	2		1					2	6
8-4-8	Khde	37.811	-119.485	2400	5	3	1				3	1	2	2		1	3					6		1
8-4-9	Khdp	37.838	-119.452	5000	2	2	1				5		4	2	1	2					4	4
8-4-11	Kcp	37.878	-119.395	5000	3	5	2							1	1	1		2		1	8	6	1
Sierra Nevada - Lake Isabella transect
8-5-2	Kcr			1000	4	2	4							7	3	5		2	1	1		2
8-5-5		35.662	-118.301	2400	1	3	1				8	2	7	3		2	3				2	4
8-5-7	Kas	35.614	-118.49	250	4	1	3				1		1	8		4	1					5
8-5-8	Kpf			20	2	3	2				7	3	4	2		1					3
Note: Mineral abbreviations: Plag=plagioclase; Ksp=alkai feldspar; Amp=amphibole; Bte=biotite; Chl=chlorite; Mu=muscovite; Sph=sphene; Mt=magnetite;
ilm=ilmenite; epd=epidote; px=pyroxene; MS = magnetic susceptibility measured with hand-held Geoinstruments JH-8 meter in SI units (x10-5).
Ti oxide analysed from 7-24-1; pyroxene analyzed from Victoria
Tuolomne map units after Bateman (1992); Lake Isabella map units after Ross; latitude & longitude WGS84 datum

## Sheet: TABLE DR6 probe data
GSA Data Repository Item 2014123 accompanies Gastil, R.G., Kimbrough, D.L., Kimbrough, J.M., Grove, M., and Shimizu, M., 2014,
The Sierra San Pedro Mártir zoned pluton, Baja California, Mexico, in Morton, D.M., and Miller, F.K., eds., Peninsular Ranges Batholith,
Baja California and Southern California: Geological Society of America Memoir 211, p. 739–758, https://doi.org/10.1130/2014.1211(24).
TABLE DR6. MICROPROBE MINERAL ANALYSES FOR PENINSULAR RANGES AND SIERRA NEVADA BATHOLITH SAMPLES
Sample	Mineral	Spot	Grain	SiO2	TiO2	Al2O3	FeO	MgO	MnO	CaO	Na2O	K2O	Cr2O3	V2O3	NiO	P2O5	Total	Ab%	An%	Or%
Sierra San Pedro Martir Pluton
VO-6	plag	rim	a	60.95		24.67				6.38	8.41	0.23					100.64	69.58	29.16	1.26
VO-6	plag	mid	a	60.37		25.12				6.52	8.19	0.22					100.42	68.64	30.17	1.18
VO-6	plag	core	a	58.49		26.54				8.25	7.13	0.18					100.59	60.37	38.64	0.99
VO-6	plag	rim	a	59.48		25.31				6.81	8.34	0.3					100.24	67.79	30.59	1.62
VO-6	plag	mid	b	59.66		24.98				6.91	8.12	0.33					100	66.79	31.38	1.83
VO-6	plag	rim	b	60.05		25.02				6.68	8.04	0.27					100.06	67.49	31.02	1.5
VO-6	plag	rim	c	60.07		24.96				6.18	8.45	0.3					99.96	70.05	28.29	1.66
VO-6	plag	mid	c	59.38		25.34				6.73	8.23	0.29					99.97	67.79	30.63	1.58
VO-6	plag	mid	c	59.75		25.02				6.55	8.09	0.35					99.76	67.75	30.3	1.95
VO-6	plag	mid	c	59.89		25.11				6.66	8.15	0.34					100.15	67.61	30.52	1.87
VO-6	plag	rim	c	60.27		24.97				6.53	8.25	0.16					100.18	68.94	30.19	0.88
VO-6	amp	rim	a	47.4	0.8	6.63	16.92	11.47	0.47	12.05	0.9	0.72	0.12	0.05			97.53
VO-6	amp	rim	a	48.42	0.65	5.54	16.75	11.86	0.5	11.82	0.9	0.59	0.05	0.07			97.15
VO-6	amp	core	a	49.15	0.64	5.6	16.34	11.99	0.51	11.88	0.9	0.55	0.05	0.05	0.04		97.7
VO-6	amp	rim	b	47.5	0.88	7.39	16.66	11.22	0.49	11.9	1.05	0.73	0.12	0.1			98.04
VO-6	amp	core	b	49.61	0.42	5.25	16.59	11.93	0.51	12	0.72	0.54	0.05	0.06			97.68
VO-6	amp	rim	c	48.49	0.62	6.62	17.35	11.15	0.51	11.9	1.04	0.62	0.11	0.08			98.49
VO-6	amp	rim	c	48.36	0.74	6.8	17.43	11.58	0.48	12.15	0.94	0.63	0.03	0.05			99.19
VO-6	amp	core	c	48.73	0.81	6.32	17.25	11.67	0.46	11.82	1.01	0.59	0.05	0.08			98.79
VO-6	amp	rim	d	48.85	0.67	6.15	16.56	11.8	0.46	11.97	0.88	0.59	0.04	0.06			98.03
VO-6	amp	core	d	46.81	0.88	7.7	17.33	10.92	0.46	11.81	1.09	0.83	0.05	0.07			97.95
VO-6	bte	rim	a	36.54	3.23	14.67	20.72	10.27	0.36	0.04	0.1	9.12	0.08	0.06	0.03		95.22
VO-6	bte	rim	b	36.03	3.07	15.33	20.41	10.24	0.25	0.04	0.14	9.22	0.03	0.05			94.81
VO-6	bte	rim	c	37.07	3.91	14.84	20.84	10.28	0.27	0.07	0.15	9.26	0.03	0.03			96.75
VO-6	bte	rim	d	36.37	2.2	15.39	20.9	10.9	0.31	0.11	0.23	9.23	0.01	0.04			95.69
VO-6	bte	core	a	36.57	3.34	14.42	21.23	10.34	0.26	0.03	0.12	9.5	0.07	0.04			95.92
VO-6	bte	core	b	36.4	3.52	14.66	20.96	10.23	0.21		0.19	9.17	0.02	0.02			95.38
VO-6	bte	core	c	36.68	3.67	14.11	20.78	10.27	0.31	0.07	0.16	9.34	0.02	0.03			95.44
VO-6	bte	core	d	36.83	3.72	15.07	20.92	10.43	0.28	0.02	0.13	9.35	0.01	0.02			96.78
VO-6	sph	rim	a	31.2	38.73	1.88	0.52	0.01	0.09	28.05		0.02					100.5
VO-6	sph	core	a	30.68	38.61	1.21	0.8		0.13	27.23	0.04	0.01					98.71
7-24-1	plag	rim	a	58.86	0.02	25.68				7.62	7.85	0.09					100.12	64.8	34.7	0.5
7-24-1	plag	mid	b	58.59	0.03	25.9				7.56	7.7	0.07		0.01	0.04		99.9	64.6	35	0.4
7-24-1	plag	core	c	57.37		26.8		0.01		8.75	7.15	0.08					100.16	59.4	40.2	0.5
7-24-1	plag	mid	d	59.57	0.02	25.59				7.1	7.9	0.05					100.23	66.6	33.1	0.3
7-24-1	plag	rim	e	60.22		25.09				6.54	8.41	0.12					100.38	69.5	29.8	0.7
7-24-1	amp	rim	a	48.93	1.06	7.15	13.18	14.16	0.49	11.06	1.18	0.2					97.41
7-24-1	amp	rim	a	48.56	0.8	7.77	13.72	13.68	0.52	11.26	1.27	0.21		0.03	0.03		97.85
7-24-1	amp	core	a	48.98	0.91	7.4	13.01	14.25	0.47	11.3	1.01	0.17		0.02			97.52
7-24-1	amp	rim	b	48.02	0.57	7.89	14.12	13.09	0.44	11.71	1.14	0.24		0.05	0.02		97.29
7-24-1	amp	rim	b	48.49	1.17	7.09	13.42	14.1	0.46	11.34	1.05	0.21		0.03		0.2	97.56
7-24-1	amp	core	b	48.61	1.08	7.19	13.82	13.82	0.56	10.8	1.28	0.16		0.05			97.37
7-24-1	amp	core	b	47.71	1.49	7.53	13.52	13.85	0.55	10.84	1.22	0.19					96.9
7-24-1	amp	rim	c	47.89	0.91	7.47	13.86	13.47	0.44	11.57	1.23	0.25	0.04	0.05			97.18
7-24-1	amp	core	c	48.42	1.09	7.08	13.09	14.38	0.45	11.66	1.05	0.28		0.06			97.56
7-24-1	amp	core	c	47.7	0.82	7.94	13.67	13.74	0.46	11.13	1.24	0.31	0.03	0.05	0.03		97.12
7-24-1	amp	mid	c	48.52	1.38	7.13	13.12	14.13	0.44	11.22	1.01	0.25	0.04	0.02	0.02		97.28
7-24-1	amp	rim	d	45.31	0.64	8.58	13.98	13.84	0.35	11.73	1.43	0.3		0.08			96.24
7-24-1	bte	core	a	37.31	2.02	16.2	16.75	13.53	0.24	0.1	0.1	8.15					94.4
7-24-1	bte	rim	b	38.25	2.26	15.95	15.48	13.13	0.16	0.18	0.19	8.44		0.05	0.05	0.05	94.19
7-24-1	chl	mid		26.89	1.14	19.13	21.93	16.85	0.34	0.84	0.08	0.11	0.02	0.06			87.39
7-24-1	sph	rim	a	31.54	39.17	1.15	0.64	0.01	0.02	27.88	0.06			0.06	0.01		100.54
7-24-1	sph	rim	b	31.06	39.34	1.12	0.59	0.01	0.06	27.15	0.06	0.01				0.04	99.44
7-24-1	sph	rim	c	31.24	39.12	1.09	1.03	0.01	0.03	27.84	0.05						100.41
7-24-1	sph	rim	d	31.23	39.39	0.79	0.59	0.02		27.54	0.04	0.02			0.01		99.63
7-24-1	mt	rim	a		9.8	0.09	79.57	0.06	0.09	0.05		0.02	0.07	0.48	0.03	0.03	90.29
7-24-1	mt	rim	a	0.02	12.11	0.11	77.38	0.01	0.01	0.06	0.06	0.01	0.08	0.46		0.02	90.33
7-24-1	mt	core	a	0.05	9.61	0.08	80.04	0.03	0.07	0.03	0.1		0.11	0.45	0.04	0.2	90.81
7-24-1	ilm	rim	a	0.06	42.6	0.05	55.21	0.16	2.37	0.18	0.03	0.01				0.03	100.7
7-24-1	Ti-oxide	rim	a	0.78	93.64	0.05	4.4	0.01	0.13	0.91	0.05	0.01			0.03		100.01
7-24-2	plag	rim	a	60.17	0.01	24.97	0.04			7.12	7.75	0.26					100.32	65.4	33.2	1.5
7-24-2	plag	mid	a	60.01		24.42				6.96	7.71	0.31					99.41	65.6	32.7	1.8
7-24-2	plag	mid	a	60.58	0.02	24.9				7.16	7.58	0.31					100.55	64.6	33.7	1.7
7-24-2	plag	mid	a	60.02		24.64				7.31	7.52	0.37					99.86	63.7	34.2	2.1
7-24-2	plag	mid	a	60.65	0.01	24.53				7.14	7.61	0.32					100.26	64.6	33.5	1.8
7-24-2	plag	mid	a	60.05		24.86				7.31	7.69	0.34					100.25	64.3	33.8	1.9
7-24-2	plag	rim	b	60.49		24.8				6.71	8.09	0.22					100.31	67.7	31.1	1.2
7-24-2	plag	rim	b	59.98		25.03				6.77	8.02	0.19					99.99	67.5	31.5	1.1
7-24-2	plag	mid	b	59.59		25.32				7.03	7.75	0.34					100.03	65.3	32.8	1.9
7-24-2	plag	mid	b	59.18	0.02	25.72				7.49	7.66	0.1					100.17	64.5	34.9	0.6
7-24-2	plag	core	b	58.16		26.21				8.25	7.17	0.25					100.04	60.3	38.3	1.4
7-24-2	plag	rim	c	59.71		25.03				6.98	7.94	0.2					99.86	66.6	32.4	1.1
7-24-2	amp	rim	a	45.1	0.9	9.9	17.88	10.29	0.37	11.91	1.05	1.01		0.06	0.02		98.49
7-24-2	amp	rim	a	44	1.37	10.23	18.05	9.85	0.41	11.93	1.98	1.2		0.04	0.03		99.09
7-24-2	amp	core	a	45.67	1.21	8.87	17.32	10.76	0.4	11.71	1.15	0.9	0.02	0.02			98.03
7-24-2	amp	rim	b	44.76	1.15	9.59	17.95	9.99	0.4	11.77	1.14	0.98		0.03			97.76
7-24-2	amp	rim	b	43.96	1.33	10.27	18.3	9.54	0.43	11.8	1.24	1.27					98.14
7-24-2	amp	core	b	44.76	1.17	9.67	17.89	9.99	0.47	11.87	1.24	1.04		0.04			98.14
7-24-2	amp	rim	c	45.18	0.88	9.87	17.62	10.08	0.38	11.9	1.12	1.02	0.03	0.07			98.15
7-24-2	amp	rim	c	45.85	1.01	9.41	17.47	10.12	0.39	11.94	1.13	1.03		0.05	0.02		98.42
7-24-2	amp	core	c	42.89	0.12	11.26	21.69	7.48	0.34	11.73	1.07	1.07		0.13			97.78
7-24-2	amp	core	c	45.36	1.05	9.72	18.04	9.98	0.37	11.87	1.12	1.05		0.05			98.61
7-24-2	amp	rim	d	44.52	0.73	9.77	18.01	9.78	0.44	11.89	1.11	1.04		0.06	0.05		97.4
7-24-2	amp	rim	d	44.85	0.78	9.87	18.12	9.86	0.42	11.73	1.23	1.05		0.04			97.95
7-24-2	amp	rim	d	44.8	0.78	9.91	17.72	9.96	0.39	11.97	1.23	1.06		0.05			97.87
7-24-2	amp	core	d	44.88	0.72	9.76	17.88	9.93	0.45	11.83	1.15	1.08	0.05	0.04			97.77
7-24-2	bte	rim	b	37.02	2.93	15.18	19.19	10.38	0.33	0.07	0.09	9.55		0.03			94.77
7-24-2	bte	rim	c	37.3	3.41	14.86	19.23	10.84	0.24	0.01	0.08	9.68	0.07	0.02			95.74
7-24-2	bte	core	a	37.23	3.25	14.88	19.35	11.16	0.26		0.09	9.39	0.07	0.06			95.74
7-24-2	bte	core	b	37.3	2.89	15.22	19.78	10.63	0.21	0.02	0.08	9.75		0.04			95.92
7-24-2	bte	core	c	37.74	3.37	15.17	19.27	11.11	0.33		0.1	9.76	0.02	0.03			96.9
7-24-2	bte	core	c	37.45	3.23	14.86	18.78	10.91	0.25		0.08	9.11	0.04	0.03			94.74
7-24-2	chl		a	26.05	0.04	20.51	23.11	15.95	0.48	0.02		0.08		0.05			86.29
7-24-2	chl		b	25.9	0.04	20.5	23.3	16.27	0.51	0.04		0.04	0.03	0.04			86.67
7-24-2	mt		a	0.01	12.28	0.1	78.81	0.02	0.58	0.08	0.03	0.02	0.04				91.97
7-24-2	mt		b	0	9.1	0.04	80.68	0.02	0.61	0.1		0.04	0.02	0.04	0.06	0.01	90.72
7-24-3	plag	rim	a	64.52	0.01	21.9				4.07	9.74	0.14					100.38	80.6	18.6	0.7
7-24-3	plag	rim	a	65.26	0.02	21.33				3.3	9.87	0.08					99.86	84	15.5	0.5
7-24-3	plag	rim	a	64.4	0.02	22				4.01	9.47	0.15					100.05	80.4	18.8	0.8
7-24-3	plag	rim	b	61.83	0.02	23.46				5.84	8.61	0.08					99.84	72.4	27.1	0.4
7-24-3	plag	core	b	60.6	0.02	24.46				7.01	7.99	0.18					100.26	66.7	32.3	1
7-24-3	amp	rim	a	45.55	0.8	7.95	16.97	11.57	0.39	12.04	1.06	0.73		0.05			97.11
7-24-3	amp	rim	b	42.2	1.1	10.11	18.39	9.91	0.52	11.58	1.37	0.95		0.04	0.02		96.19
7-24-3	amp	core	a	42.13	1.11	9.81	18.24	10.02	0.41	11.66	1.28	1.02		0.07	0.02		95.77
7-24-3	bte	rim	a	37.36	2.38	15.76	18.17	11.74	0.34	0.03	0.09	9.56		0.04	0.03		95.5
7-24-3	bte	core	a	37.28	2.19	15.57	18.11	11.93	0.31	0.01	0.15	9.3					94.85
7-24-3	bte	rim	a	37.13	2.45	14.93	18.62	11.4	0.35		0.16	9.18			0.06		94.28
7-24-3	chl		a	25.74	0.07	18.83	22.25	17.58	0.51	0.03	0.03	0.09		0.06			85.19
7-24-3	chl		b	25.68	0.14	18.45	23.04	17.18	0.49	0.06	0.01	0.09		0.06	0.02		85.22
7-26-8	plag	rim	a	61.25		23.9				5.74	8.92	0.24					100.05	72.8	25.9	1.3
7-26-8	plag	rim	a	60.14		24.13				6.21	8.41	0.24					99.13	70.1	28.6	1.3
7-26-8	plag	core	a	58.74	0.01	25.47				7.62	7.56	0.2					99.6	63.5	35.4	1.1
7-26-8	plag	rim	b	61.29	0.02	23.88				5.3	8.93	0.33					99.75	73.9	24.3	1.8
7-26-8	plag	mid	b	59.51	0.02	25.06				6.93	7.99	0.22					99.73	66.8	32	1.2
7-26-8	plag	core	b	58.77	0.01	25.58				7.61	7.65	0.3					99.92	63.5	34.9	1.7
7-26-8	plag	rim	c	61.95	0.01	23.2				4.39	9.44	0.11					99.1	79.1	20.3	0.6
7-26-8	plag	mid	c	60.65	0.01	24.38				5.91	8.32	0.19					99.46	71	27.9	1.1
7-26-8	plag	core	c	59.5	0.02	25.01				6.4	8.28	0.19					99.4	69.3	29.6	1.1
7-26-8	plag	rim	d	63.36	0.02	22.42				3.31	10.15	0.14					99.4	84.1	15.2	0.8
7-26-8	plag	core	e	58.49		26.3				7.24	7.81	0.21					100.05	65.4	33.5	1.2
7-26-8	amp	mid	a	54.32	0.05	2.05	11.1	16.24	0.42	12.72	0.31	0.09		0.02			97.32
7-26-8	amp	rim	b	43.9	1.18	9.45	18.2	9.97	0.4	11.69	1.34	0.97		0.04			97.14
7-26-8	amp	rim	b	44.89	0.91	8.3	17.58	11.02	0.43	11.76	1.21	0.79	0.03	0.06			96.98
7-26-8	amp	core	b	46.75	1.04	6.87	16.3	12	0.42	11.7	1.18	0.5		0.04			96.8
7-26-8	amp	rim	c	45.44	1.3	8.58	17.97	10.78	0.49	11.64	1.41	0.7		0.04			98.35
7-26-8	amp	rim	c	45.88	1.09	8.72	17.6	10.76	0.52	11.78	1.46	0.71		0.03			98.55
7-26-8	amp	core	c	45.52	1.31	8.37	17.75	10.79	0.46	11.5	1.32	0.69		0.03			97.74
7-26-8	bte	rim	a	36.39	3	14.96	19.36	10.74	0.29	0.03	0.13	9.2		0.02			94.12
7-26-8	bte	core	a	36.81	3.17	14.77	18.85	10.93	0.33		0.11	9.46			0.03		94.46
7-26-8	bte	rim	b	36.87	2.68	15.03	19.35	10.86	0.35		0.08	9.53					94.75
7-26-8	bte	core	b	36.37	3.35	14.71	19.68	10.19	0.33	0.02	0.07	9.56		0.03			94.31
7-26-8	mt	rim	b		0.03	0.04	91.2	0.01	0.03	0.29		0.01	0.03	0.14	0.04		91.82
7-26-8	mt	mid	a		0.02	0.05	90.13		0.15	0.6		0.02	0.09	0.12	0.03	0.17	91.38
7-26-8	mt	mid	a	0.04		0.06	91.87		0.14	0.02	0.02	0.04	0.03	0.1	0.09		92.41
7-26-8	mt	core	b		0.04	0.07	91.08	0.02	0.1	0.03			0.05	0.13	0.03		91.55
7-26-8	epd	rim	b	37.97	0.15	22.25	13.35	0.02	0.13	23.02				0.06	0.04		96.99
7-26-8	epd	mid	a	37.92	0.11	23.33	11.96	0.03	0.26	23.27	0.04	0.02		0.04			96.98
7-26-8	epd	mid	a	38.53	0.43	22.89	12	0.05	0.31	23.06	0.01			0.09			97.37
7-26-8	epd	mid	b	37.87	0.04	22.52	13.06	0.01	0.19	23.28	0.03			0.08	0.03		97.11
7-26-4	plag	rim	a	60.33	0.01	24.82				6.4	8.25	0.25					100.06	69	29.6	1.4
7-26-4	plag	core	a	59.94		24.62				6.48	8.25	0.37					99.66	68.3	29.7	2
7-26-4	plag	rim	a	60.34	0.04	24.16			0.01	6.06	8.49	0.17					99.27	71.1	28	0.9
7-26-4	plag	rim	b	60.86		24.97				6.06	8.54	0.23					100.66	70.9	27.8	1.3
7-26-4	plag	core	b	59.24	0.02	25.82				7.65	7.71	0.18					100.62	63.9	35.1	1
7-26-4	plag	rim	b	61		24.13				5.92	8.46	0.23					99.74	71.2	27.5	1.3
7-26-4	plag	rim	c	60.98	0.02	24.06				6.35	8.41	0.12					99.94	70.1	29.3	0.7
7-26-4	plag	core	c	60.75	0.03	24.17				6.46	8.32	0.2					99.93	69.2	29.7	1.1
7-26-4	plag	rim	c	61.03		24.04				5.91	8.43	0.24					99.65	71.1	27.5	1.4
7-26-4	plag	core	d	59.38	0.02	25.4				8.09	7.28	0.21					100.38	61.3	37.6	1.1
7-26-4	plag	rim	d	59.16	0.02	25.5				7.62	7.72	0.28					100.3	63.7	34.8	1.5
7-26-4	plag	core	e	60.57		24.92				6.5	8.18	0.18					100.35	68.8	30.2	1
7-26-4	plag	rim	e	59.86		24.73				6.5	8.07	0.19					99.35	68.5	30.5	1.1
7-26-4	amp	rim	a	44.98	1.29	9.11	17.14	9.94	0.37	11.91	1.25	0.83	0.01	0.05	0.03		96.91
7-26-4	amp	core	a	43.91	1.33	9.82	18.09	9.67	0.46	11.75	1.34	1.08		0.06	0.05		97.56
7-26-4	amp	rim	a	44.34	1.26	9.57	17.8	9.89	0.46	11.88	1.28	0.99		0.05	0.04		97.56
7-26-4	amp	core	b	44.31	1.37	9.88	16.94	10.05	0.41	11.67	1.57	0.95					97.15
7-26-4	amp	rim	b	44.11	1.05	10.3	17.81	9.94	0.34	11.82	1.39	1.14		0.04	0.02		97.96
7-26-4	amp	rim	c	43.87	0.77	9.91	17.57	9.48	0.43	12.05	1.42	0.97		0.06			96.53
7-26-4	amp	core	c	43.97	0.85	10.17	17.35	9.41	0.443	11.91	1.49	1.06		0.04			96.693
7-26-4	amp	rim	c	43.82	1.11	10.02	17	9.81	0.36	11.85	1.42	1.06		0.02			96.47
7-26-4	bte	rim	a	36.93	3.32	14.99	19.14	10.14	0.25	0.05	0.15	9.36		0.04	0.04		94.41
7-26-4	bte	core	a	36.89	3.54	14.91	19.15	10.34	0.22	0.01	0.12	9.52	0.02				94.72
7-26-4	bte	rim	a	37.15	3.56	14.97	19.03	10.12	0.21		0.12	9.21		0.03			94.4
7-26-4	bte	rim	b	36.41	3.11	15.02	19.24	10.39	0.31	0.06	0.12	9.37	0.04		0.07		94.14
7-26-4	bte	core	b	36.13	2.9	15.57	19.52	10.44	0.29	0.06	0.12	9.15	0.02		0.03		94.23
7-26-4	bte	rim	b	37.62	2.93	15.61	19.08	10.33	0.19	0.05	0.16	9.26		0.02			95.25
7-26-4	sph	rim	a	30.73	38.39	0.93	0.84	0.01	0.1	27.08	0.04	0.01				0.02	98.15
7-26-4	sph	core	a	30.66	38.03	1.17	1.14	0.001	0.14	27.14	0.03		0.01		0.05	0.01	98.381
7-26-6	plag	core	a	59.4	0.01	25.5				7.35	7.41	0.22					99.89	63.8	35	1.2
7-26-6	plag	rim	b	60.63	0.02	24.25				5.98	8.42	0.17					99.47	71.2	27.9	0.9
7-26-6	plag	mid	b	61.09	0.03	24.25				5.9	8.5	0.09					99.86	71.9	27.6	0.5
7-26-6	plag	core	b	59.11	0.03	25.11				7.1	7.94	0.18					99.47	66.3	32.8	1
7-26-6	plag	rim	c	61.06	0.02	24.07				6.02	7.84	0.14					99.15	69.6	29.5	0.8
7-26-6	plag	rim	d	62.05		23.92				5.59	8.58	0.28					100.42	72.4	26.1	1.5
7-26-6	plag	mid	d	61.78		23.9				5.71	8.4	0.27					100.06	71.6	26.9	1.5
7-26-6	plag	core	d	60.99	0.03	23.95				5.94	8.41	0.2					99.52	71.1	27.8	1.1
7-26-6	ksp		a	65.16	0.02	18.03				0.01	0.45	15.69					99.36	4.2	0.1	95.7
7-26-6	amp	rim	a	44.1	0.5	9.69	18.01	9.85	0.41	11.85	1.1	0.8	0.03	0.02			96.36
7-26-6	amp	mid	a	44.09	0.72	9.46	18.75	10.06	0.45	11.9	1.18	0.94	0.02	0.02			97.59
7-26-6	amp	core	a	43.57	0.77	9.68	18.93	9.82	0.45	11.86	1.25	0.99		0.05	0.05		97.42
7-26-6	amp	mid	a	42.43	0.66	10	19.14	9.61	0.48	11.8	1.25	0.97		0.04			96.38
7-26-6	amp	mid	b	43.59	0.78	9.26	18.51	9.93	0.53	11.64	1.2	0.95	0.03				96.42
7-26-6	bte	core	a	36.34	3.04	14.95	19.09	10.95	0.33	0.01	0.12	9.32	0.02	0.02	0.05		94.24
7-26-6	bte	core	a	36.2	3.15	14.94	19.25	10.91	0.31	0.01	0.14	9.38				0.36	94.65
7-26-6	bte	rim	a	36.23	3.09	14.65	19.82	11.04	0.33		0.12	9.15					94.43
7-26-6	sph		a	29.54	37.82	1.35	1.29	0.03	0.09	27.31	0.07	0.03			0.04		97.57
7-26-6	sph		b	29.95	37.76	1.39	1.42	0.03	0.09	27.03	0.04	0.02			0.02		97.75
7-25-7	plag	mid	a	62.24		23.32				4.58	9.33	0.16					99.63	78	21.2	0.9
7-25-7	plag	mid	a	62.48	0.02	22.95				4.68	9.22	0.1					99.45	77.6	21.8	0.6
7-25-7	plag	rim	b	61.61		23.83				5.22	8.98	0.13					99.77	75.2	24.1	0.7
7-25-7	plag	mid	b	61.49		24.25		0.01	0.01	5.69	8.74	0.11					100.3	73.1	26.3	0.6
7-25-7	plag	mid	b	61.78	0.02	24	0.02			5.28	8.82	0.33					100.25	73.8	24.4	1.8
7-25-7	plag	rim	c	62.02		23.98				5.42	8.72	0.31					100.45	73.2	25.1	1.7
7-25-7	plag	mid	c	61.31	0.02	23.7				5.53	8.93	0.18					99.67	73.8	25.3	1
7-25-7	plag	mid	c	61.58		23.77				5.29	9.08	0.23					99.95	74.7	24.1	1.3
7-25-7	plag	rim	c	61.19		24				5.31	8.89	0.16					99.55	74.5	24.6	0.9
7-25-7	bte	rim	a	36.39	3.46	15.47	21.24	8.88	0.35	0.02	0.12	9.54					95.47
7-25-7	bte	core	a	36.81	3.7	15.6	21.35	8.94	0.25	0.02	0.11	9.51		0.02	0.03		96.34
7-25-7	bte	rim	a	37.12	3.74	15.8	20.81	9.23	0.35		0.11	9.81			0.03	0.05	97.05
7-25-7	bte	rim	b	36.01	3.6	15.72	20.5	8.83	0.31	0.05	0.11	9.39				0.14	94.66
7-25-7	bte	core	b	35.55	3.64	15.87	20.81	8.86	0.34	0.01	0.09	9.54					94.71
7-25-7	bte	rim	b	35.72	3.72	15.58	21.05	8.85	0.29	0.03	0.11	9.71					95.06
7-25-7	bte	rim	c	36.35	2.88	16.01	20.73	9.27	0.31	0.05	0.1	9.41					95.11
7-25-7	bte	core	c	35.25	3.38	16	20.69	9.03	0.28	0.01	0.09	9.58	0.02				94.33
7-25-7	bte	rim	c	36.91	3.15	16.18	20.61	8.91	0.27	0.04	0.12	9.66					95.85
7-25-8	plag	rim	a	61.94	0.01	23.63				5.04	9.18	0.31					100.11	75.4	22.9	1.7
7-25-8	plag	core	a	61.09	0.02	23.88				4.9	8.96	0.34					99.19	75.3	22.8	1.9
7-25-8	plag	mid	b	62.12	0.01	23.19				4.44	9.26	0.16					99.18	78.3	20.8	0.9
7-25-8	plag	mid	b	62.08	0.01	23.33				4.54	9.2	0.1					99.26	78.1	21.3	0.6
7-25-8	plag	mid	b	63.15	0.01	22.26				4.45	9.42	0.16					99.45	78.6	20.5	0.9
7-25-8	plag	rim	c	61.06	0.01	23.86				5.33	8.99	0.26					99.51	74.2	24.3	1.4
7-25-8	plag	core	c	61.26		23.92				5.41	8.92	0.27					99.78	73.8	24.7	1.5
7-25-8	plag	rim	d	62.13		23.34				5.48	9.05	0.2					100.2	74.2	24.8	1.1
7-25-8	plag	mid	d	60.31		24.36				6.45	7.71	0.21					99.04	67.6	31.2	1.2
7-25-8	plag	mid	d	61.08		24.33				6.43	8.16	0.28					100.28	68.6	30	1.5
7-25-8	plag	rim	e	61.34		24.21				5.38	8.82	0.21					99.96	73.9	24.9	1.2
7-25-8	plag	mid	e	60.01	0.01	24.69				6.01	8.62	0.22					99.56	71.4	27.5	1.2
7-25-8	plag	core	e	60.19	0.01	24.43				6.51	8.29	0.21					99.64	68.9	29.9	1.1
7-25-8	plag	core	e	60.04		24.99				6.57	8.17	0.24					100.01	68.3	30.3	1.3
7-25-8	bte	rim	a	36.7	3.97	14.59	20.42	8.74	0.38	0.01	0.13	9.45					94.39
7-25-8	bte	rim	a	36.08	3.79	15.42	20.35	8.94	0.34	0.01	0.11	9.5			0.07	0.15	94.76
7-25-8	bte	core	a	37.15	4.01	14.98	21.43	9.08	0.35		0.09	9.62					96.71
7-25-8	bte	core	a	36.44	3.82	14.99	21.09	9.03	0.4		0.08	9.72	0.05	0.03			95.65
7-25-8	bte	rim	b	36.54	3.56	15.72	21.4	9.35	0.4		0.1	9.3		0.03	0.03		96.43
7-25-8	bte	rim	b	36.19	3.99	15	20.88	8.93	0.38		0.11	9.26		0.04			94.78
7-25-8	bte	core	b	36.44	3.58	15.46	20.49	9.02	0.36	0.02	0.1	9.47		0.03			94.97
7-25-8	bte	rim	c	36.91	2.73	16.27	19.85	9.68	0.35	0.04	0.09	9.53		0.04	0.06		95.55
7-25-8	bte	core	c	36.2	3.06	15.58	20.41	9.49	0.32		0.13	9.49		0.04			94.72
7-25-8	bte	rim	d	35.03	4.19	14.1	22.09	9.06	0.42	0.04	0.08	9.48			0.03		94.52
7-25-8	mt	rim	a	0.36	0.05	1.18	88.15		0.04		0.05	0.18		0.06	0.07		90.14
7-25-8	mt	core	a	0.01	0.06	0.06	90.88		0.03		0.01	0.02	0.02	0.1	0.06		91.25
7-25-8	epd	core	a	38.45	0.17	22.44	13.02	0.01	0.23	23.1		0.01		0.07	0.02		97.52
7-26-2	plag	rim	a	61.42		23.7				5.36	8.8	0.22					99.5	73.9	24.9	1.2
7-26-2	plag	mid	a	61.23		24.05				5.91	8.77	0.16					100.12	72.2	26.9	0.9
7-26-2	plag	core	a	60.41	0.03	24.26				6.34	7.96	0.21					99.21	68.6	30.2	1.2
7-26-2	plag	rim	b	63.15		22.39				4.1	9.72	0.14					99.5	80.5	18.7	0.7
7-26-2	plag	mid	b	61.89		23.32				5.34	9.03	0.27					99.85	74.3	24.3	1.5
7-26-2	plag	core	b	61.12		23.69				5.52	8.71	0.2					99.24	73.2	25.6	1.1
7-26-2	plag	rim	c	61.6		23.89				5.54	8.64	0.22					99.89	72.9	25.9	1.2
7-26-2	plag	rim	c	61.64		24.26				5.82	8.54	0.27					100.53	71.6	27	1.5
7-26-2	plag	core	c	60.59	0.03	24.29				6.1	8.44	0.18					99.63	70.8	28.3	1
7-26-2	plag	rim	d	61.32	0.02	24.06				5.94	8.45	0.19					99.98	71.2	27.7	1.1
7-26-2	plag	mid	d	59.83	0.03	24.69				6.27	8.43	0.25					99.5	69.9	28.7	1.4
7-26-2	plag	core	d	60	0.02	24.49			0.01	6.26	8.37	0.26					99.41	69.8	28.9	1.4
7-26-2	plag	rim	e	63.91		21.44			0.01	3.33	10.2	0.13					99.02	84.2	15.2	0.7
7-26-2	bte	rim	a	37.26	3.32	15.93	20.66	9.57	0.41		0.08	9.61					96.84
7-26-2	bte	core	a	36.66	3.18	15.54	20.43	9.52	0.44	0.02	0.09	9.66	0.04	0.02			95.6
7-26-2	bte	rim	a	37.02	3.19	15.49	20.46	9.41	0.49		0.11	9.83		0.04			96.04
7-26-2	bte	mid	b	37.57	3.14	15.86	20.09	9.61	0.44		0.09	9.8		0.07	0.04		96.71
7-26-2	bte	rim	c	37.02	2.7	15.71	20.07	9.81	0.44	0.04	0.08	9.59	0.03	0.04			95.53
7-26-2	bte	rim	d	35.76	2.95	15.98	20.38	9.86	0.41	0.01	0.1	9.58					95.03
7-26-2	bte	core	d	35.68	2.9	15.89	20.33	9.85	0.45	0.06	0.12	9.54		0.05	0.03		94.9
7-26-2	mu		a	47.89	0.51	28.91	4.7	1.98	0.04		0.18	10.84		0.06		0.07	95.18
7-26-2	mt	rim	a		0.05	0.07	91.8		0.07	0.03	0.03	0.01	0.03	0.27	0.02	0.04	92.42
7-26-2	mt	core	b		0.07	0.08	90.6	0.01	0.14	0.04	0.01	0.01		0.3	0.05		91.31
7-26-2	mt	rim	c		0.03	0.08	91.76		0.07			0.02	0.04	0.29	0.04		92.33
7-26-3	plag	rim	a	61.77		24.14				5.49	8.75	0.26					100.41	73.2	25.4	1.4
7-26-3	plag	mid	a	60.31		24.61				6.54	8.19	0.29					99.94	68.3	30.2	1.6
7-26-3	plag	core	a	59.97		25.29				7.05	7.7	0.3					100.31	65.3	33	1.7
7-26-3	plag	core	a	59.46		25.45				7.03	7.84	0.16					99.94	66.3	32.8	0.9
7-26-3	plag	rim	b	61.16		24.68				6.07	8.36	0.22					100.49	70.5	28.3	1.2
7-26-3	plag	core	b	60.81		24.64				6.09	8.2	0.21					99.95	70.1	28.8	1.2
7-26-3	plag	core	b	60.67	0.03	25.08				6.52	8.07	0.22					100.59	68.3	30.5	1.2
7-26-3	plag	rim	b	60.5		24.07			0.02	6.08	8.23	0.17					99.07	70.3	28.7	1
7-26-3	plag	rim	c	60.02		24.58		0.01		6.25	8.35	0.19					99.4	70	29	1
7-26-3	plag	core	c	60.51		24.84				6.54	8.26	0.18					100.33	68.9	30.1	1
7-26-3	plag	rim	c	61.02	0.01	24.82				6.39	8.19	0.24					100.67	68.9	29.7	1.4
7-26-3	bte	rim	a	35.96	3.45	15.09	20.2	9.77	0.34	0.05	0.19	9.01		0.06			94.12
7-26-3	bte	core	a	36.06	3.38	15.17	19.99	9.62	0.26	0.02	0.16	9.42		0.02			94.1
7-26-3	bte	rim	b	35.83	3.78	14.79	20.7	9.84	0.32	0.02	0.12	9		0.03			94.43
7-26-3	bte	core	b	36.4	3.76	15.08	20.69	9.98	0.35	0.02	0.16	9.34					95.78
7-26-3	bte	rim	b	36.31	3.77	14.87	20.07	9.73	0.35	0.01	0.15	9.39		0.05			94.7
7-26-3	bte	core	c	35.24	3.68	15.35	20.13	9.45	0.26		0.14	9.5			0.04	0.32	94.11
7-26-3	bte	rim	c	35.65	3.94	15.24	19.92	9.64	0.3	0.07	0.13	9.18		0.05			94.12
7-26-3	bte	core	d	36.34	3.52	15.05	20.63	9.68	0.3	0.01	0.11	9.37		0.04	0.04		95.09
7-26-3	bte	rim	d	35.93	3.51	14.91	20.71	9.57	0.27	0.03	0.14	9.23		0.04			94.34
7-25-4	plag	rim	a	62.84		23.18	0.02		0.01	4.38	9.47	0.22					100.12	78.7	20.1	1.2
7-25-4	plag	core	a	61.53		24.19				5.57	8.81	0.25					100.35	73.1	25.6	1.4
7-25-4	plag	mid	a	62.25	0.02	23.75				5.07	9.11	0.17					100.37	75.8	23.3	0.9
7-25-4	plag	rim	a	62.72		23.83				4.95	9.09	0.14					100.73	76.3	23	0.8
7-25-4	plag	rim	a	62.29	0.03	23.71				5.08	8.96	0.13					100.2	75.6	23.7	0.7
7-25-4	plag	mid	b	64.04	0.02	22.5				2.97	10.31	0.31					100.15	84.8	13.5	1.7
7-25-4	plag	rim	c	63.3		23.7				4.52	9.14	0.22					100.88	77.6	21.2	1.2
7-25-4	plag	mid	c	61.83		24.23				5.4	8.39	0.27					100.12	72.6	25.8	1.6
7-25-4	plag	core		59.85		25.47				7.01	7.66	0.2					100.19	65.7	33.2	1.2
7-25-4	plag	mid	c	59.65	0.03	25.35				6.83	7.8	0.17					99.83	66.7	32.3	1
7-25-4	plag	mid	c	60.83		24.98				6.3	8.14	0.2					100.45	69.2	29.6	1.1
7-25-4	plag	mid	c	61.9		24.25				5.74	8.35	0.27					100.51	71.4	27.1	1.5
7-25-4	plag	mid	c	59.79		25.51				7.16	7.81	0.19					100.46	65.7	33.3	1
7-25-4	plag	mid	d	62.95	0.01	23.12				4.66	9.15	0.23					100.12	77.7	21.7	1.3
7-25-4	bte	core	a	34.53	3.1	16.34	24.05	6.55	0.4	0.01	0.12	9.25					94.35
7-25-4	bte	rim	a	35.07	3	16.54	24.39	6.6	0.35	0.08	0.09	9					95.12
7-25-4	bte	rim	a	34.9	3.3	16.21	23.67	7	0.41	0.03	0.1	9.25					94.87
7-25-4	bte	core	b	34.54	3.24	16.22	24.29	6.87	0.38		0.15	9.4		0.04	0.07		95.2
7-25-4	bte	rim	b	34.5	3.42	16.34	23.76	7.05	0.43		0.12	9.37		0.04	0.03		95.06
7-25-4	bte	core	c	34.66	3.17	16.45	22.77	7.41	0.37	0.01	0.09	9.23		0.06			94.22
7-25-4	bte	rim	c	34.39	3.18	16.48	23.86	6.64	0.41	0.02	0.13	9.33	0.03				94.47
7-25-4	bte	core	d	34.84	3.27	16.49	24.25	6.44	0.45	0.03	0.08	9.43				0.04	95.32
7-25-4	mu			45.98	0.79	29.2	5.61	1.48	0.03	0.05	0.2	9.93					93.27
7-25-4	mu			45.58	0.8	28.98	5.84	1.34	0.02	0.03	0.19	10.46	0.02	0.02	0.02		93.3
7-25-4	chl		a	24.79	0.11	18.8	29.9	11.29	0.79	0.01	0.06	0.02	0.03	0.03			85.83
Vibora	plag	rim	a	62.1		23.45				5.06	8.74	0.15					99.5	75.12	24.02	0.86
Vibora	plag	mid	a	63.02		23.6				5.35	7.66	0.17					99.8	71.4	27.54	1.05
Vibora	plag	core	a	61.07		24.21				5.99	7.97	0.27					99.51	69.56	28.92	1.52
Vibora	plag	rim	a	62.99		23.38				4.81	8.61	0.21					100	75.84	23.32	1.2
Vibora	plag	rim	b	63.48		23.12				4.63	8.31	0.16					99.7	75.81	23.24	0.94
Vibora	plag	core	b	61.55		24.16				5.92	7.59	0.28					99.5	38.7	29.61	1.69
Vibora	plag	rim	c	63.48		23.04				4.7	8.57	0.3					100.09	75.42	22.84	1.74
Vibora	plag	mid	c	62.42		23.49				5.14	8.28	0.31					99.64	73.11	25.09	1.8
Vibora	plag	mid	c	62.58		23.57				5	8.39	0.23					99.77	74.23	24.46	1.31
Vibora	plag	mid	c	62.63		23.85				5.11	8.09	0.22					99.9	73.14	25.54	1.32
Vibora	plag	mid	c	63.08		23.61				5.16	8.34	0.18					100.37	73.73	25.21	1.06
Vibora	plag	rim	c	62.94		22.96				5.37	8.35	0.15					99.77	73.16	25.97	0.87
Vibora	ksp	rim	a	65.07		18.98				0.44	0.66	14.54					99.69	6.31	2.34	91.35
Vibora	bte	core	a	34.63	3.27	17.2	27.72	6.93	0.37	0.15	0.05	8.67		0.06			99.05
Vibora	bte	rim	a	34.88	3.46	17.31	22.9	6.83	0.3	0.07	0.09	9.08	0.02	0.04			94.98
Vibora	bte	rim	b	34.36	3.24	17.65	22.89	6.68	0.3	0.04	0.11	9.08		0.06	0.04		94.45
Vibora	bte	core	b	35.08	3.2	17.87	22.62	6.82	0.39	0.06	0.12	9.21			0.02		95.39
Vibora	bte	rim	b	35.02	3.28	17.67	21.78	6.86	0.45	0.07	0.14	9.16		0.07			94.5
Vibora	bte	rim	c	34.74	3.41	17.13	22.85	7.11	0.47	0.05	0.1	9.12		0.03			95.01
Vibora	bte	core	c	35.36	3.76	17.34	22.01	7.04	0.29	0.14	0.13	8.88					94.95
Vibora	bte	rim	c	34.34	4.08	16.61	22.47	6.79	0.34		0.14	9.17	0.04	0.15	0.02		94.15
Vibora	mu	core	a	47.76	2.23	31.92	2.81	0.89			0.32	10.11	0.04	0.01			96.09
Vibora	mu	rim	a	47.82	1.49	31.8	2.77	0.89	0.07	0.01	0.28	9.75	0.01	0.05			94.94
Vibora	mu	rim	b	47.79	1.1	31.4	3.14	1.06		0.01	0.24	9.83	0.01	0.06	0.06		94.7
Vibora	mu	core	b	47.41	1.21	31.48	3.14	0.97	0.05		0.25	9.71		0.03			94.25
Vibora	mu	rim	c	47.47	0.79	31.48	3.65	1.16	0.01	0.01	0.21	9.98	0.02	0.09	0.03		94.9
Vibora	mu	core	c	47.25	1.45	32.12	2.77	0.91	0.05		0.23	10.33		0.03	0.06		95.2
Vibora	chl	core	a	25.87	0.09	19.01	30.77	10.1	0.57	0.02	0.07	0.1	0.01	0.09			86.7
Vibora	chl	core	b	25.04	0.07	20	29.81	10.83	0.67	0.04	0.02	0.04					86.52
Vibora	chl	core	c	24.57		20.47	28.97	11.39	0.62	0.05	0.02	0.05	0.03	0.02			86.19
Vibora	chl	rim	c	24.97	0.03	20.69	28.59	11.79	0.72	0.03	0.05	0.06	0.02	0.05			87
Vibora	sph	core	a	30.76	34.58	4.17	0.64			28	0.01	0.05		0.18			98.39
Vibora	epd		a	38.19	0.29	23.48	11.69	0.02	0.23	22.93	0.03	0.02		0.01	0.08		96.97
Vibora	epd		b	38.56	0.22	23.81	12.29	0.02	0.34	22.8	0.05	0.03		0.03			98.15
7-24-5	plag	rim	a	60.02		24.97				6.16	8.47	0.21					99.83	70.5	28.3	1.2
7-24-5	plag	mid	a	60.58		24.92				6.23	8.51	0.13					100.37	70.7	28.6	0.7
7-24-5	plag	mid	a	60.3	0.01	25.12				6.15	8.3	0.25					100.13	70	28.7	1.4
7-24-5	plag	mid	a	60.33	0.02	25.01				6.24	8.41	0.32					100.33	69.7	28.6	1.8
7-24-5	plag	mid	a	60.04		24.97				6.53	8.35	0.22					100.11	69	29.8	1.2
7-24-5	plag	rim	b	60.52	0.02	24.85				5.57	8.63	0.3					99.89	72.5	25.9	1.7
7-24-5	plag	core	b	60.73		24.32				6.16	8.47	0.24					99.92	70.4	28.3	1.3
7-24-5	plag	rim	b	60.56		24.28				6	8.64	0.17					99.65	71.6	27.5	0.9
7-24-5	plag	rim	c	61.36	0.02	24.26				5.6	8.72	0.18					100.14	73.1	25.9	1
7-24-5	plag	rim	d	61.35		23.99				6.17	8.51	0.26					100.28	70.4	28.2	1.4
7-24-5	plag	core	e	61.6		23.49				5.71	8.5	0.23					99.53	72	26.7	1.3
7-24-5	plag	rim	f	64.26	0.02	22.15				3.64	9.63	0.6					100.3	80.1	16.7	3.3
7-24-5	ksp	rim	a	64.58		18.1				0.01	0.86	15.53					99.08	7.8	0.1	92.1
7-24-5	ksp	mid	b	65.16		18.1				0.04	0.71	15.25					99.26	6.6	0.2	93.2
7-24-5	bte	rim	a	35.37	4.04	15.12	22.11	8.51	0.41	0.01	0.11	9.38					95.06
7-24-5	bte	mid	a	34.94	4.1	14.99	22.01	8.59	0.35	0.02	0.09	9.49			0.06		94.64
7-24-5	bte	core	a	34.5	3.99	15.27	21.81	8.55	0.36	0.01	0.1	9.55					94.14
7-24-5	bte	mid	a	35.39	4.23	15.11	22.18	8.58	0.32	0.01	0.08	9.58			0.04		95.52
7-24-5	bte	rim	a	34.33	3.96	14.81	22.59	8.66	0.31	0.01	0.09	9.47	0.03		0.05		94.31
7-24-5	bte	rim	b	34.81	3.87	15.6	21.73	8.6	0.38	0.01	0.12	9.59	0.04		0.02		94.77
7-24-5	bte	core	b	35.34	3.97	15.16	21.96	8.68	0.28		0.11	9.62			0.05		95.17
7-24-5	bte	rim	b	35.55	3.47	15.45	21.27	8.75	0.38	0.02	0.08	9.67			0.02		94.66
7-24-5	bte	rim	c	34.26	3.81	15.72	21.7	8.62	0.34	0.01	0.08	9.73			0.03		94.3
7-24-5	bte	rim	d	36.65	3.64	15.11	22.57	8.63	0.34		0.09	9.71					96.74
7-24-5	mu		a	47.19	0.39	28.14	5.35	1.61	0.04	0.05	0.18	10.15			0.02	0.03	93.12
7-24-5	mu		a	46.73	0.57	28.36	4.88	1.79	0.07	0.05	0.18	10.73		0.03		0.03	93.42
7-24-5	chl		a	25.82	0.08	19.46	28.09	12.37	0.57	0.03	0.03	0.09		0.05	0.07		86.66
7-24-5	chl		b	29.51	0.49	18.02	24.96	12.75	0.54	0.07	0.02	2.21	0.04	0.05		0.06	88.72
7-24-5	mt	rim	a	0.06	0.08	0.51	91.66	0.03	0.25	0.02			0.01		0.17		92.79
7-24-5	mt	core	a		0.09	0.43	91.07	0.02	0.25				0.01	0.13	0.05		92.05
7-24-5	mt	core	a		0.11	0.37	90.91	0.03	0.2	0.01		0.01		0.15	0.03		91.82
7-24-5	mt	rim	a		0.08	0.33	90.95	0.03	0.13	0.02	0.02	0.03		0.14	0.01		91.74
7-26-7	plag	core	a	61.19	0.03	24.15				5.83	8.5	0.18					99.88	71.8	27.2	1
7-26-7	plag	rim	a	60.66	0.02	24.72				6.29	8.55	0.18					100.42	70.4	28.6	1
7-26-7	plag	rim	b	60.64	0.01	24.28				6.31	8.48	0.23					99.95	70	28.8	1.2
7-26-7	plag	mid	b	59.2	0.01	25.84				8.1	7.41	0.18					100.74	61.7	37.3	1
7-26-7	plag	core	b	58.58	0.03	25.32				9.2	6.77	0.16					100.06	56.6	42.5	0.9
7-26-7	plag	rim	b	61.8		22.79				6.12	8.63	0.18					99.52	71.2	27.9	1
7-26-7	plag	rim	c	61.36	0.02	23.39				5.94	8.74	0.19					99.64	71.9	27	1
7-26-7	plag	rim	d	61.77	0.01	22.68				5.98	8.82	0.26					99.52	71.7	26.9	1.4
7-26-7	plag	mid	d	61.47		22.81				6.1	8.49	0.22					99.09	70.7	28.1	1.2
7-26-7	plag	core	d	61.49		22.81				6.6	8.24	0.25					99.39	68.3	30.3	1.4
7-26-7	plag	rim	e	61.68	0.03	23.19			0.01	6	8.54	0.19					99.64	71.3	27.6	1.1
7-26-7	bte	core	a	37.17	3.41	15.32	20.33	10.1	0.33	0.01	0.07	9.58	0.03	0.04			96.39
7-26-7	bte	rim	a	36.27	3.4	15.06	19.91	9.51	0.31	0.12	0.07	9.44	0.03	0.02			94.14
7-26-7	bte	core	b	37.21	3.19	15.14	20.06	10.2	0.29	0.02	0.06	9.57		0.03		0.07	95.84
7-26-7	bte	rim	b	37.31	3.02	15.38	19.73	10.18	0.35	0.03	0.05	9.68					95.73
7-26-7	bte	core	c	36.88	3.9	14.78	20.03	10.17	0.28	0.01	0.08	9.57	0.03	0.03			95.76
7-26-7	bte	rim	c	37.18	3.96	14.03	19.5	10.1	0.29		0.08	9.81		0.05			95
7-26-7	bte	core	d	37.75	3.35	14.97	19.79	10.52	0.32	0.01	0.07	9.37		0.06			96.21
7-26-7	bte	rim	d	37.44	3.24	15.48	19.35	10.41	0.29	0.06	0.06	9.59					95.92
7-26-7	epd		a	38.62	0.27	22.38	12.94	0.01	0.27	23.43		0.01		0.08			98.01
7-26-7	epd		a	38.57	0.11	22.25	12.85	0.03	0.15	23.55	0.03	0.04		0.06			97.64
7-26-7	epd	rim	b	38.11	0.13	23.29	12.51	0.02	0.19	23.38		0.02		0.06	0.04		97.75
7-26-7	epd	core	b	38.06	0.1	22.72	12.81	0.04	0.29	23.24	0.02	0.02		0.05	0.04		97.38
7-26-7	epd	rim	b	38.38	0.22	23.07	12.86	0.01	0.25	23		0.01		0.04			97.83
VO-7	plag	rim	a	59.27		25.4				7.5	7.02	0.23					99.42	62.07	36.61	1.33
VO-7	plag	core	a	59.67		25.65				7.81	6.83	0.12					100.08	60.83	38.47	0.7
VO-7	plag	core	b	58.58		25.83				7.72	6.94	0.12					99.19	61.51	37.79	0.71
VO-7	plag	mid	b	59.91		25.34				7.23	7.09	0.19					99.76	63.25	35.63	1.12
VO-7	plag	rim	b	60.27		25.35				7.02	6.83	0.17					99.64	63.13	35.86	1.01
VO-7	plag	rim	c	60.28		25.14				6.88	7.32	0.27					99.89	64.76	33.64	4.6
VO-7	plag	core	c	59.3		25.77				7.55	6.94	0.29					99.85	61.41	36.93	1.66
VO-7	plag	mid	c	58.93		25.71				7.61	7.19	0.24					99.68	62.22	36.4	1.37
VO-7	plag	rim	c	59.69		25.51				7.44	7.07	0.23					99.94	62.37	36.29	1.34
VO-7	amp	rim	a	47.8	0.71	7.85	16.26	10.91	0.51	12.09	0.61	0.69	0.02	0.05			97.5
VO-7	amp	core	a	46.69	0.92	8.18	17.68	10.49	0.49	11.79	0.97	0.81	0.02		0.06		98.1
VO-7	amp	rim	a	45.99	0.84	8.28	17.55	10.24	0.53	11.85	0.78	0.81	0.04	0.06	0.01		96.98
VO-7	amp	rim	b	47.58	0.69	7.26	17.25	10.65	0.47	11.84	0.68	0.64		0.18			97.24
VO-7	amp	core	b	44.79	1.11	10.02	17.67	9.29	0.55	11.71	1.11	1.15	0.03	0.1			97.53
VO-7	amp	core	c	44.6	1.22	9.88	17.65	9.5	0.47	11.79	1.06	1.2	0.03	0.06			97.46
VO-7	amp	rim	c	47.2	0.85	7.88	17.22	10.3	0.45	11.88	0.81	0.74		0.01	0.07		97.41
VO-7	amp	rim	d	47.27	0.86	7.72	17.41	10.77	0.46	11.82	0.83	0.79	0.08	0.06			98.07
VO-7	amp	core	d	45.09	1.09	9.44	18.78	9.8	0.46	11.72	1.1	1.06		0.06			98.6
VO-7	amp	rim	d	47.56	0.81	7.63	17.35	10.5	0.54	11.61	0.77	0.8	0.03	0.12	0.01		97.73
VO-7	bte	rim	a	36.29	3.47	15.2	20.68	10.15	0.24		0.16	9.02		0.11	0.02		95.34
VO-7	bte	mid	a	36.58	3.41	15.41	20.63	9.88	0.31	0.03	0.09	9.14	0.06	0.14	0.01		95.69
VO-7	bte	mid	a	36.65	3.49	15.27	20.38	10.13	0.34	0.07	0.11	8.91		0.1			95.45
VO-7	bte	core	a	36.35	3.26	15.4	19.79	9.74	0.21	0.03	0.1	9.05		0.13	0.08		94.14
VO-7	bte	rim	b	36.37	3.18	15.56	20.87	9.93	0.36	0.02	0.09	8.63	0.07	0.07	0.02		95.17
VO-7	bte	core	b	36.5	3.21	15.1	20.32	9.96	0.36	0.03	0.06	8.82	0.01	0.07	0.13		94.57
VO-7	bte	rim	b	36.48	2.87	15.87	20.58	10.1	0.24	0.05	0.09	9.38	0.01				95.67
VO-7	bte	rim	c	36.67	3.74	15.33	20.95	9.47	0.3		0.13	8.93	0.02		0.03		95.57
VO-7	bte	core	c	35.85	3.74	15.2	20.1	9.44	0.34		0.11	9.09	0.04	0.08	0.08		94.07
VO-7	bte	rim	c	36.38	3.79	15.4	21.23	9.52	0.2	0.01	0.05	9.31		0.13	0.01		96.03
La Posta Pluton - eastern side
LP-19	plag	rim	a	60.14		24.4				7.15	7.91	0.23					99.83	65.9	32.9	1.3
LP-19	plag	core	a	59.61		24.77				7.65	7.54	0.28					99.85	63.1	35.4	1.6
LP-19	plag	mid	a	59.87		24.65				7.37	7.47	0.34					99.7	63.5	34.6	1.9
LP-19	plag	mid	a	59.69		24.58				7.46	7.61	0.31					99.65	63.8	34.5	1.7
LP-19	plag	rim	a	59.67		24.53				7.29	7.77	0.19					99.45	65.2	33.8	1.1
LP-19	plag	rim	b	60.63		24.23				6.85	7.9	0.15					99.76	67	32.2	0.8
LP-19	plag	mid	b	60.36		24.02		0.01		6.81	8.03	0.23					99.46	67.3	31.5	1.2
LP-19	plag	mid	b	60.21		24.41				7.27	7.73	0.24					99.86	65	33.7	1.3
LP-19	plag	core	b	60		24.49				7.43	7.69	0.29					99.9	64.2	34.3	1.6
LP-19	amp	rim	a	44.51	1.06	8.86	18.68	9.01	0.39	11.88	1.26	0.94			0.05		96.64
LP-19	amp	core	a	43.55	0.78	9.91	19.64	8.25	0.43	12.03	1.14	1.05		0.03	0.03		96.84
LP-19	amp	rim	b	44.83	0.86	9.21	18.81	8.69	0.39	11.94	1.2	1	0.01	0.03	0.02		96.99
LP-19	amp	core	b	45.46	1.09	9.12	19.23	8.67	0.37	12.03	1.28	1.03	0.02		0.06		98.36
LP-19	amp	rim	b	45.17	1.08	8.76	18.66	8.85	0.4	11.84	1.23	1.05		0.07	0.07		97.18
LP-19	bte	rim	a	37.59	3.28	14.73	20.82	9.65	0.26	0.05	0.1	9.33		0.04	0.02		95.87
LP-19	bte	core	a	37.05	3.16	14.56	20.81	9.72	0.28	0.02	0.12	9.24		0.08	0.05		95.09
LP-19	bte	rim	a	37.06	3.25	14.4	21.01	9.55	0.24	0.07	0.15	9.12		0.04	0.07		94.96
LP-19	bte	rim	b	36.9	3.21	14.09	21.59	9.56	0.31		0.12	9.26		0.08	0.05		95.17
LP-19	bte	core	b	37.21	3.21	13.98	21.69	9.82	0.32		0.1	9.15			0.05		95.53
LP-19	bte	rim	b	37.12	3.25	14.11	21.79	9.49	0.29	0.01	0.14	9			0.04		95.24
LP-19	bte	rim	c	37.05	3.3	14.2	20.69	9.63	0.35	0.01	0.14	9.22		0.02	.	0.04	94.65
LP-19	bte	core	c	36.73	3.46	14.28	21.66	9.49	0.27		0.1	8.9		0.09			94.98
LP-19	bte	rim	c	36.78	3.38	13.87	21.14	9.34	0.17	0.01	0.16	8.9		0.04	0.04		93.83
LP-19	bte	rim	d	37.52	3.11	14.79	20.2	9.74	0.27	0.06	0.14	8.77		0.05	0.06		94.71
LP-19	bte	core	d	37.53	3.03	14.95	21.32	9.58	0.25		0.1	9.19		0.02	0.05		96.02
LP-19	bte	rim	d	38.19	3.27	15.47	20.53	9.14	0.26	0.02	0.13	9.03		0.05	0.07		96.16
LP-19	bte	mid	e	35.67	3.89	15.51	20.04	8.95	0.25	0.04	0.14	9.33		0.03	0.08		93.93
LP-19	sph	rim	a	31.33	37.45	0.49	0.53	0.02	0.06	28.32	0.03	0.02		0.2	0.06		98.51
LP-19	sph	core	a	31.45	37.3	0.64	0.65	0.02	0.11	27.92	0.02	0.01		0.18	0.04		98.34
LP-13	plag	rim	a	59.69		24.89				6.19	8.73	0.06					99.56	71.6	28.1	0.3
LP-13	plag	mid	a	59.57		24.76				6.28	8.51	0.35					99.47	69.7	28.4	1.9
LP-13	plag	core	a	58.68		25.39				7.12	8.14	0.26					99.59	66.5	32.1	1.4
LP-13	plag	rim	a	59.67		24.96				5.95	8.92	0.27					99.77	72	26.5	1.4
LP-13	plag	rim	b	60.17		24.5				6.01	8.76	0.31					99.75	71.3	27	1.6
LP-13	ksp	rim	c	64.7		18.72				0.03	0.71	15.12					99.28	6.6	0.1	93.3
LP-13	bte	core	a	35.47	2.12	16.45	23.26	8.34	0.42	0.04	0.07	9.28			0.04	0.67	96.16
LP-13	bte	rim	a	36.44	3.23	15.63	23.17	8.55	0.38	0.02	0.07	9.34		0.01	0.07		96.91
LP-13	bte	rim	b	36.68	3.93	18.12	19.51	8.15	0.18	0.04	0.15	9.59	0.01	0.02	0.05	0.69	97.12
LP-13	bte	core	b	36.04	3.02	16.18	19.87	8.87	0.28	0.03	0.11	9.38		0.02	0.03	0.36	94.19
LP-13	bte	mid	c	37.19	2.34	15.96	21.98	8.17	0.34	0.03	0.08	9.27		0.02	0.02	0.61	96.01
LP-13	bte	mid	d	37.52	1.48	15.82	21.78	8.74	0.33	0.05	0.09	8.84		0.02	0.04	0.65	95.36
LP-13	sph		a	31.42	38.5	2.1	0.56	0.02	0.11	27.86	0.03	0.01			0.05		100.66
LP-13	sph	rim	b	31.35	38.73	1.89	0.61	0.02	0.13	27.97	0.05	0.01			0.05		100.81
LP-13	sph	core	b	31.28	38.34	1.92	0.74	0.03	0.14	27.32	0.01			0.02	0.08	0.21	100.09
LP-32	plag	rim	a	62.18		23.03				4.53	9.9	0.1					99.74	79.4	20.1	0.5
LP-32	plag	rim	b	61.17	0.02	23.38				5.4	9.36	0.11					99.44	75.4	24	0.6
LP-32	plag	core	b	62.15	0.02	22.82				4.85	8.23	1.83					99.9	68	22.1	1
LP-32	plag	mid	b	61.08		23.39				5.58	9.33	0.15					99.53	74.6	24.6	0.8
LP-32	plag	mid	b	61.67	0.01	23.23				5.66	9.15	0.22					99.94	73.6	25.2	1.2
LP-32	plag	rim	b	61.05		23.55				5.37	9.2	0.12					99.29	75.1	24.2	0.6
LP-32	plag	core	c	60.08		23.95				5.98	9.09	0.21					99.31	72.6	26.4	1.1
LP-32	plag	mid	c	62.05		23.07				5.13	9.25	0.26					99.76	75.5	23.1	1.4
LP-32	plag	mid	c	61.71		22.83				5.07	9.49	0.34					99.44	75.8	22.4	1.8
LP-32	plag	rim	c	62.58		22.5				4.91	9.72	0.18					99.89	77.4	21.6	1
LP-32	plag	rim	d	61.42		22.88				5.35	9.36	0.21					99.22	75.2	23.7	1.1
LP-32	plag	mid	d	61.46		22.9				5.67	9.39	0.15					99.57	74.4	24.8	0.8
LP-32	plag	core	d	60.95	0.01	23.34				5.98	8.78	0.13					99.19	72.1	27.2	0.7
LP-32	bte	core	a	35.26	2.82	17.08	24.64	6.14	0.27		0.13	9.47			0.08	0.49	96.38
LP-32	bte	rim	a	35.58	3	17.41	24.7	6.07	0.26		0.13	9.4			0.08	0.52	97.15
LP-32	bte	mid	b	35.68	2.08	17.11	23.89	6.51	0.26	0.16	0.14	8.46	0.02		0.05	0.4	94.76
LP-32	bte	rim	c	35.21	3.18	17.62	24.5	5.89	0.31	0.06	0.11	9.24			0.1	0.36	96.58
LP-32	bte	core	c	35.11	3.46	16.93	24.35	5.72	0.31		0.08	9.46			0.09	0.41	95.92
LP-32	bte	rim	c	35.52	3.16	17.14	24.95	5.9	0.28		0.1	9.4		0.02	0.08	0.27	96.82
LP-32	bte	mid	d	35.58	2.7	17	25.14	5.81	0.3	0.01	0.09	9.47			0.08	0.13	96.31
LP-18A	plag	rim	a	60.76	0.02	23.8				5.67	8.98	0.2					99.43	73.3	25.6	1.1
LP-18A	plag	mid	a	61.21		23.67				5.55	9.16	0.21					99.8	74.1	24.8	1.1
LP-18A	plag	core	a	60.75		23.85				5.57	9.19	0.19					99.55	74.2	24.8	1
LP-18A	plag	rim	b	61.46		23.82				5.37	9.1	0.14					99.89	74.9	24.4	0.7
LP-18A	plag	mid	b	60.51		24.3				5.4	8.66	0.18					99.05	73.6	25.4	1
LP-18A	plag	core	b	58.84		25.32				7.39	7.89	0.19					99.63	65.2	33.8	1.1
LP-18A	plag	rim	c	61.43		23.38				4.9	9.49	0.24					99.44	76.8	21.9	1.3
LP-18A	plag	mid	c	59.02		26.37				4.98	8.54	0.28					99.19	74.4	24	1.6
LP-18A	plag	mid	c	60.12		23.96				5.77	8.92	0.26					99.03	72.7	26	1.4
LP-18A	plag	mid	c	60.4		24.43				5.82	8.75	0.1					99.5	72.7	26.7	0.6
LP-18A	plag	core	c	58.81		25.02				7.36	8.01	0.18					99.38	65.7	33.3	1
LP-18A	bte	core	a	36.06	3.1	17.9	24	5.97	0.46	0.04	0.13	9.42		0.02	0.02	0.16	97.28
LP-18A	bte	rim	a	35.38	3.03	17.73	24.23	5.79	0.39	0.01	0.13	9.44			0.06	0.24	96.43
LP-18A	bte	core	b	34.98	3.35	17.82	23.44	5.59	0.36	0.02	0.15	9.45			0.07		95.23
LP-18A	bte	rim	b	35.8	3.17	17.57	22.67	5.93	0.37	0.02	0.11	9.43		0.03	0.04	0.13	95.27
LP-18A	bte	core	c	35.81	2.97	17.23	23.76	5.96	0.35	0.02	0.08	9.51				0.34	96.03
LP-18A	bte	rim	c	35.51	2.93	16.97	23.21	5.93	0.42	0.03	0.08	9.28		0.03	0.04		94.43
LP-18A	bte	rim	d	35.3	3.46	17.56	23.83	5.86	0.39	0.01	0.1	9.3				0.49	96.3
LP-18A	bte	core	d	35.51	3.42	17.47	24.08	5.66	0.42		0.08	9.37			0.03	0.46	96.5
LP-18A	bte	rim	d	35.36	3.06	17.33	23.84	5.66	0.41	0.04	0.1	9.27			0.06	0.18	95.31
LP-18A	bte	rim	e	35.69	3.28	17.49	23.49	5.71	0.38	0.01	0.12	9.48				0.1	95.75
LP-18A	bte	core	e	35.72	3.17	17.54	23.06	6.05	0.37	0.01	0.1	9.45		0.04	0.03	0.19	95.73
LP-18A	bte	rim	e	35.26	2.98	17.63	22.76	5.72	0.41	0.01	0.1	9.57		0.03	0.08	0.34	94.89
Laguna Juarez Pluton
LJ-H	plag	rim	a	58.92	0.03	25.82				7.86	6.98	0.19					99.8	60.9	38	1.1
LJ-H	plag		a	58.87		26.41				8.1	6.82	0.21					100.41	59.7	39.1	1.2
LJ-H	plag		a	58.99		26.09				8.13	7.08	0.24					100.53	60.4	38.3	1.3
LJ-H	plag	rim	a	59.26		25.93				7.73	7.14	0.3					100.36	61.5	36.8	1.7
LJ-H	amp	mid	a	46.96	0.89	7.23	16.8	11.24	0.49	11.73	1.02	0.75		0.1			97.21
LJ-H	amp	core	a	45.94	1.11	7.8	17.24	10.54	0.45	11.95	1.15	0.8	0.05	0.03	0.08		97.14
LJ-H	amp	rim	a	46.73	1.17	7.39	17.17	10.96	0.44	11.69	1.06	0.72			0.11		97.44
LJ-H	amp	rim	b	45.54	1.37	8.13	17.56	10.64	0.49	11.75	1.07	0.88	0.04	0.03	0.03		97.53
LJ-H	amp	core	b	45.65	1.35	8.31	17.75	10.56	0.56	11.53	1.2	0.85	0.07	0.1			97.93
LJ-H	amp	rim	c	47.34	0.5	7.39	16.95	11.29	0.47	12.01	0.8	0.59	0.12	0.07	0.02		97.55
LJ-H	amp	rim	d	47.02	0.91	7.38	17.62	11.2	0.43	11.96	0.93	0.7		0.11	0.01		98.27
LJ-H	amp	core	d	46.32	1.17	7.68	17.24	10.75	0.37	12.07	0.82	0.79		0.06			97.27
LJ-H	amp	rim	e	45.82	1.05	8.26	17.31	11.19	0.35	11.72	0.77	0.74		0.09			97.3
LJ-H	amp	core	e	46.69	1.15	7.59	17.15	10.84	0.5	12.07	0.89	0.73	0.06	0.05	0.01		97.73
LJ-H	amp	rim	f	47.68	0.5	6.73	16.58	11.87	0.54	11.86	0.79	0.49	0.04		0.01		97.09
LJ-H	amp	rim	f	49.22	0.4	6.15	16.07	12.2	0.34	11.92	0.7	0.42	0.04	0.07			97.53
LJ-H	bte	rim	a	36.77	3.49	14.83	20.15	10.24	0.33	0.03	0.1	9.41	0.03	0.12	0.01		95.51
LJ-H	bte	rim	b	36.77	3.49	14.97	20.28	10.43	0.21	0.05	0.08	9.66	0.09	0.14	0.03		96.2
LJ-H	bte	core	b	36.22	3.74	14.56	21.16	10.34	0.26	0.03	0.07	9.34	0.02				95.74
LJ-H	sph	rim		30.59	38.43	1.58	0.83		0.08	27.99			0.08	0.21			99.79
LJ-H	sph	rim		30.69	38.44	1.67	0.99		0.05	27.63	0.03	0.02		0.24			99.76
LJ-H	ilm			0.01	50.04	0.03	44.64	0.15	3.23	0.23			0.03	0.11	0.12		98.59
LJ-H	ilm				51.55	0.07	43.53	0.04	4.37	0.1	0.01	0.02	0.06	0.14	0.12		100.01
LJ-H	ilm				52.55		44.59	0.09	3.33	0.11	0.03	0.01		0.29			101
7-31-2	plag	rim	a	57.24		26.59				8.6	7.24	0.17					99.84	59.79	39.27	0.94
7-31-2	plag	mid	a	56.89		26.65				8.72	7.19	0.18					99.63	59.3	39.72	0.98
7-31-2	plag	mid	a	57.18		26.98				9.02	6.92	0.13					100.23	57.7	41.59	0.71
7-31-2	plag	core	a	56.32		27.17				9.46	6.68	0.11					99.74	55.77	43.63	0.59
7-31-2	plag	rim	b	57.23		26.82				8.76	6.92	0.23					99.96	58.12	40.61	1.27
7-31-2	plag	mid	b	57.64		26.52				8.52	7.12	0.25					100.05	59.36	39.25	1.38
7-31-2	plag	mid	b	57.62		26.37				8.56	7.23	0.2					99.98	59.79	39.14	1.07
7-31-2	plag	core	b	56.58		27.2				9.78	6.4	0.22					100.18	53.55	45.24	1.21
7-31-2	plag	core	c	55.59		27.28				10.18	6.31	0.22					99.58	52.3	46.6	1.09
7-31-2	plag	mid	c	57.81		26.48				8.61	7.09	0.2					100.19	59.13	39.68	1.2
7-31-2	plag	rim	c	57.15		26.59				8.79	7.13	0.22					99.88	58.79	40.03	1.18
7-31-2	amp	rim	a	47.54	1.24	7.05	16.43	11.25	0.45	11.81	1.05	0.65	0.01	0.07	0.02		97.57
7-31-2	amp	mid	a	47.35	1.3	7.31	16.76	11.34	0.44	12.13	1	0.62	0.03	0.09			98.37
7-31-2	amp	mid	a	47.79	1.27	7.14	16.69	11.35	0.41	12.23	1.06	0.57	0.04	0.04			98.59
7-31-2	amp	mid	a	47.47	1.12	7.14	16.24	11.45	0.5	12.01	0.97	0.72	0.07	0.05			97.74
7-31-2	amp	core	a	47.51	1.04	7.06	15.79	11.52	0.5	11.91	0.9	0.67	0.02	0.09			97.01
7-31-2	amp	rim	b	48.06	1.03	7.06	16.57	11.7	0.41	12.16	0.97	0.68	0.03	0.04			98.71
7-31-2	amp	mid	b	47.95	1.1	6.95	15.74	11.6	0.44	12.19	0.92	0.71	0.02	0.04	0.04		97.7
7-31-2	amp	mid	b	47.88	1.06	6.91	15.9	11.66	0.51	12.25	0.8	0.6		0.02			97.59
7-31-2	amp	core	b	48.93	0.84	6.51	15.44	11.98	0.35	12.36	0.6	0.6	0.01	0.05	0.01		97.68
7-31-2	bte	rim	a	36.4	3.12	15.1	19.39	10.72	0.23	0.03	0.16	9.06	0.03	0.06		0.04	94.34
7-31-2	bte	core	a	35.82	3.44	15.18	19.87	10.46	0.22		0.15	9.22	0.02		0.04		94.42
7-31-2	bte	rim	a	36.52	3.36	15.29	20.07	10.68	0.25	0.01	0.14	9.22		0.03			95.57
7-31-2	bte	rim	b	36.46	3.38	15.02	19.49	10.44	0.21	0.05	0.15	9.23	0.03	0.05		0.06	94.57
7-31-2	bte	core	b	36.17	3.9	15.09	19.86	10.4	0.25	0.03	0.13	9.29	0.05	0.06	0.04		95.27
7-31-2	bte	core	c	36.48	3.78	14.97	19.22	10.14	0.28	0.03	0.15	9.31	0.15	0.05	0.08	0.03	94.67
7-31-2	bte	rim	c	36.57	3.71	15.03	19.68	10.27	0.27		0.16	9.29	0.03	0.04			95.05
7-31-2	bte	rim	d	34.7	3.34	15.72	20.1	10.59	0.25	0.02	0.18	9.18	0.09	0.06	0.03	0.04	94.3
7-31-2	bte	core	d	35.61	3.64	14.95	19.92	10.31	0.27	0.04	0.14	9.26	0.09	0.05	0.04	0.02	94.34
7-31-2	sph		a	30.9	38.89	1.21	0.31	0.02	0.07	28.41	0.04		0.02	0.08			99.95
7-31-2	sph		b	30.9	37.97	1.79	0.5			28.41	0.07	0.02	0.05	0.09			99.8
7-31-2	sph		c	30.73	38.63	1.38	0.36	0.01	0.08	28.29	0.04			0.03	0.05		99.6
7-31-2	sph		d	31.03	39.35	1.22	0.33	0.02	0.02	28.35	0.06	0.01		0.01	0.01		100.41
7-31-2	ilm				52.77	0.03	44.35	0.08	2.19	0.02	0.08		0.01		0.07	0.02	99.62
7-31-3	plag	rim	a	59.29		25.43				7.28	7.52	0.22					99.74	64.36	34.4	1.24
7-31-3	plag	mid	a	58.92		25.49				7.42	7.7	0.31					99.84	64.16	34.14	1.7
7-31-3	plag	mid	a	57.95		26.11				8.48	6.97	0.31					99.82	58.79	39.51	1.71
7-31-3	plag	core	a	56.89		26.63				9.11	6.7	0.25					99.58	56.33	42.28	1.38
7-31-3	plag	mid	b	57.43		26.18				8.09	7.15	0.35					99.2	60.32	37.74	1.94
7-31-3	plag	core	c	55.93		27.17				9.21	6.92	0.15					99.38	57.13	42.04	0.82
7-31-3	plag	v	c	58.55		25.69				7.61	7.43	0.28					99.56	62.87	35.59	1.53
7-31-3	plag	rim	c	60.3		24.48				5.95	8.65	0.29					99.67	71.32	27.12	1.56
7-31-3	plag	rim	d	60.13		24.78				5.98	8.64	0.32					99.85	71.09	27.2	1.71
7-31-3	plag	mid	d	59.76		25.16				6.67	8.18	0.33					100.1	67.7	30.49	1.82
7-31-3	plag	mid	d	58.85		25.56				7.28	8.06	0.24					99.99	65.83	32.86	1.31
7-31-3	plag	rim	d	59.14		25.63				7.34	7.82	0.31					100.24	64.73	33.57	1.7
7-31-3	plag	core	e	58.35		25.86				7.52	7.84	0.26					99.83	64.46	34.14	1.4
7-31-3	plag	mid	e	58.19		25.95				7.53	7.59	0.27					99.53	63.6	34.89	1.51
7-31-3	plag	rim	e	59.63		25.31				7.21	7.56	0.27					99.98	64.52	33.99	1.49
7-31-3	amp	rim	a	44.88	1.51	8.52	18.91	9.22	0.44	11.87	1.26	1.02	0.04	0.03	0.04		97.74
7-31-3	amp	core	a	45.2	1.58	8.26	18.4	9.63	0.54	11.79	1.43	0.97		0.03			97.83
7-31-3	amp	rim	a	45.02	1.5	8.46	19.03	9.27	0.55	12.03	1.3	0.96	0.02	0.05	0.04		98.23
7-31-3	amp	rim	b	44.46	0.59	9.08	18.88	9.27	0.47	12.16	1.2	0.89	0.06	0.03	0.05		97.14
7-31-3	amp	core	b	46.73	1.14	6.68	18.2	10.57	0.51	12.05	1.1	0.68	0.01		0.05		97.72
7-31-3	amp	rim	b	48.81	0.72	8.92	18.91	9.62	0.42	12.03	1.25	0.87	0.03	0.05			101.63
7-31-3	bte	rim	a	35.23	2.95	14.71	21.76	9.83	0.31	0.08	0.13	9.11	0.01	0.04	0.03	0.03	94.22
7-31-3	bte	core	a	35.71	3.13	14.97	21.13	9.7	0.42	0.02	0.1	9.33	0.02	0.03	0.02	0.04	94.62
7-31-3	bte	rim	a	37.58	3.3	14.83	21.29	9.64	0.32	0.11	0.16	9.23	0.03	0.03	0.04		96.56
7-31-3	bte	rim	b	36.9	3.26	14.75	20.85	9.59	0.28	0.01	0.14	9.35	0.01	0.02	0.05	0.02	95.23
7-31-3	bte	core	b	37.24	3.19	14.75	21.25	9.73	0.32	0.06	0.13	9.16	0.04	0.07	0.05	0.03	96.02
7-31-3	bte	rim	b	37.89	2.46	15.26	20.87	10.2	0.27	0.01	0.13	9.57	0.01	0.03	0.02		96.72
7-31-3	bte	rim	c	36.24	2.38	15.31	21.35	10.2	0.24	0.06	0.1	8.91		0.04	0.05	0.03	94.91
7-31-3	bte	core	d	35.54	2.79	14.87	21.62	9.84	0.34		0.14	9.44	0.08	0.05	0.05	0.03	94.79
7-31-3	sph		a	29.49	37.55	1.6	1.05	0.03	0.01	28.37	0.05	0.01	0.03		0.01		98.2
7-31-3	sph		b	29.15	37.54	1.62	1.09		0.08	28.32	0.04	0.03		0.11	0.02		98
7-31-3	epd		a	37.29	0.33	23.37	11.6	0.07	0.29	23.31	0.04	0.04	0.05	0.09			96.48
7-31-3	epd		b	36.91	0.23	23.45	11.46	0.06	0.29	23.15	0.04	0.01	0.05	0.05	0.02		95.72
7-31-3	epd		c	37	0.06	22.74	12.46	0.03	0.19	23.25	0.03			0.04			95.8
7-31-4	plag	rim	a	60.91		23.98				5.4	9.01	0.15					99.45	74.49	24.67	0.83
7-31-4	plag	mid	a	60.72		24.28				5.91	8.57	0.18					99.66	71.67	27.32	1
7-31-4	plag	core	a	60.51		24.53				5.95	8.41	0.17					99.57	71.21	27.84	0.95
7-31-4	plag	core	b	60.09		24.43				6.02	8.48	0.2					99.22	71	27.89	1.11
7-31-4	plag	rim	b	61.72		23.97				5.31	8.62	0.2					99.82	73.76	25.11	1.13
7-31-4	plag	rim	c	65.47		17.82				0	0.55	15.76					99.6	5.03	0	94.97
7-31-4	plag	rim	d	62.98		22.53				5.02	9.09	0.22					99.84	75.67	23.12	1.21
7-31-4	plag	mid	d	61.63		23.87				5.91	8.66	0.16					100.23	71.97	27.15	0.89
7-31-4	plag	core	d	58.97		25.46				7.3	8.1	0.18					100.01	66.13	32.91	0.97
7-31-4	plag	mid	d	60.01		24.61				6.36	8.61	0.22					99.81	70.17	28.67	1.16
7-31-4	plag	rim	d	61.55		23.65				5.83	8.78	0.19					100	72.41	26.55	1.04
7-31-4	ksp	rim	a	64.58		18.31				0.01	0.98	15.39					99.27	8.81	0.06	91.13
7-31-4	ksp	mid	a	65.02		18.32				0.01	1.05	15.22					99.62	9.46	0.06	90.48
7-31-4	ksp	core	a	64.83		18.5				0.05	1.14	14.9					99.42	10.37	0.24	89.39
7-31-4	ksp	rim	a	65.09		18.19				0.02	0.39	16.07					99.76	3.51	0.13	96.36
7-31-4	bte	rim	a	36.03	3.62	14.87	23.66	8.21	0.43	0.01	0.11	9.48	0.05	0.03	0.02	0.02	96.54
7-31-4	bte	mid	a	36.35	3.61	14.8	23.5	8.23	0.44		0.15	9.47			0.03		96.58
7-31-4	bte	mid	a	35.75	3.87	14.473	23.24	8.08	0.5	0.02	0.13	9.26	0.03		0.02		95.373
7-31-4	bte	core	a	35.95	3.73	14.54	23.42	8.34	0.55	0.05	0.13	9.26	0.05		0.03		96.05
7-31-4	bte	rim	b	35.51	3.89	14.51	23.92	8.02	0.37	0.03	0.11	9.25		0.03			95.64
7-31-4	bte	mid	b	35.69	3.95	14.62	23.88	8.18	0.43		0.14	9.3	0.01	0.05	0.06		96.31
7-31-4	bte	core	b	35.34	3.87	14.67	23.43	8.08	0.4	0.05	0.15	9.27		0.04	0.05		95.35
7-31-4	bte	mid	b	35.21	3.83	14.72	23.76	8.26	0.47		0.14	9.38	0.02	0.03		0.03	95.85
7-31-4	bte	rim	b	35.83	3.54	14.89	23.46	8.09	0.42	0.03	0.12	9.34	0.01	0.06	0.05	0.04	95.88
7-31-4	bte	core	c	36.27	3.4	14.53	23.57	8.19	0.36	0.01	0.07	9.41		0.02		0.03	95.86
7-31-4	bte	rim	c	36.15	3.62	14.52	23.68	7.53	0.44		0.11	9.28		0.02	0.03	0.03	95.41
7-31-4	chl			26.23	0.03	17.41	30.6	11.36	0.61	0.01	0.03	0.15	0.07	0.02		0.03	86.55
LJ-B	plag	rim	a	59.83	0.04	25.03			0.01	7.12	7.64	0.2					99.87	65.2	33.6	1.1
LJ-B	plag	mid	a	59.83		25.35				7.14	7.52	0.21					100.05	64.8	34	1.2
LJ-B	plag	mid	a	60.06		25.08				6.63	7.64	0.25					99.66	66.6	31.9	1.4
LJ-B	plag	rim	a	61.7		24		0.01		5.57	8.28	0.17					99.73	72.2	26.8	1
LJ-B	plag	rim	b	63.35		22.46				4.52	9.1	0.11					99.54	78	21.4	0.06
LJ-B	plag	mid	b	63.05	0.01	23.09	0.02			4.4	9.14	0.15					99.86	78.3	20.8	0.9
LJ-B	plag	mid	b	61.67	0.01	23.73				5.11	8.47	0.19					99.18	74.2	24.7	1.1
LJ-B	plag	core	b	62.01		23.8				5.39	8.45	0.14					99.79	73.3	25.9	0.8
LJ-B	plag	mid	b	62.19		23.83				5.25	8.55	0.24					100.06	73.7	25	1.4
LJ-B	plag	rim	c	62.81		23.23				4.28	9.11	0.14					99.57	78.7	20.4	0.8
LJ-B	plag	core	c	59.66	0.02	24.96				6.78	7.53	0.22					99.17	65.9	32.8	1.3
LJ-B	plag	mid	c	62.47		23.52				4.87	8.89	0.17					99.92	76	23	1
LJ-B	plag	mid	d	61.07		24.18				5.68	8.63	0.11					99.67	72.9	26.5	0.6
LJ-B	bte	rim	a	34.61	3.75	16.24	24.71	6.01	0.44		0.07	9.48		0.07			95.38
LJ-B	bte	rim	a	34.59	3.7	16.3	24.99	6.04	0.5	0.02	0.07	9.49		0.09			95.79
LJ-B	bte	rim	b	34.68	3.6	16.37	24.58	6.27	0.49		0.04	9.47	0.03	0.05			95.58
LJ-B	bte	core	c	34.69	3.57	16.27	24.66	6.24	0.42		0.08	9.64	0.04	0.03	0.01		95.65
LJ-B	bte	rim	d	35.45	3.66	16.36	23.86	6	0.35		0.1	9.54	0.07	0.03	0.11		95.53
LJ-B	bte	core	d	35.05	3.43	16.16	24.32	6.41	0.43	0.01	0.09	9.31	0.01	0.03			95.25
LJ-B	bte	core	e	35.61	3.37	16.11	24.56	6.21	0.32	0.05	0.07	9.18		0.04	0.01		95.53
LJ-B	chl?			24.16	0.02	19.23	33.35	9.29	0.65	0.03		0.07		0.02	0.02		86.84
LJ-B	sph			30.84	27.79	7.67	1.7	0.23	0.06	27.51	0.04	0.19		0.2			96.23
LJ-B	epd	rim	a	37.24	0.22	24.58	10.82		0.5	22.63		0.02	0.05				96.06
LJ-B	epd	rim	b	37.49	0.54	22.43	12.53	0.04	0.15	23.07			0.01	0.04	0.03		96.33
LJ-B	epd	core	b	37.12	0.26	22.96	12.99		0.2	22.6				0.07	0.02		96.22
7-31-5	plag	rim	a	61.51		24.58				5.72	7.6	0.17					99.58	69.89	29.06	1.04
7-31-5	plag	mid	a	60.34		24.07				6.08	8.53	0.16					99.18	71.13	27.99	0.88
7-31-5	plag	core	a	59.2		25.26				7.33	7.83	0.19					99.81	65.24	33.74	1.02
7-31-5	plag	core	b	59.56		25.2				7.12	7.63	0.18					99.69	65.32	33.68	1.01
7-31-5	plag	mid	b	60.75		24.77				6.52	8.21	0.12					100.37	69.01	30.3	0.69
7-31-5	plag	rim	b	60.74		24.2				5.93	8.64	0.11					99.62	72.08	27.33	0.58
7-31-5	plag	rim	c	60.88		24.15				5.49	9.02	0.25					99.79	73.81	24.84	1.34
7-31-5	plag	mid	c	60.31		24.35				5.92	8.94	0.23					99.75	72.29	26.46	1.24
7-31-5	plag	mid	c	60.26		24.37				5.74	8.91	0.28					99.56	72.62	25.86	1.52
7-31-5	plag	rim	c	59.48		24.77				6.37	8.7	0.16					99.48	70.6	28.57	0.83
7-31-5	plag	rim	d	67.65		19.87				0.33	11.78	0.1					99.73	97.93	1.53	0.54
7-31-5	bte	rim	a	35.71	3.94	15.33	23.76	7.72	0.41		0.15	9.32			0.04		96.38
7-31-5	bte	core	a	35.43	3.97	15.06	24.23	7.58	0.4	0.01	0.11	9.31	0.05		0.02		96.17
7-31-5	bte	mid	b	34.8	4.09	14.76	24.31	7.38	0.47	0.05	0.12	9.32	0.02	0.07	0.04	0.02	95.45
7-31-5	sph		a	31.16	36.54	2.03	0.79	0.02	0.12	28.6	0.07				0.03		99.36
7-31-5	sph		b	30.88	36.26	2.04	0.77	0.02	0.09	28.46	0.047	0.01		0.04	0.02		98.637
7-31-5	sph		c	31.07	36.95	1.74	0.74	0.05	0.11	28.43	0.04	0.02			0.04		99.19
7-31-5	epd		a	37.41	0.34	20.72	14.2	0.16	0.28	22.92	0.03	0.16		0.02	0.03		96.27
7-31-5	epd		b	38.39		21.36	14.28	0.01	0.12	23.53	0.04	0.02	0.02	0.03			97.8
7-31-5	epd		c	38.34	0.17	24.42	11.55	0.04	0.99	22.26	0.04		0.01		0.02		97.84
7-31-5	epd		d	38.24	0.18	22.25	12.72	0.02	0.52	23.11	0.05	0.01	0.05				97.15
7-31-5	chl			26.19	0.06	19.63	28.32	11.48	0.65	0.13	0.09	0.09	0.05			0.08	86.77
LJ-M1	plag	rim	a	63.38		23.22	0.02			4.67	8.85	0.15					100.29	76.2	22.9	0.9
LJ-M1	plag	mid	a	62.03	0.01	23.77				5.37	8.33	0.18					99.69	72.9	26	1.1
LJ-M1	plag	mid	a	62.11	0.02	24.25				5.42	8.45	0.14					100.39	73.3	25.9	0.8
LJ-M1	plag	rim	a	63.33		23.1				4.49	8.99	0.21					100.12	77.4	21.3	1.2
LJ-M1	bte	core	a	35.44	3.55	16.84	23.29	6.47	0.38		0.05	9.4		0.04			95.46
LJ-M1	bte	rim	b	35.39	3.32	16.7	23.53	6.43	0.42	0.04	0.1	9.26		0.03	0.02		95.24
LJ-M1	bte	core	b	35.39	3.49	16.74	23.2	6.49	0.38	0.02	0.07	9.46					95.24
LJ-M1	bte	rim	b	35.2	3.31	17.45	23.09	6.25	0.44	0.03	0.11	9.28			0.04		95.2
LJ-M1	mu		a	47.57	0.42	29.82	5.12	1.64		0.02	0.19	10.39	0.03	0.01			95.21
LJ-M1	mu		b	47.08	0.55	31.74	3.72	1.08		0.01	0.31	10.35		0.03			94.87
LJ-M1	epd	rim		37.81	0.09	23.12	11.79	0.01	0.46	22.35	0.01	0.03	0.01	0.01	0.03		95.72
LJ-M1	epd	core		37.87	0.33	23.01	12.04	0.02	0.2	22.53		0.02		0.1			96.12
LJ-M1	ilm			0.33	52.12	0.31	36.49		2.86	0.6			0.07	0.23			93.01
LJ-M2	plag	rim	a	63.45		23				4.61	9.38	0.12					100.56	78.12	21.22	0.66
LJ-M2	plag	core	a	61.01		24.37				5.58	8.81	0.3					100.07	72.88	25.51	1.62
LJ-M2	plag	mid	b	61.91		23.62				4.91	9.36	0.28					100.08	76.36	22.16	1.49
LJ-M2	plag	rim	c	62.11		23.38				4.96	9.16	0.2					99.81	76.14	22.78	1.07
LJ-M2	ksp	rim	a	65.3		18.33				0.01	1.02	15.25					99.91	9.2	0.05	90.75
LJ-M2	ksp		b	65.13		18.51				0.01	1.04	15.35					100.04	9.31	0.05	90.64
LJ-M2	ksp		c	64.92		18.17					0.76	15.52					99.37	6.93	0	93.07
LJ-M2	bte	rim	a	34.54	2.83	16.83	24.85	5.6	0.49	0.02	0.13	9.26	0.18			0.04	94.77
LJ-M2	bte	mid	a	35.02	3.1	16.86	24.72	5.88	0.46		0.17	9.48	0.04		0.06		95.79
LJ-M2	bte	core	a	34.44	3.15	16.74	24.27	5.78	0.45	0.01	0.11	9.24	0.01			0.03	94.23
LJ-M2	bte	core	b	34.81	3.17	16.62	24.53	5.91	0.57	0.05	0.16	9.37	0.01			0.02	95.22
LJ-M2	bte	rim	b	34.16	2.88	16.86	25.13	5.85	0.5	0.01	0.1	9.38	0.05			0.04	94.96
LJ-M2	bte	core	c	34.57	3.08	17.44	24.81	5.59	0.49	0.02	0.12	9.33	0.01				95.46
LJ-M2	bte	mid	c	34.32	3.1	17.68	24.12	5.49	0.4		0.13	9.57	0.02		0.02	0.05	94.9
LJ-M2	bte	rim	c	34.25	3.13	17.64	24.64	5.49	0.46		0.09	9.47	0.03			0.02	95.22
LJ-M2	mu	rim	a	45.22	0.57	33.45	3.16	0.81	0.03		0.47	10.46		0.02		0.06	94.25
LJ-M2	mu	core	a	45.42	0.66	33.36	2.81	0.86			0.47	10.35				0.07	94
LJ-M2	mu	rim	b	45.46	0.49	34.01	2.74	0.75			0.42	10.24				0.05	94.16
LJ-M2	mu	mid	b	45.26	0.67	32.94	3.16	0.91			0.4	10.64				0.06	94.04
LJ-M2	mu	core	b	45.39	1.02	32.86	2.83	0.82	0.01		0.51	10.55				0.05	94.04
LJ-M2	epd			38.18	0.04	23.34	12.13	0.01	0.16	23.66	0.07	0.02	0.01		0.02		97.64
LJ-M2	epd			37.68	0.43	23.97	10.7	0.03	0.16	23.57	0.04	0.02	0.01				96.61
Other La Posta-type plutons
7-28-3	plag	rim	a	65.8		21.18				2.65	9.91	0.17					99.71	86.3	12.8	1
7-28-3	plag	mid	a	62.48	0.01	22.38				4.29	9.76	0.14					99.06	79.9	19.4	0.7
7-28-3	plag	mid	a	62.87	0.02	22.39				4.32	9.69	0.1					99.39	49.8	19.7	0.6
7-28-3	plag	rim	b	62.09		22.84				4.46	9.5	0.16					99.05	78.7	20.4	0.9
7-28-3	plag	mid	b	62.11		23.2				4.72	9.32	0.17					99.52	77.4	21.6	0.9
7-28-3	plag	core	b	62.02		23.05				5	9.18	0.23					99.48	75.9	22.8	1.2
7-28-3	plag	mid	c	61.22		23.76	0.01			5.56	9.09	0.12					99.76	74.3	25.1	0.6
7-28-3	plag	mid	c	61.45		23.41				5.45	8.94	0.21					99.46	74	24.9	1.1
7-28-3	plag	mid	c	61.48		23.22	0.01			5.35	9.2	0.17					99.43	75	24.1	0.9
7-28-3	plag	rim	c	67.48		19.55				0.35	12.01	0.16					99.55	97.6	1.6	0.9
7-28-3	bte	rim	a	37.84	3.28	14.37	17.6	12.33	0.7		0.1	9.51		0.05	0.04	0.33	96.14
7-28-3	bte	core	a	38,70	3.06	13.97	17.94	12.9	0.67		0.09	9.51		0.03	0.04	0.45	97.37
7-28-3	bte	rim	a	38.61	2.97	14.38	17.75	13.18	0.63	0.02	0.11	9.47		0.07	0.03	0.4	97.61
7-28-3	bte	rim	b	38.79	2.77	14.04	17.82	12.76	0.66	0.03	0.11	9.61		0.01	0.08	0.42	97.08
7-28-3	bte	core	b	37.91	2.81	14.21	18.67	12.25	0.8	0.01	0.15	9.34	0.02	0.02	0.03	0.22	96.44
7-28-3	bte	rim	b	37.35	3.16	13.57	17.81	12.09	0.6	0.01	0.09	9.32		0.08	0.12	0.18	94.38
7-28-3	bte	rim	c	38.01	3	14.61	17.57	12.33	0.65	0.05	0.14	9.03			0.05	0.3	95.73
7-28-3	bte	core	c	37.38	3.33	14.26	18.1	11.69	0.66	0.03	0.16	9.36		0.07	0.06	0.4	95.51
7-28-3	bte	rim	c	36.64	3.25	14.59	17.29	11.59	0.69	0.05	0.16	9.24		0.05	0.07	0.48	94.12
7-28-3	sph	rim	a	29.75	38.35	1.55	1.24	0.02	0.22	27.82	0.03	0.01		0.28	0.06	0.17	99.5
7-28-3	sph	core	a	31.15	37.54	1.67	1.58	0.02	0.14	27.16	0.02			0.14	0.07	0.5	99.97
7-28-3	sph	core	b	31.36	37.89	1.53	1.29	0.03	0.18	27.81	0.02			0.12	0.08	0.35	100.64
7-28-3	sph	rim	b	30.6	36.89	1.81	1.95	0.03	0.18	26.56	0.06	0.01		0.11	0.06	0.4	98.65
7-28-3	mt	core			0.09	0.9	86.27	0.03	0.2		0.04		0.06	0.13	0.08		87.8
7-28-3	mt	rim			0.03	0.26	86.2	0.02	0.1	0.01	0.02	0.02	0.08	0.16	0.04		86.94
7-28-4	amp	rim	a	49.1	0.71	5.61	14.86	13.28	0.62	11.71	1.15	0.52		0.02	0.03		97.6
7-28-4	amp	core	a	46.87	1.2	7.62	15.89	12.03	0.68	11.54	1.39	0.7	0.02				97.94
7-28-4	amp	mid	b	46.36	1.12	7.42	15.76	11.74	0.75	11.44	1.37	0.7	0.02	0.03			96.7
7-28-4	amp	core	c	48.29	0.74	6.02	15.19	13.14	0.66	11.72	1.25	0.61		0.04			97.65
7-28-4	amp	rim	c	48.29	0.68	5.93	14.19	13.34	0.62	12.08	1.07	0.53		0.02			97.41
7-28-4	bte	rim	a	36.55	3.82	14.15	17.75	11.81	0.58	0.03	0.09	9.42		0.06	0.03		94.28
7-28-4	bte	core	a	36.56	3.41	14.37	17.83	12.1	0.44		0.11	9.37		0.04			94.22
7-28-4	chl			27.64	0.05	18.18	222.36	17.38	0.61	0.02		0.02		0.04			86.29
7-28-4	sph		a	29.71	38.8	1.16	1.32	0.01	0.09	27.15		0.02	0.04				98.31
7-28-4	sph		b	29.86	37.87	1.2	1.52		0.09	27.43	0.01	0.07					98.04
7-28-4	mt	core	a		0.03	0.07	92.53	0.03	0.34		0.08		0.05	0.28	0.09		93.5
7-28-4	mt	rim	a		0.04	0.09	90.85	0.03	0.36	0.17	0.07	0.01		0.32	0.07		92.01
7-28-4	mt	rim	b		0.07	0.09	91.66		0.17	0.03	0.03	0.02	0.04	0.24	0.04		92.37
7-28-4	mt	core	b		0.02	0.29	91.72		0.15			0.02	0.08	0.23	0.02		92.54
7-28-5	plag	rim	a	62.28	0.02	23.01				4.77	9.01	0.25					99.34	76.3	22.3	1.4
7-28-5	plag	core	a	60.65	0.03	24.31				6.09	8.51	0.23					99.82	70.8	27.9	1.3
7-28-5	plag	mid	a	60.4		24.3				5.79	8.67	0.18					99.34	72.3	26.7	1
7-28-5	ksp			62.77	0.02	20.86			0.01	3.06	4.26	8.12					99.1	37.7	14.9	47.3
7-28-5	amp	rim	a	46.15	1.31	7.55	16.12	11.57	0.52	11.68	1.43	0.76	0.05			0.24	97.36
7-28-5	amp	mid	a	47.1	1.27	7.58	15.65	11.61	0.42	11.85	1.34	0.74		0.05			97.26
7-28-5	amp	core	a	47.5	1.28	7.42	15.24	12.29	0.54	11.72	1.41	0.64		0.03			98.07
7-28-5	amp	rim	a	47.12	1.15	7.89	16.24	11.83	0.55	11.68	1.31	0.73		0.05	0.04		98.59
7-28-5	bte	rim	a	37.47	2.19	15.58	17.36	12	0.38	0.02	0.09	9.58		0.02			94.69
7-28-5	bte	core	a	37.14	3.2	14.72	18.06	11.68	0.37		0.1	9.41		0.05			94.74
7-28-5	bte	rim	a	37.32	3.31	14.7	18.46	11.22	0.31	0.04	0.1	9.36		0.07			94.87
7-28-5	bte	rim	b	37.63	3.26	14.51	18.92	11.68	0.32	0.02	0.11	9.57		0.03			96.04
7-28-5	bte	core	b	37.12	3.37	14.57	18.32	11.24	0.32	0.02	0.12	9.53		0.04			94.65
7-28-5	bte	rim	b	37.01	3.68	14.62	18.72	11.19	0.33	0.01	0.09	9.46		0.04			95.14
7-28-5	sph	core	a	30.62	38.63	1.19	0.77		0.1	27.74	0.01	0.02					99.07
7-28-5	sph	rim	a	30.97	38.54	1.11	0.82	0.01	0.07	27.6	0.02	0.01			0.02		99.18
7-28-5	sph	core	b	30.87	37.53	1.32	1.13		0.04	28.01	0.02				0.01		98.94
7-28-5	sph	rim	b	31.03	37.24	1.61	1.38	0.02	0.03	27.99	0.03				0.02		99.35
7-28-5	mt	rim			0.06	0.05	92.01	0.01	0.05	0.01		0.02	0.04	0.19			92.42
7-28-5	mt	core		0.01	0.01	0.07	91.92	0.02	0.07	0.01	0.02	0.01	0.06	0.25			92.45
7-28-5	mt	rim			0.07	0.03	90.77		0.07	0.01	0.02	0.02	0.14	0.21	0.01	0.05	91.4
7-29-2	plag	rim	a	62.161		22.81	0.01	0.02	0.01	4.56	9.78	0.12					99.471	79	20.4	0.6
7-29-2	plag	mid	a	60.7		23.87				5.4	9.04	0.21					99.22	74.3	24.6	1.1
7-29-2	plag	mid	a	59.06		24.81				6.92	8.29	0.19					99.27	67.7	31.2	1
7-29-2	plag	core	a	58.79		25.17				6.86	8.22	0.16					99.2	67.8	31.3	0.8
7-29-2	plag	rim	b	62.78		22.95				4.61	9.24	0.23					99.81	77.4	21.4	1.3
7-29-2	plag	mid	b	62.31		22.97				4.55	9.7	0.16					99.69	78.7	20.4	0.9
7-29-2	plag	mid	b	61.3		23.45				4.66	9.59	0.2					99.2	78	20.9	1.1
7-29-2	plag	mid	b	61.26		23.38	0.01			4.67	9.53	0.26					99.11	77.6	21	1.4
7-29-2	plag	mid	b	61.1		23.8				5.3	9.18	0.29					99.67	74.6	23.8	1.5
7-29-2	plag	core	b	58.29		25.47				7.2	8.05	0.16					99.17	66.3	32.8	0.9
7-29-2	plag	mid	b	59.29		24.9				6.51	8.45	0.11					99.26	69.7	29.7	0.6
7-29-2	amp	rim	a	48.38	0.86	6.49	15.72	12.18	0.46	12.16	1.11	0.6	0.06	0.02	0.1	0.32	98.46
7-29-2	amp	core	a	46.73	1.29	7.07	16.84	11.74	0.53	11.75	1.36	0.57		0.03	0.05	0.52	98.48
7-29-2	amp	rim	a	50.17	0.59	5.29	15.61	13.23	0.52	11.95	1.02	0.41			0.07	0.16	99.02
7-29-2	amp	mid	b	48.58	0.92	6.57	16.09	11.84	0.36	12.17	1.17	0.6	0.02	0.04	0.06	0.04	98.46
7-29-2	amp	mid	c	47.61	1.32	7.49	16.58	11.8	0.42	11.62	1.36	0.51	0.04	0.03	0.07	0.31	99.16
7-29-2	amp	core	d	47.11	1.42	7.55	16.64	11.43	0.48	12.08	1.33	0.75	0.03	0.06	0.02	0.24	99.14
7-29-2	amp	rim	d	47.43	1.18	6.79	16.92	11.54	0.45	11.75	1.38	0.73			0.05	0.17	98.39
7-29-2	bte	rim	a	37.29	2.82	14.59	18.83	11.36	0.22	0.2	0.13	8.34	0.01	0.04	0.13		93.96
7-29-2	bte	core	a	36.62	2.93	14.65	19.05	11.05	0.25	0.16	0.13	8.38	0.05	0.03			93.3
7-29-2	bte	core	b	36.08	2.85	14.42	18.74	11.52	0.26	0.04	0.1	8.72	0.05	0.05	0.06	0.55	93.44
7-29-2	bte	rim	b	36.32	3.11	14.41	19.31	11.45	0.34	0.11	0.14	8.56		0.08	0.1	0.54	94.47
7-29-2	bte	rim	c	36.74	3.7	14.52	19.07	10.87	0.29		0.13	9.03	0.05	0.06		0.33	94.79
7-29-2	bte	core	c	36.32	3.64	14.62	19.45	10.92	0.29		0.15	9.14	0.11	0.09	0.05	0.53	95.31
7-29-2	bte	rim	c	35.82	3.18	14.52	18.81	10.98	0.33	0.04	0.11	9.06	0.07	0.02	0.08	0.73	93.75
7-29-2	bte	mid	d	37.2	3.26	15.08	18.55	10.56	0.27	0.09	0.12	8.56		0.02	0.03	0.09	93.83
7-29-3	plag	rim	a	65.42		20.82				1.47	11.63	0.08					99.42	93.1	6.5	0.4
7-29-3	plag	rim	b	65.65		20.84				1.5	11.61	0.28					99.88	92	6.6	1.4
7-29-3	plag	rim	c	60.29		24.59				6.36	8.47	0.23					99.94	69.8	29	1.3
7-29-3	plag	mid	c	59.64	0.01	24.34				6.24	8.76	0.29					99.28	70.7	27.8	1.5
7-29-3	plag	mid	c	59.44	0.01	24.7				6.52	8.74	0.22					99.63	70	28.9	1.2
7-29-3	plag	mid	c	59.66	0.02	25.1				6.48	8.57	0.22					100.05	69.7	29.1	1.2
7-29-3	plag	core	c	57.77		25.68				7.83	8.1	0.14					99.52	64.7	34.6	0.7
7-29-3	plag	rim	d	60.43	0.01	24.37				6.21	8.64	0.18					99.84	70.9	28.2	1
7-29-3	plag	mid	d	59.52		24.52				6.7	8.53	0.33					99.6	68.5	29.7	1.7
7-29-3	plag	mid	d	60.14		24.49				6.29	8.34	0.35					99.61	69.3	28.9	1.9
7-29-3	plag	core	d	57.56		26.02				8.24	7.45	0.2					99.47	61.4	37.5	1.1
7-29-3	plag	mid	d	60.54		24.08				6.05	8.91	0.19					99.77	72	27	1
7-29-3	plag	rim	d	60.59	0.02	23.96				5.74	9.03	0.2					99.54	73.2	25.7	1.1
7-29-3	amp	rim	a	48.58	1.14	6.71	15.65	11.92	0.46	11.93	1.11	0.59		0.03	0.11	0.46	98.69
7-29-3	amp	core	a	48.53	1.12	6.65	16.04	12.09	0.44	12.01	1.18	0.54	0.05	0.05	0.06	0.76	99.52
7-29-3	amp	rim	a	47.87	1.13	7.76	16.49	11.6	0.4	12.06	1.21	0.67	0.01	0.02	0.04	0.06	99.32
7-29-3	amp	rim	b	47.43	1.25	6.98	16.25	12.11	0.47	11.77	1.19	0.55	0.02	0.02	0.03	0.41	98.48
7-29-3	amp	core	b	46.67	1.46	7.8	16.98	11.25	0.45	11.91	1.51	0.7	0.01	0.03		0.49	99.26
7-29-3	amp	rim	b	47.87	1.31	7	16.72	11.97	0.47	11.42	1.15	1.11	0.04	0.02	0.01	0.39	99.48
7-29-3	amp	rim	c	46.96	1.27	7.14	16.68	11.65	0.48	12.07	1.33	0.67		0.02	0.04	0.06	98.37
7-29-3	amp	core	c	47.83	1.2	6.99	16.55	12.01	0.49	11.94	1.3	0.55	0.05	0.03	0.05	0.19	99.18
7-29-3	amp	rim	c	48.28	1.17	6.45	16.46	12.01	0.4	12.1	1.18	0.63		0.03	0.07	0.11	98.89
7-29-3	bte	rim	a	37.38	3.62	14.65	19.58	10.76	0.3		0.15	9.57	0.06	0.04	0.12		96.23
7-29-3	bte	core	a	37.27	3.59	14.69	19.28	11.05	0.36		0.13	9.57	0.06	0.06	0.05	0.44	96.55
7-29-3	bte	rim	a	37.54	3.68	14.4	19.04	10.99	0.28	0.01	0.13	9.65		0.07	0.1		95.89
7-29-3	bte	rim	b	36.93	3.66	14.64	18.83	11.02	0.21	0.02	0.14	9.36	0.05		0.02		94.88
7-29-3	bte	core	b	37.74	3.74	14.27	19.4	10.91	0.35	0.01	0.1	9.57		0.03	0.06		96.18
7-29-3	bte	rim	b	37.45	3.57	14.67	19.11	10.79	0.26	0.01	0.12	9.36		0.06	0.02	0.44	95.86
7-29-3	bte	rim	c	37.74	3.7	14.47	18.95	11.16	0.27	0.01	0.14	9.41		0.03	0.1	0.1	96.08
7-29-3	bte	core	c	37.4	3.91	14.03	18.84	11.1	0.3		0.15	9.38	0.03	0.03	0.07	0.42	95.66
7-29-3	bte	rim	c	37.75	3.75	14.33	18.8	10.91	0.22		0.11	9.62	0.08	0.05	0.04	0.45	96.11
7-29-3	mu	rim	a	48.09		34.14	2.13	0.81	0.02		0.2	10.77			0.09		96.25
7-29-3	mu	core	a	47.68	0.02	34.38	1.79	0.82	0.01		0.35	10.67			0.07	0.55	96.34
7-29-3	mu	rim	a	47.3	0.12	33.35	1.43	0.88	0.04	0.04	0.42	10.22			0.09		93.89
7-29-3	mu	core	b	48.22	0.02	29.92	3.56	2.34	0.08		0.22	10.8	0.02		0.09	0.19	95.46
7-29-3	mu	rim	b	47.83	0.03	31.44	2.5	1.78	0.01		0.29	10.6	0.03		0.09	0.16	94.76
7-29-5	plag	rim	a	62.25		22.76				5.83	8.51	0.19					99.54	71.8	27.2	1.1
7-29-5	plag	mid	a	61.64		23.2				6.54	8.19	0.21					99.78	68.8	30.3	1.2
7-29-5	plag	mid	a	61.37		23.29				6.43	8.36	0.19					99.64	69.5	29.5	1
7-29-5	plag	core	a	61.78		23.34				6.63	7.93	0.18					99.86	67.7	31.3	1
7-29-5	plag	rim	b	62.43		22.6				5.65	8.61	0.26					99.55	72.3	26.2	1.4
7-29-5	plag	mid	b	60.86	0.02	23.68				7	8	0.19					99.75	66.7	32.3	1
7-29-5	plag	mid	b	61.59		23.11				6.38	8.27	0.18					99.53	69.4	29.6	1
7-29-5	plag	core	b	59.2		24.73				8.22	7.3	0.19					99.64	61	38	1
7-29-5	amp	rim	a	49.97	1.04	4.85	14.33	12.8	0.44	12.47	1.06	0.55	0.05		0.04		97.6
7-29-5	amp	core	a	50.78	0.86	4.32	13.64	13.3	0.37	12.39	0.88	0.45	0.08		0.06		97.13
7-29-5	amp	rim	a	49.93	1	4.68	14.46	12.98	0.36	12.43	1.05	0.52	0.09		0.05		97.55
7-29-5	amp	rim	b	51.84	0.76	4.13	13.83	13.32	0.35	12.49	0.88	0.47	0.01		0.05		98.13
7-29-5	amp	core	b	52.53	0.56	3.81	13.52	13.7	0.43	12.55	0.7	0.43	0.05	0.01	0.08		98.37
7-29-5	amp	rim	b	51.02	0.83	4.7	14.33	12.88	0.28	12.38	0.95	0.57	0.03		0.04		98.01
7-29-5	amp	rim	c	52.77	0.73	3.42	12.99	13.76	0.39	12.3	0.73	0.34	0.01		0.08		97.52
7-29-5	amp	core	c	51.66	0.73	4.36	14.02	13.07	0.33	12.32	0.84	0.49	0.05		0.1		97.97
7-29-5	amp	rim	c	50.52	1.02	4.87	14.16	12.45	0.38	12.29	0.96	0.58	0.09	0.04	0.04		97.4
7-29-5	bte	rim	a	37.94	3.39	13.22	17.48	12.01	0.29	0.03	0.07	9.2	0.06		0.09		93.78
7-29-5	bte	core	a	37.61	3.35	13.16	17.42	12.1	0.29	0.05	0.09	9.32	0.07		0.08		93.54
7-29-5	bte	rim	b	38.49	3.39	13.32	17.51	11.71	0.21	0.04	0.09	9.04	0.08	0.07	0.11		94.06
7-29-5	bte	core	b	38.41	3.47	13.31	17.14	11.63	0.25	0.02	0.07	9.2	0.06	0.06	0.07		93.69
7-29-5	bte	rim	b	38.43	3.48	13.12	17.35	11.64	0.23	0.02	0.07	9.33	0.06	0.06	0.04		93.83
7-29-5	bte	rim	c	38.54	3.63	13.26	17.49	11.74	0.26	0.07	0.11	9.44	0.07	0.05	0.07		94.73
7-29-5	bte	core	c	38.42	3.75	13.23	17.8	11.96	0.24	0.02	0.06	9.21	0.07	0.04	0.09		94.89
7-29-5	bte	rim	c	38.39	3.62	13.34	17.26	11.94	0.28	0.03	0.09	9.25	0.03	0.05	0.11		94.39
7-29-5	bte	rim	d	38.57	3.43	13.13	17.27	11.54	0.25	0.06	0.05	9.28	0.08	0.03	0.07		93.76
7-29-5	sph		a	30.64	39.55		0.6	0.04	0.08	28.03	0.04	0.02	0.03	0.1	0.05		99.18
7-29-5	sph		b	31.42	38.93		0.61	0.01	0.1	27.43	0.04	0.01	0.01	0.25	0.1		98.91
7-29-5	sph		c	31.33	38.99		0.64	0.03	0.13	27.05	0.06	0.01	0.01	0.19	0.02		98.46
7-29-6	plag	rim	a	62.8		22.56				5.23	8.63	0.27					99.49	73.8	24.7	1.5
7-29-6	plag	mid	a	62.63		22.78				5.24	8.62	0.34					99.61	73.4	24.6	2
7-29-6	plag	core	a	60.96	0.01	23.85				6.81	7.96	0.26					99.85	66.9	31.7	1.5
7-29-6	plag	rim	b	61.64		23.32				6.24	8.44	0.22					99.86	70.2	28.7	1.2
7-29-6	plag	mid	b	60.41		24.09				7.05	8.03	0.22					99.8	66.5	32.3	1.2
7-29-6	plag	mid	b	60.75		24.06				7.07	7.83	0.26					99.97	65.7	32.8	1.4
7-29-6	plag	core	b	60.14	0.01	24.21				7.12	7.83	0.32					99.63	65.4	32.9	1.8
7-29-6	plag	mid	b	60.33		24.18				6.75	8.01	0.24					99.51	67.3	31.4	1.3
7-29-6	plag	mid	b	59.96		24.53				7.14	7.58	0.28					99.49	64.7	33.7	1.6
7-29-6	plag	rim	b	62.29		23.13				5.79	8.22	0.26					99.69	70.9	27.6	1.5
7-29-6	plag	rim	c	63.01		22.24				5.14	8.76	0.25					99.4	74.5	24.2	1.4
7-29-6	plag	mid	c	63.29		22.5				5.29	8.73	0.25					100.06	73.9	24.8	1.4
7-29-6	plag	mid	c	62.65	0.02	22.74				5.34	8.61	0.27					99.63	73.4	25.1	1.5
7-29-6	plag	rim	d	63.34	0.01	22.38				5.16	8.83	0.23					99.95	74.7	24	1.3
7-29-6	plag	mid	d	61.89	0.01	23.14				5.86	8.41	0.23					99.54	71.3	27.5	1.3
7-29-6	plag	core	d	61.7		23.3				6.2	8.13	0.22					99.55	69.5	29.3	1.2
7-29-6	ksp	mid	a	65		18.19		0.01	0.01	0.05	1.31	14.99					99.56	11.7	0.2	88.1
7-29-6	ksp	core	a	65.71	0.02	18.01			0.01	0.03	1.3	14.65					99.73	11.9	0.2	87.9
7-29-6	ksp	rim	a	65.05	0.02	17.83				0.02	0.72	15.61					99.25	6.5	0.1	93.3
7-29-6	bte	rim	a	38.34	2.87	13.74	18.98	10.44	0.3	0.05	0.11	9.43		0.06	0.02		94.34
7-29-6	bte	core	a	37.91	3.14	13.72	19.04	10.27	0.33	0.02	0.1	9.43		0.05	0.06		94.07
7-29-6	bte	rim	a	37.77	2.04	14.34	19.39	11.15	0.29	0.08	0.1	8.24		0.04			93.44
7-29-6	bte	rim	b	38.06	3.25	13.53	19.28	10.54	0.33	0.02	0.12	9.64	0.02	0.03	0.07		94.89
7-29-6	bte	core	b	37.33	3.25	13.54	18.76	10.14	0.37		0.11	9.55	0.03	0.07	0.05		93.2
7-29-6	sph		a	31.45	38.52	0.14	1.17	0.03	0.12	27.11	0.05	0.01		0.33	0.03		98.96
7-29-6	sph		a	31.56	38.24		0.96	0.04	0.15	26.93	0.06	0.01		0.37	0.06		98.38
7-29-7	plag	rim	a	62.14	0.01	23.45	0.03			4.81	9.21	0.14		0.02			99.81	77	22.2	0.8
7-29-7	plag	mid	a	58.99		26.84		0.01		6.74	7.55	0.29					100.42	65.9	32.5	1.6
7-29-7	plag	mid	a	58.13		26.22				8.07	7.32	0.2					99.94	61.4	37.5	1.1
7-29-7	plag	core	a	58.36		26.16				8.18	7.56	0.13					100.39	62.2	37.1	0.7
7-29-7	plag	mid	b	57.2		26.92				8.97	7	0.2					100.29	57.9	41	1.1
7-29-7	plag	mid	c	61.17	0.02	23.75				5.04	9.44	0.16					99.58	76.5	22.6	0.9
7-29-7	ksp	mid	a	64.9		18.42				0.09	1.2	15.05		0.01			99.67	10.7	0.5	88.8
7-29-7	ksp	mid	a	64.8		18.61				0.02	0.74	15.74					99.91	6.7	0.1	93.3
7-29-7	ksp	mid	b	65.1	0.01	18.07					0.6	15.92					99.7	5.4	0	94.6
7-29-7	ksp	core	b	65.18		18.33					0.51	16.08					100.1	4.6	0	95.4
7-29-7	ksp	mid	c	62.24		24.88				4.24	8.7	0.15					100.21	78.1	21.1	0.9
7-29-7	ksp	rim	c	65.62	0.02	21.53				2.3	10.86	0.06					100.39	89.2	10.5	0.3
7-29-7	amp	core	a	46.06	1.09	8.2	18.52	9.7	0.57	11.48	1.25	0.72		0.06			97.65
7-29-7	amp	rim	a	45.77	1.25	8.33	18.12	9.9	0.48	11.6	1.35	0.59		0.05			97.44
7-29-7	amp	core	b	45.65	1.32	8.49	17.91	9.86	0.59	11.53	1.52	0.6		0.02	0.03	0.04	97.56
7-29-7	amp	rim	b	45.82	1.26	7.99	18.27	9.71	0.57	11.59	1.35	0.72		0.02			97.3
7-29-7	amp	core	c	45.2	1.47	8.81	18.22	9.79	0.61	11.41	1.42	0.56	0.02	0.03	0.03		97.57
7-29-7	bte	rim	a	36.44	3.76	14.82	22	8.66	0.3	0.01	0.06	9.4					95.45
7-29-7	bte	rin	b	36.45	3.48	15.23	21.91	8.5	0.32	0.04	0.09	9.28					95.3
7-29-7	bte	core	c	35.56	3.58	15.23	21.52	8.9	0.37	0.03	0.09	9.38					94.66
7-29-7	bte	rim	c	35.45	3.3	15.28	21.64	8.93	0.31	0.02	0.07	9.42					94.42
7-29-7	sph	core	a	30.73	38.18	1.8	0.65		0.02	28.54	0.02	0.01			0.04		99.99
7-29-7	sph	rim	a	30.76	37.55	2.55	1.02		0.02	28.31	0.01	0.03					100.25
EL Topo Pluton
7-30-3	plag			60.7		24.84				6.82	8.17	0.14					100.67	67.88	31.34	0.78
7-30-3	plag			61.6		24.03				6.4	8.43	0.14					100.6	69.88	29.34	0.78
7-30-3	plag			61.35		24				6.39	8.33	0.12					100.19	69.76	29.57	0.67
7-30-3	plag			60.93		23.92				6.48	8.4	0.11					99.84	69.71	29.7	0.59
7-30-3	plag			61.32		23.76				6.04	8.59	0.18					99.89	71.35	27.69	0.95
7-30-3	plag			60.94		23.98				6.56	8.23	0.15					99.86	68.84	30.33	0.84
7-30-3	plag			60.99		24.04				6.19	8.37	0.14					99.73	70.45	28.79	0.76
7-30-3	plag			61.15		24.08				6.52	8.24	0.22					100.21	68.76	30.06	1.18
7-30-3	amp	rim	a	42.91	1.04	9.92	21.94	6.73	0.81	11.5	1.27	1.12	0.03	0.04			97.31
7-30-3	amp	mid	a	42.31	0.8	9.6	21.75	6.94	0.84	11.48	1.28	1.04	0.04	0.05			96.13
7-30-3	amp	core	a	46.02	0.84	8.18	21.64	7.63	1	11.54	1.14	0.86	0.02	0.02			98.89
7-30-3	amp	rim	b	41.65	1.09	10.04	21.91	6.79	0.84	11.47	1.39	1.2	0.02	0.07	0.06		96.53
7-30-3	amp	rim	b	41.31	1.1	10.21	22.5	6.81	0.76	11.74	1.32	1.14	0.04	0.04			96.97
7-30-3	amp	core	b	42.84	0.85	8.26	21.81	7.6	1.01	11.51	1.13	0.88	0.01	0.09			95.99
7-30-3	amp	core	b	43.07	1.09	7.8	21.97	7.39	0.86	11.52	1.25	0.82	0.02	0.06	0.02		95.87
7-30-3	bte	rim	a	36.01	3.41	15.1	24.93	7.29	0.5		0.15	9.22	0.05	0.04	0.03		96.73
7-30-3	bte	rim	a	35.09	3.47	15.06	24.54	7.2	0.47	0.02	0.15	9.04			0.02		95.06
7-30-3	bte	core	a	35.48	3.55	15.03	24.49	7.25	0.56	0.02	0.13	9.34	0.03	0.03	0.06	0.03	96
7-30-3	bte	rim	b	33.57	3.56	15.16	25.27	7.22	0.56	0.03	0.16	9.25	0.02	0.04		0.03	94.87
7-30-3	bte	core	b	35.82	3.59	15.25	24.53	7.4	0.49		0.15	9.41			0.07		96.71
7-30-3	bte	rim	c	34.49	3.16	15.44	24.64	7.28	0.5		0.17	9.23	0.02	0.04	0.05	0.03	95.05
7-30-3	bte	core	c	36.41	2.1	15.75	24.53	7.55	0.53	0.03	0.15	9.26	0.04	0.03	0.04	0.04	96.46
7-30-3	chl			24.48	0.12	20.3	31.37	9.62	0.95	0.03	0.09	0.09	0.06		0.02	0.04	87.17
7-30-3	chl			23.65	0.03	19.81	32.5	9.62	0.98	0.04	0.07	0.15	0.04	0.04		0.03	86.96
7-30-3	chl			24.68	0.06	19.86	32.39	9.48	0.89	0.02	0.06	0.13	0.02	0.04	0.03	0.05	87.71
ET-H	plag	rim		60.66		25.02				6.04	7.71	0.16					99.59	69.1	29.9	1
ET-H	plag	mid		59.9	0.04	25.41				6.67	7.08	0.1					99.2	65.4	34	0.6
ET-H	plag	mid		61.64	0.02	24.59				6.07	7.76	0.21					100.29	69	29.8	1.2
ET-H	bte	core	a	36.26	2.86	16.39	24.33	6.3	0.48		0.04	9.46		0.05			96.17
ET-H	bte	core	b	35.97	3.19	15.94	26.25	6.57	0.47	0.04	0.08	8.95		0.04			97.5
ET-H	bte	core	c	36.24	3.35	15.86	26.13	6.48	0.45	0.02	0.1	9.01	0.03	0.05			97.72
ET-H	bte	rim	c	35.95	3.46	15.59	26.31	6.59	0.45	0.1	0.1	9.22		0.09			97.86
ET-H	bte	rim	c	36.54	2.72	16.24	25.33	5.96	0.44	0.05	0.13	9.04		0.03	0.01		96.49
ET-H	bte	core	d	36.23	2.55	16.08	26.61	6.42	0.46	0.01	0.06	9.27		0.07			97.76
ET-H	bte	rim	d	35.94	2.73	15.7	25.76	6.61	0.44	0.01	0.04	9.47		0.06			96.76
ET-H	bte	core	e	36.02	3.46	15.7	25.84	0.51	0.5	0.01	0.07	9.29		0.04	0.07		91.51
ET-H	bte	rim	e	35.74	3.44	15.83	25.48	6.48	0.29	0.04	0.09	9.26		0.13	0.01		96.79
ET-H	bte	core	f	36.12	3.53	15.87	25.78	6.25	0.39	0.01	0.07	9.08		0.11	0.09		97.3
ET-H	bte	rim	f	35.87	3.27	15.98	26.19	6.65	0.36	0.01	0.1	9.11					97.54
ET-H	chl			25.82	0.02	19.81	34.14	9.16	0.73	0.04	0.05	0.07			0.03		89.87
ET-H	chl			25.64	0.18	19.96	34.8	8.54	0.57	0.16		0.13		0.01	0.03		90.02
ET-H	ilm			0.06	52.38	0.09	36.4	0.04	9.32	0.28			0.01		0.21		98.79
ET-B	plag	rim	a	62.53	0.02	23.24				4.81	8.47	0.17					99.24	75.4	23.6	1
ET-B	plag		a	62.38	0.04	23.54				5.02	8.41	0.23					99.62	74.2	24.5	1.3
ET-B	plag	rim	a	62.51		23.57				4.82	8.34	0.2					99.44	74.9	23.9	1.2
ET-B	plag	rim	b	62.2	0.04	23.52				5.03	8.46	0.18					99.43	74.6	24.5	1
ET-B	plag		b	62.4		23.79				5.21	8.25	0.17					99.82	73.4	25.6	1
ET-B	plag	core	b	62.34		23.69				5.4	7.85	0.13					99.41	71.9	27.3	0.8
ET-B	plag	rim	b	63.61	0.01	23.52				4.93	7.95	0.11					100.13	74	25.3	0.7
ET-B	bte	rim	a	35.82	2.85	15.39	27.16	6.27	0.62	0.06	0.11	9		0.12	0.06		97.46
ET-B	bte	core	a	35.89	3.03	15.43	26.27	6.31	0.69	0.02	0.07	9.31		0.02	0.06		97.1
ET-B	bte	rim	a	36.25	2.99	15.56	26.12	6.19	0.64	0.04	0.06	9		0.06			96.91
ET-B	bte	rim	b	35.82	2.8	15.57	26.66	6.26	0.61	0.07	0.08	9.19		0.06			97.12
ET-B	bte		b	35.74	2.84	15.29	27.42	6.3	0.7	0.04	0.11	8.94		0.16			97.54
ET-B	bte	core	b	35.96	2.73	15.35	26.52	6.09	0.59	0.06	0.08	9.06		0.01	0.07		96.52
ET-B	bte	rim	c	36.06	2.9	15.7	26.8	6.15	0.51		0.06	9.09	0.05	0.08			97.4
ET-B	bte	core	c	36.46	2.86	15.66	25.99	5.92	0.64	0.02	0.06	9.23		0.04	0.01		96.89
ET-B	bte	rim	d	36.05	2.55	15.93	25.47	6.32	0.61	0.03	0.05	9.23		0.09	0.02		96.35
Snoopy	plag	rim	a	62.87	0.01	24.01				5.47	8.04	0.22					100.62	71.7	26.9	1.3
Snoopy	plag	mid	a	62.89		24.24				5.17	7.74	0.25					100.29	71.9	26.6	1.5
Snoopy	plag	core	a	62.22	0.02	24.14				5.61	7.97	0.24					100.2	71	27.6	1.4
Snoopy	plag	mid	a	62.5		24.08				5.48	7.92	0.23					100.21	71.4	27.3	1.4
Snoopy	plag	rim	a	63.34	0.04	23.91				5	7.73	0.2					100.22	72.8	26	1.2
Snoopy	plag	rim	b	62.73		24.23				5.09	8.28	0.2					100.53	73.8	25	1.2
Snoopy	plag	rim	c	68.49	0.02	19.52				0.18	11.37	0.11					99.69	98.5	0.9	0.6
Snoopy	ksp	rim	a	65.02	0.01	18.45				0.41	15.84						99.73	3.7	0	96.3
Snoopy	ksp	mid	a	64.74		18.33			0.01		0.75	15.17		0.05			99.05	7	0	93
Snoopy	ksp	mid	a	65.33		18.43					0.58	15.33					99.67	5.4	0	94.6
Snoopy	bte	mid	a	36.67	2.81	15.55	26.17	6.4	0.73		0.06	9.3		0.02			97.71
Snoopy	bte	mid	a	36.26	3.02	15.36	26.32	6.64	0.65	0.02	0.09	9.37		0.03			97.76
Snoopy	bte	rim	a	36.22	2.38	15.91	26.58	6.53	0.65	0.03	0.06	9.43		0.06	0.01		97.86
Snoopy	bte	rim	b	37.15	2.28	16.01	25.34	6.13	0.68	0.11	0.07	8.49	0.06		0.03		96.35
Snoopy	bte	core	c	36.98	2.77	16.15	25.82	6.21	0.52		0.05	9.42	0.01	0.02			97.95
Snoopy	bte	rim	d	36.19	3.06	15.6	26.32	6.63	0.55	0.02	0.05	9.3	0.04	0.1			97.86
Snoopy	bte	mid	e	36.97	2.68	15.7	26.23	6.23	0.7	0.1	0.07	9.09	0.04				97.81
Snoopy	bte	mid	e	36.84	2.73	15.93	26.25	5.71	0.6	0.04	0.04	8.9	0.02	0.05	0.05		97.16
Snoopy	bte	mid	e	36.56	2.57	15.54	26.98	6.67	0.67	0.03	0.06	8.44	0.02	0.05			97.59
7-30-7	plag	rim	a	67.19		20.15				0.7	11.68	0.14					99.86	96.11	3.16	0.73
7-30-7	plag	mid	a	64		22.21				3.2	10.08	0.26					99.75	83.87	14.7	1.43
7-30-7	plag	mid	a	64.09		22.3				3.31	10.22	0.18					100.1	83.99	15.03	0.98
7-30-7	plag	core	a	64.46		21.85				3.08	10.33	0.14					99.86	85.21	14.04	0.75
7-30-7	plag	core	b	64.44		21.84				3.09	10.26	0.13					99.76	85.13	14.14	0.73
7-30-7	plag	rim	b	66.94		20.14				2.04	10.67	0.09					99.88	90.03	9.49	0.48
7-30-7	plag	core	c	64.82		21.86				3.15	10.09	0.14					100.06	84.6	14.6	0.79
7-30-7	plag	rim	c	68.34		19.26				0.49	11.72	0.09					99.9	97.29	2.25	0.46
7-30-7	plag	rim	d	65.33		21.18				2.72	10.23	0.14					99.6	86.51	12.72	0.77
7-30-7	ksp	rim	a	66		17.81				0.02	1.09	15.28					100.2	9.76	0.1	90.14
7-30-7	ksp		b	64.6		18.52					0.73	15.57					99.42	6.63	0	93.37
7-30-7	ksp		c	65.96		17.75					0.99	15.32					100.02	8.9		91.1
7-30-7	ksp		d	65.1		18.06				0.01	1.35	15.01					99.53	8.9	0.05	91.1
7-30-7	ksp		e	64.87		18.13					0.68	15.9					99.58	6.09	0	93.92
7-30-7	ksp		f	65.35		18.22				0.01	0.63	15.77					99.98	5.73	0.05	94.22
7-30-7	bte	core	a	35.08	2.2	18.99	26.32	3.77	0.43	0.11	0.15	8.76					95.81
7-30-7	bte	rim	a	34.43	2.17	18.51	26.16	3.74	0.42	0.12	0.13	8.64	0.07				94.39
7-30-7	bte	core	b	35.14	2.05	18.99	26.6	3.85	0.5	0.01	0.11	9.36	0.04		0.03		96.68
7-30-7	bte	mid	b	34.2	2.18	18.4	26.75	3.74	0.46	0.06	0.11	9.08	0.01			0.03	95.02
7-30-7	bte	rim	b	34.77	2.19	18.62	26.52	3.66	0.42		0.14	9.18	0.01		0.05		95.56
7-30-7	bte	rim	c	34.38	2.11	18.9	27.12	3.76	0.47	0.04	0.18	9.15	0.01				96.12
7-30-7	bte	mid	c	34.81	2.18	19.02	26.31	3.7	0.49	0.02	0.12	9.05	0.03	0.03		0.03	95.79
7-30-7	bte	core	c	34.27	2.13	18.8	26	3.74	0.45	0.01	0.12	8.99	0.04	0.03	0.01	0.05	94.64
7-30-7	bte	core	d	33.97	2.19	18.54	26.14	3.8	0.4		0.12	9.33	0.01			0.03	94.53
7-30-7	bte	mid	d	34.14	2.31	18.45	26.38	3.73	0.5	0.01	0.12	9.45			0.04	0.04	95.17
7-30-7	bte	mid	d	34.2	2.2	18.27	25.95	3.7	0.46	0.01	0.1	9.39	0.01	0.02			94.31
7-30-7	bte	rim	d	34.39	2.18	18.49	26.76	3.66	0.45	0.05	0.11	9.06	0.03	0.02		0.03	95.23
7-30-6	bte	rim	a	35.49	2.45	18.3	17.17	10.38	0.66	0.01	0.26	9.32	0.01		0.02	0.03	94.1
7-30-6	bte	core	a	36.01	2.63	18.17	17.4	10.92	0.47	0.02	0.22	9.21	0.09			0.05	95.19
7-30-6	mu	mid	a	45.33	1.04	34.95	0.97	0.78			0.61	10.29	0.02	0.02		0.06	94.07
7-30-6	mu	core	b	45.93	1.1	34.37	0.99	0.88			0.63	9.96	0.04	0.02	0.02	0.06	94
7-30-6	mu	rim	b	46.48	1.2	34.23	1.06	0.93			0.59	10.15	0.07	0.02		0.04	94.77
7-30-6	mu	rim	c	46.68	0.99	34.28	0.94	0.85	0.01		0.51	9.93	0.03	0.06			94.28
7-30-6	mu	rim	c	47.17	0.73	35.25	0.82	0.71			0.51	9.25	0.08	0.04	0.05		94.61
7-30-6	mu	rim	d	47.18	1.14	34.54	1	0.76	0.05		0.51	9.6		0.05			94.83
7-30-6	mu	core	d	47.12	1.08	34.56	0.81	0.79	0.07	0.01	0.57	9.77	0.03	0.03			94.84
7-30-6	mu	rim	e	47.32	1.19	34.76	1.09	0.74	0.05	0.01	0.52	9.8	0.1	0.07	0.09		95.74
7-30-6	mu	core	e	47.17	1.05	34.64	0.86	0.81	0.03	0.04	0.47	9.59	0.03	0.02	0.04		94.75
7-30-6	mu	rim	e	47.57	0.94	35.3	0.9	0.68		0.03	0.55	9.52	0.05	0.1			95.64
7-30-6	mu	core	f	47.58	1.1	34.77	0.95	0.78			0.56	9.89	0.01	0.05			95.69
7-30-6	mu	rim	f	47.86	0.87	34.88	0.95	0.74			0.47	9.78					95.55
El Pinal Pluton
EP	plag	core	a	56.2		26.96				9.41	6.8	0.1					99.47	56.3	43.1	0.6
EP	plag	mid	a	56.12		26.64				9.19	6.97	0.11					99.03	57.5	41.9	0.6
EP	plag	rim	a	59.89		24.4				5.96	9.07	0.07					99.39	73.1	26.5	0.4
EP	plag	core	b	56.42		26.69	0.01			9.86	6.31	0.12					99.41	53.3	46.1	0.7
EP	plag	rim	b	58.99		25.07				6.78	8.38	0.14					99.36	68.6	30.7	0.8
EP	plag	mid	c	58.63		24.8				7.69	7.93	0.15					99.2	64.6	34.6	0.8
EP	plag	mid	d	57.02		25.95				8.68	7.45	0.14					99.24	60.4	38.9	0.8
EP	ksp	rim	e	64.86		18.48				0.04	0.57	15.42					99.37	5.3	0.2	94.5
EP	ksp	core	e	63.86		19.08				0.08	0.43	15.74					99.19	3.9	0.4	95.7
EP	amp	rim	a	48.69	0.93	6.35	16.62	12.23	0.54	11.89	1.17	0.58		0.02	0.06	0.29	99.37
EP	amp	core	a	48.48	1.22	6.39	16.85	12.04	0.52	11.79	1.34	0.49	0.01	0.03	0.01	0.3	99.47
EP	amp	rim	b	47.94	1.3	7.1	17.08	11.23	0.58	11.64	1.41	0.51	0.01	0.03	0.07	0.56	99.46
EP	amp	core	b	48.63	1.14	6.97	17.33	11.65	0.53	11.83	1.38	0.47				0.44	100.37
EP	bte	rim	a	37.14	1.8	15.36	18.63	12.21	0.33	0.03	0.1	9.33		0.03	0.05	0.77	95.78
EP	bte	core	a	37.25	2.12	14.53	19.15	11.9	0.3	0.04	0.09	9.27		0.05		0.24	94.94
EP	bte	rim	a	37.99	2.26	14.27	18.18	11.93	0.28	0.01	0.12	9.47			0.02	0.27	94.8
EP	bte	rim	b	37.36	3.4	14.36	19.56	10.63	0.3	0.04	0.08	9.3	0.02	0.09	0.13	0.42	95.69
EP	bte	core	b	37.19	3.35	14.46	19.02	10.43	0.25	0.02	0.09	9.44	0.07	0.05	0.05	0.16	94.58
EP	bte	rim	b	37.4	3.27	14.31	20.48	10.91	0.27		0.13	9.48		0.05	0.07		96.37
EP	bte	rim	c	37.95	2.87	14.98	19.64	10.71	0.3		0.1	9.26		0.1	0.06		95.97
EP	bte	core	c	37.02	2.87	14.18	19.26	10.84	0.29	0.02	0.08	9.18	0.01	0.03	0.05	0.3	94.13
EP	bte	rim	c	37.36	2.24	14.26	19.59	11.27	0.32	0.04	0.1	9.2		0.08	0.07	0.33	94.86
EP	ilm		a		49.42	0.26	45.19	0.13	4.7		0.02			0.02	0.04		99.78
EP	mt		a		12.66	0.27	79.24	0.05	0.29		0.01	0.01		0.05	0.03		92.61
EP	mt	core	b		0.39	0.53	88.81	0.01	0.07	0.03	0.06	0.01	0.22	0.48			90.61
EP	mt	rim	b		0.05	0.39	91.06	0.04	0.07	0.06	0.03		0.16	0.51	0.1		92.47
San Jose Pluton
SJ	plag	rim	a	59.94	0.02	25.14		0.01		6.69	7.73	0.09					99.62	67.3	32.2	0.5
SJ	plag	core	a	59.58	0.02	25.48			0.01	6.99	7.48	0.1					99.66	65.6	33.9	0.6
SJ	plag	rim	a	60.64	0.04	24.92				6.21	7.97	0.09					99.87	69.6	30	0.5
SJ	plag	core	b	59.22	0.04	25.58				8.75	7.01	0.08					100.68	58.9	40.7	0.4
SJ	amp	rim	a	47.57	0.75	7.9	13.83	13.41	0.42	11.72	1.09	0.29		0.06	0.02		97.06
SJ	amp	mid	a	48.52	1.16	7.66	14.14	13.53	0.41	11.75	1.01	0.25	0.01	0.03			98.47
SJ	amp	core	a	48.69	0.83	7.67	13.35	13.9	0.43	11.58	1.02	0.35	0.03	0.05			97.9
SJ	amp	core	a	48.74	0.84	7.6	13.32	14.28	0.47	11.17	1.04	0.24	0.02	0.03			97.75
SJ	amp	mid	a	49.2	0.66	7.19	13.39	14.16	0.54	11.18	1.09	0.23		0.06			97.7
SJ	amp	rim	a	47.98	0.47	8.71	14.16	13.18	0.4	11.65	1.1	0.27		0.06	0.02		98
SJ	amp	core	b	50.94	1.36	5.7	12.15	16.09	0.56	10.58	0.84	0.18		0.05			98.45
SJ	amp	core	b	50.74	1.38	5.84	11.27	15.67	0.37	11.44	0.98	0.15		0.04	0.03		97.91
SJ	amp	core	b	51.14	1.21	5.88	11.57	15.93	0.29	11.27	0.82	0.17			0.05		98.33
SJ	amp	core	b	49.72	0.85	6.95	12.87	14.61	0.49	11.31	1.09	0.25		0.03	0.03		98.2
SJ	amp	rim	b	49.27	1.02	7.36	13.24	14.29	0.55	10.8	1.13	0.22		0.02			97.9
SJ	bte	rim	a	37.65	2.01	15.71	16.47	12.73	0.22	0.04	0.17	9.32		0.07			94.39
SJ	bte	core	a	37.39	2	15.84	17.12	12.61	0.2	0.07	0.13	9.22		0.06			94.64
SJ	bte	rim	a	37.54	1.82	16.15	17.2	13.07	0.2	0.21	0.1	8.75	0.03	0.04	0.03		95.14
SJ	bte	core	b	37.05	1.92	16	16.84	12.78	0.24	0.05	0.17	8.95		0.07			94.07
SJ	chl			27.25	0.28	20.78	18.47	19.13	0.35	0.07	0.06	0.85	0.04	0.07		0.06	87.41
SJ	sph			28.62	38.59	1.27	0.62	0.01	0.05	27.76	0.04	0.01		0.06	0.02		97.05
SJ	mt		a	0.01	11.38	0.1	80.5	0.02	0.17	0.01		0.01		0.39			92.59
SJ	mt		a		10.89	0.06	80.41	0.02	0.07	0.01	0.01		0.01	0.41	0.03		91.92
SJ	mt		b		11.09	0.1	80.24	0.01	0.03	0.01	0.05	0.01	0.01	0.38	0.05		91.98
SJ	mt		b	0.02	16.49	0.21	74.64	0.01	0.04	0.08	0.07	0.01	0.01	0.38			91.96
SJ	ilmenite		a	0.24	51.33	0.09	45.49	0.16	2.5	0.09	0.03					0.01	99.94
SJ	ilmenite		a	0.01	49.95	0.08	47.51	0.21	2.47	0.06	0.04	0.03			0.02		100.38
Valle Pedregosa Pluton
VP-4	plag	rim	a	62.52	0.01	24.38		0.01		5.59	8.15	0.11					100.77	72	27.3	0.6
VP-4	plag	mid	a	59.96		25.55		0.01		7.44	7	0.13					100.09	62.5	36.7	0.8
VP-4	plag	mid	a	59.51	0.02	25.76				7.68	7.12	0.12					100.21	62.3	37.08	0.7
VP-4	plag	core	a	55.59		27.23				105	5.68	0.11					193.61	49.2	50.2	0.6
VP-4	plag	mid	b	59.91	0.02	24.39				6.74	7.87	0.1					99.03	67.5	32	0.5
VP-4	amp	core	a	47.7	0.76	7.53	18.02	10.59	0.5	11.51	0.75	0.3		0.05			97.71
VP-4	amp	rim	a	47.23	0.81	7.19	18.98	10.19	0.69	10.82	0.84	0.36		0.04			97.15
VP-4	bte	rim	a	36.18	3.46	16.07	20.6	9.05	0.21	0.01	0.14	8.95		0.06			94.73
VP-4	bte	core	a	36.3	3.95	15.6	21.23	9.28	0.22	0.03	0.2	8.74	0.06	0.04	0.04	0.06	95.75
VP-4	bte	core	a	35.85	3.61	16.13	20.43	8.99	0.19	0.02	0.09	8.8		0.04	0.02	0.22	94.39
VP-4	bte	rim	a	36.15	3.78	15.42	21.31	9.37	0.19		0.12	8.93		0.06			95.33
VP-4	bte	rim	b	36.69	3.61	17.81	19.7	8.46	0.17	0.04	0.15	8.02		0.03	0.04		94.72
VP-4	bte	core	b	36.37	3.72	15.61	21.16	9.26	0.22	0.03	0.14	8.94	0.05	0.06			95.56
VP-4	bte	rim	b	36.12	3.77	15.21	21.14	9.21	0.29	0.04	0.11	8.99		0.07			94.95
VP-4	bte	mid	c	35.68	3.32	15.23	20.97	9.62	0.21	0.02	0.13	9.26		0.05			94.49
VP-4	bte	mid	c	35.62	3.28	14.87	20.62	9.17	0.3	0.01	0.11	9.36		0.05			93.39
VP-4	bte	mid	c	36	2.58	17.33	19.6	8.98	0.23	0.02	0.07	8.57		0.04			93.42
VP-8	plag	rim	a	69.55		18.79				1.74	9.63	0.07					99.78	90.57	9.02	0.41
VP-8	plag	mid	a	58.54		26.09				8.23	7.23	0.08					100.17	61.13	38.42	0.44
VP-8	plag	mid	a	58.53		26.26				8.2	7.34	0.06					100.39	61.61	38.04	0.34
VP-8	plag	mid	a	57.17		27.02				9.2	6.83	0.07					100.29	57.1	42.49	0.41
VP-8	plag	core	a	54.73		28.31				11.04	5.7	0.08					99.86	48.08	51.46	0.46
VP-8	plag	mid	b	59.2		25.51				7.37	7.87	0.1					100.05	65.52	33.91	0.57
VP-8	plag	rim	c	59.11		25.79				7.16	8.27	0.09					100.42	67.28	32.22	0.5
VP-8	plag	mid	c	59.11		25.21				6.9	7.77	0.19					99.18	66.39	32.55	1.06
VP-8	plag	core	c	57.17		27.26				9.06	6.66	0.1					100.25	56.79	42.67	0.54
VP-8	plag	rim	c	64.06		22.43				3.31	9.94	0.16					99.9	83.69	15.42	0.89
VP-8	plag	rim	d	58.98		25.93				7.85	7.35	0.07					100.18	62.64	36.95	0.41
VP-8	plag	core	d	54.52		28.4				10.83	5.99	0.1					99.84	49.73	49.75	0.52
VP-8	plag	core	e	54.61		28.44				10.61	5.98	0.09					99.73	50.25	49.26	0.48
VP-8	plag	mid	e	56.54		27.3				9.39	6.53	0.14					99.9	55.32	43.91	0.77
VP-8	plag	mid	e	59.7		25.25				6.95	7.93	0.1					99.93	67.02	32.45	0.54
VP-8	amp	rim	a	47.45	0.87	7.33	16.75	12.32	0.57	11.8	1.11	0.43		0.03			98.66
VP-8	amp	core	a	47.58	0.83	7.78	16.39	12.33	0.51	11.97	1.21	0.52		0.05			99.17
VP-8	amp	core	a	46.91	0.74	7.32	16.32	11.94	0.6	11.88	1.1	0.5		0.03			97.34
VP-8	amp	rim	a	46.51	0.81	8.18	16.87	11.56	0.51	11.86	1.24	0.55	0.02	0.03			98.14
VP-8	amp	rim	a	47.27	0.53	7.54	16.45	11.9	0.41	12.17	0.98	0.42		0.05			97.72
VP-8	amp	core	a	47.75	0.89	7.1	16.65	12.44	0.49	11.61	1.23	0.49	0.07	0.04			98.76
VP-8	bte	rim	a	37.44	3.26	14.88	18.59	10.62	0.22	0.01	0.11	9.45		0.07		0.04	94.69
VP-8	bte	mid	a	37.15	3.53	14.03	18.73	10.87	0.22		0.12	9.36	0.05	0.09	0.06	0.04	94.25
VP-8	bte	core	a	37.35	3.92	14.96	18.66	11.21	0.28		0.16	9.37	0.01	0.06	0.01	0.05	96.04
VP-8	chl		a	26.55	0.08	20.57	20.99	17.63	0.35	0.05	0.12	0.03	0.01	0.03		0.04	86.45
VP-8	chl		b	27.06		19.39	23.27	17.44	0.37	0.03	0.07	0.03		0.06	0.03	0.05	87.8
VP-8	chl		c	26.77	0.09	20.33	20.59	18.43	0.39	0.01	0.03	0.03		0.05		0.06	86.78
VP-8	chl		d	27.34	0.03	20.16	21.62	19	0.33	0.04	0.05	0.07		0.03		0.04	88.71
VP-8	mu		a	48.95	0.16	27.18	5.78	2.67			0.16	10.4		0.01	0.01	0.03	95.35
VP-8	mu		b	49.13		29.3	2.64	2.91		0.02	0.14	10.49			0.02	0.04	94.69
VP-8	mt		a		0.02	0.1	91.36	0.03	0.16				0.08	0.39			92.14
VP-8	mt		b		0.03	0.08	91.86	0.01	0.16				0.14	0.39			92.67
VP-8	mt		c			0.09	91.7	0.02	0.17	0.07			0.19	0.38	0.07		92.69
VP-8	mt		d		0.01	0.12	91.97	0.01	0.16				0.11	0.39			92.77
VP-9	plag	rim	a	61.47	0.03	24.5				6.9	7.2	0.12					100.22	64.9	34.4	0.7
VP-9	plag	rim	a	59.54	0.02	25.16				7.38	7.49	0.11					99.7	64.3	35	0.6
VP-9	plag	rim	b	59.78	0.04	24.99				7.47	7.48	0.08					99.84	64.2	35.4	0.5
VP-9	plag	core	b	58.9	0.14	25.17		0.01		7.82	6.98	0.07					99.09	61.5	38.1	0.4
VP-9	plag	core	c	53.97		28.72				11.07	5.41	0.06					99.23	46.7	52.9	0.4
VP-9	plag	rim	c	57.66	0.02	26.49				8.79	0.5	0.13					1165.88	56.8	42.4	0.8
VP-9	amp	rim	a	48.29	0.86	7.82	15.88	12.54	0.54	11.15	1.17	0.3		0.04			98.59
VP-9	amp	core	a	47.18	1.33	7.84	16.11	12.52	0.6	10.83	1.15	0.22		0.04			97.82
VP-9	amp	core	a	47.57	0.84	7.1	15.54	13.05	0.59	11.05	1.04	0.27	0.04	0.07			97.16
VP-9	amp	rim	a	46.87	0.9	7.5	15.51	12.79	0.51	11.12	1.04	0.39		0.04	0.03		96.7
VP-9	bte	rim	a	36.89	3.19	15.39	18.09	11.26	0.26		0.11	9.66					94.85
VP-9	bte	core	a	36.71	3.46	14.77	17.53	12.22	0.24		0.13	9.46	0.05		0.05		94.62
VP-9	bte	core	a	36.05	3.69	14.75	17.92	12.09	0.17	0.02	0.21	9.03		0.06	0.03		94.02
VP-9	bte	rim	a	36.35	3.28	15.53	17.8	11.49	0.15	0.07	0.1	9.29	0.04	0.04			94.14
VP-9	chl			26.17	0.11	20.39	21.75	17.36	0.36	0.02	0.04	0.01		0.07		0.02	86.3
VP-9	mt	rim	a	0.03	0.5	0.09	89.06	0.03	0.07	0.03	0.02	0.03	0.14	0.41	0.07		90.48
VP-9	mt	core	b	0.06	0.19	0.09	88.07	0.04	0.04	0.05	0.04	0.01	0.14	0.5	0.03		89.26
VP-9	mt	rim	b	0.03	0.13	0.15	88.18	0.03	0.08	0.04	0.03		0.06	0.47	0.04		89.24
VP-9	ilm	mid	a		49.47	0.07	46.59	0.1	3.31		0.07				0.02	0.07	99.7
VP-9	ilm	rim	b	0.18	49.62	0.06	46.3	0.11	3.36	0.04					0.05		99.72
VP-9	ilm	core	b	0.05	50.6	0.05	45.73	0.1	3.32	0.03	0.04	0.01					99.93
VP-9	ilm	rim	b	0.02	50.17	0.43	45.22	0.1	3.42	0.06	0.05						99.47
Los Encinos Pluton
LE-1	plag	rim	a	60.68		24.69				6.85	7.73	0.04					99.99	67	32.8	0.2
LE-1	plag	core	a	56.81		27.42		0.01		9.91	6.11	0.04					100.3	52.6	47.2	0.2
LE-1	plag	mid	a	57.33		26.86			0.01	9.39	6.2	0.09					99.88	54.1	45.3	0.5
LE-1	plag	mid	a	56.73		26.99	0.02			9.19	6.3	0.07					99.3	55.1	44.5	0.4
LE-1	plag	mid	b	56.47	0.02	27.28				9.82	5.94	0.04					99.57	52.2	47.6	0.2
LE-1	plag	core	b	56.4	0.02	27.54		0.01		9.96	5.83	0.07					99.83	51.3	48.3	0.4
LE-1	plag	rim	b	58.29	0.01	26.85				8.86	6.47	0.08					100.56	56.7	42.9	0.4
LE-1	plag	rim	c	61.35	0.03	24.05				5.84	8	0.05					99.32	71.1	28.7	0.3
LE-1	plag	core	c	63.17		23.26				4.71	8.61	0.13					99.88	76.2	23	0.7
LE-1	plag	rim	c	61.84		24.15				6.02	8.16	0.08					100.25	70.7	28.8	0.4
LE-1	amp	rim	a	48.53	0.83	6.9	15.89	13.13	0.53	10.38	0.87	0.24	0.03	0.05			97.38
LE-1	amp	core	a	48.1	0.8	7.37	16.53	12.81	0.57	10.34	0.98	0.22		0.04			97.76
LE-1	amp	rim	a	49.1	0.64	6.84	15.05	13.14	0.45	11.02	0.81	0.18	0.05	0.04			97.32
LE-1	amp	rim	b	51.54	0.46	4.64	17.44	14.99	0.65	7.58	0.64	0.11		0.04			98.09
LE-1	amp	core	b	50.97	0.53	5.26	17.22	14.53	0.65	8.27	0.55	0.13		0.05			98.16
LE-1	amp	rim	c	49.34	0.61	6.42	16.46	13.55	0.39	10.05	0.76	0.17	0.01	0.06			97.82
LE-1	amp	core	c	49.73	0.59	5.66	17.77	14.14	0.64	8.57	0.73	0.16	0.06				98.05
LE-1	amp	core	c	48.19	0.72	7.57	15.16	12.96	0.38	11.25	0.98	0.19		0.06	0.02		97.48
LE-1	amp	rim	c	53.39	0.08	0.79	22.94	17.39	1.23	0.98	0.08	0.01					96.89
LE-1	amp	rim	d	49.51	0.62	6.96	15.18	13.09	0.43	11.05	0.93	0.18		0.02			97.97
LE-1	amp	core	d	49.25	0.68	7.13	15.92	13.15	0.48	10.67	1.01	0.19		0.05	0.02		98.55
LE-1	amp	rim	d	48.99	0.68	7.13	16.02	13.03	0.53	10.51	0.87	0.18	0.05	0.07			98.06
LE-1	amp			53.16	1.34	0.73	23.2	16.89	1.45	1.14	0.08	0			0.02		98.01
LE-1	bte	rim	a	36.86	3.21	14.67	17.63	12.96	0.17	0.04	0.25	8.6		0.06			94.45
LE-1	bte	mid	a	36.99	2.96	14.8	17.34	12.72	0.09	0.04	0.23	8.67	0.02	0.04	0.04		93.94
LE-1	bte	core	a	36.84	2.99	14.67	17.7	12.73	0.12	0.05	0.16	8.46		0.03			93.75
LE-1	bte	core	b	37.35	3.27	14.96	17.7	12.55	0.1	0.06	0.22	8.6		0.04		0.03	94.88
LE-1	bte	rim	c	37.07	3.2	15.07	17.76	12.34	0.16	0.09	0.14	8.59		0.04			94.46
LE-1	ilm	core	a	0.01	52.42	0.11	42.15	0.05	4.77	0.15	0.02	0.01					99.69
LE-1	ilm	rim	a	0.07	46.53	0.06	48.28	0.03	3.79	0.15	0.02						98.93
LE-1	ilm	rim	b	0.07	48.8	0.16	49.29	0.22	1.3	0.01	0.04		0.04		0.07		100
LE-1	ilm	core	b	0.03	48.53	0.07	49.35	0.19	1.32		0.07	0.01	0.04		0.02	0.06	99.69
LE-1	ilm	rim	b	0.1	48.99	0.05	48.7	0.2	1.23		0.03		0.02		0.05		99.37
LE-2	plag	mid	a	59.37	0.03	25.7		0.01		7.77	7.72	0.09		0.01			100.7	64	35.6	0.5
LE-2	plag	rim	b	61.04	0.01	24.88			0.01	6.55	8.2	0.08		0.01			100.78	69.1	30.5	0.5
LE-2	plag	mid	b	61.42	0.02	24.54				6.2	8.19	0.22					100.59	69.7	29.2	1.2
LE-2	plag	core	b	55.88	0.03	27.98				10.18	5.9	0.1					100.07	50.9	48.6	0.6
LE-2	plag	mid	b	59.77	0.01	25.51				7.4	7.33	0.15					100.17	63.6	35.5	0.9
LE-2	plag	rim	c	61.2		24.87				6.54	8.16	0.09					100.86	69	30.5	0.5
LE-2	plag	mid	c	61.04		24.8				6.43	8.11	0.11					100.49	69.1	30.3	0.6
LE-2	plag	core	c	57.23	0.02	27.12				9.99	5.98	0.05					100.39	51.8	47.9	0.3
LE-2	plag	rim	c	61.76	0.02	24.64				5.85	8.54	0.09					100.9	72.2	27.3	0.5
LE-2	amp	rim	a	48.68	0.66	6.36	16.33	11.98	0.51	11.07	0.92	0.24		0.04			96.79
LE-2	amp	core	a	45.91	1.26	8.32	17.05	11.32	0.51	11.17	1.2	0.28	0.03	0.02			97.07
LE-2	amp	rim	a	47.55	0.82	6.78	16.48	12.49	0.58	10.54	1.01	0.24	0.03	0.06			96.58
LE-2	amp	rim	b	48.47	0.65	6.28	16.25	12.27	0.56	10.97	0.89	0.21	0.01	0.03			96.59
LE-2	amp	core	b	46.73	1.01	7.76	16.48	11.76	0.44	11.13	1.17	0.27		0.05	0.06		96.86
LE-2	amp	rim	b	48.67	0.79	6.08	16.85	13.53	0.59	9.66	0.89	0.21			0.03		97.3
LE-2	amp	rim	c	47.24	0.85	7.26	16.56	12.18	0.51	10.9	1.01	0.22		0.05	0.03		96.81
LE-2	bte	rim	a	37.04	3.46	15.26	17.87	11.41	0.13	0.11	0.1	8.26					93.64
LE-2	bte	rim	b	36.12	3.5	15.88	18.39	11.32	0.19	0.09	0.11	.8.61	0.02	0.08			85.7
LE-2	bte	rim	c	36.52	2.8	15.4	18.72	10.99	0.19	0.12	0.08	9.05	0.02	0.04	0.03		93.96
LE-2	bte	core	c	36.49	2.88	15.23	19.13	11.27	0.16	0.04	0.09	8.96					94.25
LE-2	bte	rim	c	36.02	3.16	14.94	18.97	11.29	0.1	0.04	0.11	8.91		0.04	0.07	0.52	94.17
LE-3	plag	rim	a	62.94		22.79				4.11	9.89	0.12					99.85	80.81	18.57	0.62
LE-3	plag	core	a	59.31		24.66				6.71	8.39	0.18					99.25	68.69	30.36	0.95
LE-3	plag	mid	b	60.41		24.26				5.97	8.71	0.13					99.48	72.04	27.27	0.69
LE-3	plag	mid	c	60.93		23.2				6.52	8.44	0.17					99.26	69.47	29.64	0.89
LE-3	plag	rim	d	61.2		24.2				6.04	8.47	0.22					100.13	70.84	27.92	1.23
LE-3	plag	core	d	60.62		24.13				5.9	8.61	0.27					99.53	71.47	27.08	1.46
LE-3	plag	core	e	59.74		24.85				6.18	8.55	0.22					99.54	70.59	28.2	1.21
LE-3	plag	rim	e	60.15		24.87				6.21	8.71	0.14					100.08	71.18	28.06	0.76
LE-3	plag	rim	f	60.48		24.57				6.25	8.54	0.1					99.94	70.82	28.64	0.54
LE-3	plag	core	f	60.71		24.47				6.2	8.62	0.14					100.14	71	28.25	0.75
LE-3	plag	core	g	60.87		24.6				6.06	8.69	0.13					100.35	71.62	27.65	0.73
LE-3	plag	mid	g	60.65		24.35				6.15	8.51	0.27					99.93	70.39	28.12	1.49
LE-3	plag	rim	g	60.57		24.61				6.42	8.36	0.26					100.22	69.19	29.37	1.43
LE-3	bte	rim	a	35.32	2.62	18.13	19.87	9.66	0.33	0.14	0.15	9.51	0.01	0.06	0.02	0.08	95.9
LE-3	bte	core	a	35.29	2.6	17.38	19.57	9.91	0.36	0.04	0.15	9.48		0.04	0.03	0.03	94.88
LE-3	bte	rim	a	35.79	2.71	17.84	19.94	9.82	0.36	0.01	0.2	9.32		0.03		0.03	96.05
LE-3	bte	rim	b	35.92	2.74	18.44	20.25	9.54	0.26	0.01	0.19	9.47	0.06	0.03		0.03	96.94
LE-3	bte	core	b	35.42	2.79	17.27	19.74	9.69	0.36	0.02	0.23	9.35	0.03	0.03		0.04	94.97
LE-3	bte	rim	b	35.5	2.77	17.42	19.4	9.35	0.37	0.05	0.2	9.16		0.05			94.27
LE-3	bte	rim	c	36.23	2.72	18.02	19.49	9.73	0.29	0.08	0.15	9.1	0.01				95.82
LE-3	bte	core	c	35.87	2.78	17.83	19.94	9.69	0.28	0.04	0.17	9.38		0.03			96.01
LE-3	bte	rim	c	35.61	2.85	17.66	20.12	9.98	0.28		0.18	9.44	0.01			0.05	96.18
LE-3	bte	rim	d	35.94	2.5	18.22	18.97	9.35	0.27	0.03	0.15	9.52		0.03			94.98
LE-3	bte	core	d	36.01	2.59	17.97	19.66	9.32	0.37	0.04	0.15	9.5		0.05		0.03	95.69
LE-3	bte	rim	d	35.75	2.71	18.37	19.37	9.29	0.34	0.03	0.15	9.5	0.06	0.05		0.02	95.64
LE-3	mu			46.8	0.51	31.61	2.37	1.8	0.05	0.03	0.28	10.16				0.02	93.63
Western Peninsular Ranges
Woodson	plag	rim	a	65.87	0.01	21.66	0.03			2.43	10.72	0.17					100.89	88.04	11.04	0.92
Woodson	plag	mid	b	64.48	0.02	22.04	0.01	0.01	0.01	3.78	9.88	0.18					100.41	81.74	17.28	0.99
Woodson	plag	core	c	57.05	0.03	26.61		0.01	0.01	8.84	6.42	0.07					99.04	56.55	43.03	0.42
Woodson	plag	mid	d	62.73		23.68		0.01		4.94	8.8	0.17					100.33	75.63	23.43	0.95
Woodson	plag	mid	e	62.5		23.51				4.75	9.27	0.14					100.17	77.36	21.89	0.75
Woodson	bte	rim	a	36.25	2.77	14.08	25.1	7.73	0.68	0.03	0.06	9.04					95.74
Woodson	bte	rim	b	35.79	2.81	13.32	25.77	8.09	0.79	0.06	0.06	9.2					95.89
Woodson	bte	rim	c	35.6	2.84	14.1	25.08	7.52	0.75	0.04	0.04	9.41					95.38
Woodson	bte	core	d	35.82	2.87	13.95	25.02	7.82	0.8	0.03	0.05	9.27					95.63
Woodson	bte	core	e	36.28	2.73	14.03	25.09	7.64	0.62	0.06	0.09	9.23		0.03	0.04		95.84
Woodson	sph		a	31.56	38.26	1.43	1.18	0.04	0.09	28.09	0.01	0.02		0.13			100.81
Woodson	sph		b	31.02	37.96	1.82	1.18	0.03	0.12	28.16	0.01	0.1		0.3	0.01		100.71
Woodson	sph		c	31.17	37.39	1.45	1.52	0.02	0.11	27.25	0.03	0.07		0.61	0.02		99.64
Woodson	sph		d	31.24	37.54	1.43	1.04	0.03	0.16	27.64		0.12		0.59			99.79
Woodson	sph		e	30.81	37.02	1.39	1.64	0.03	0.18	27.11	0.03	0.11		0.79	0.01		99.12
Woodson	mt		a	0.04	0.13	0.11	90.79	0.01	0.14	0.02			0.06	0.14			91.44
Woodson	mt		b	0.04	0.19	0.12	90.9	0.02	0.16	0.08			0.04	0.17			91.72
Woodson	mt		c	0.04	0.3	0.27	90.19	0.02	0.17	0.11	0.03	0.01		0.16			91.3
Woodson	mt		d	0.06	0.17	0.21	90.62	0.03	0.14	0.13	0.05	0.01	0.03	0.19			91.64
Victoria	plag	rim	a	57.28	0.05	27.11				8.6	6.08	0.21					99.33	55.4	43.3	1.2
Victoria	plag	mid	a	57.11	0.04	27.26		0.01		9.06	5.92	0.22					99.62	53.5	45.2	1.3
Victoria	plag	mid	a	56.48	0.04	27.66	0.07	0.01		9.92	5.46	0.17					99.81	49.4	49.6	1
Victoria	plag	mid	a	56.79	0.05	27.45				9.61	5.53	0.17					99.6	50.5	48.5	1
Victoria	plag	rim	a	58.11		26.85	0.04	0.01		8.78	6.24	0.19					100.22	55.6	43.2	1.1
Victoria	plag	amp inclu	b	58.73		26.22				8.41	6.23	0.16					99.75	56.7	42.3	0.9
Victoria	plag	amp inclu	b	57.95	0.02	27.31				8.57	6.09	0.21					100.15	55.5	43.2	1.3
Victoria	plag	mid	c	58.99	0.02	26.27				7.91	6.62	0.18					99.99	59.6	39.4	1.1
Victoria	plag	mid	d	59.17	0.01	25.89				8.05	6.23	0.24					99.59	57.5	41.1	1.4
Victoria	amp	rim	a	45.72	1.29	8.8	17.04	10.66	0.5	11.73	0.97	0.85			0.08		97.64
Victoria	amp	mid	a	45.45	1.57	8.37	18.16	10.72	0.39	11.93	1.13	0.89		0.07			98.68
Victoria	amp	core	a	45.48	1.66	8.5	18.05	10.73	0.5	11.26	1.33	0.81		0.04	0.02		98.38
Victoria	amp	rim	a	45.7	1.25	8.51	17.93	10.49	0.35	11.37	1.02	0.86	0.01	0.03			97.52
Victoria	amp	rim	b	46.18	1.19	8.33	16.31	11.24	0.35	11.93	0.92		0.8		0.02		97.27
Victoria	amp	mid	b	45.15	1.87	8.78	18.31	10.46	0.45	10.51	1.32	0.87	0.03	0.06	0.01		97.82
Victoria	amp	core	b	45.1	1.99	8.76	18.64	10.73	0.34	10.89	1.35	0.98		0.12			98.9
Victoria	amp	plag incl	c	44.67	0.91	8.65	20.22	9.22	0.38	11.93	0.79	0.72	0.04		0.01		97.54
Victoria	amp	plag incl	c	43.94	0.91	9.22	21.13	8.55	0.33	11.24	0.88	0.99		0.05			97.24
Victoria	sph		a	30.54	38.08	0.96	0.8		0.08	28.2	0.03	0.03	0.07	0.24			99.03
Victoria	sph		a	30.9	37.22	1.21	0.97	0.01	0.1	28.08				0.26			98.75
Victoria	ilm			0.02	42.63	0.04	51.07	0.65	1.28	0.16	0.01	0.03	0.1	0.21			96.2
Alpine Hts	plag	rim	a	58.39	0.01	26.09	0.01	0.01	0.01	9.13	6.56	0.35					100.56	55.43	42.62	1.95
Alpine Hts	plag	mid	a	57.51	0.01	26.95	0.02		..	8.87	6.26	0.35					99.97	54.99	43.01	2
Alpine Hts	plag	mid	a	56.5	0.02	27.18	0.02	0.01	0.01	10.63	5.57	0.29					100.23	47.86	50.51	1.63
Alpine Hts	plag	mid	a	56.82		27.24	0.01		0.01	9.59	6.12	0.27					100.06	52.75	45.72	1.53
Alpine Hts	plag	mid	a	54.73		28.63	0.01			11.82	4.87	0.25					100.31	42.14	56.46	1.4
Alpine Hts	plag	mid	a	54.13		29.13				11.66	4.74	0.2					99.86	41.91	56.95	1.14
Alpine Hts	plag	core	a	52.41		30.16	0.01			12.69	4.38	0.19					99.84	60.84	36.69	2.48
Alpine Hts	plag	rim	b	59.38		25.93	0.01			7.65	7.01	0.43					100.41	60.84	36.69	2.48
Alpine Hts	plag	mid	b	57.35		27.21	0.01			8.68	6.38	0.34					99.97	55.99	42.05	1.96
Alpine Hts	plag	mid	b	54.35		29.09	0.01			10.89	5.45	0.27					100.06	46.83	51.67	1.5
Alpine Hts	plag	core	b	54.08		28.66				11.92	5	0.17					99.83	42.73	56.33	0.94
Alpine Hts	px		a	51.78	0.25	0.69	27.01	16.62	1.02	2.33	0.02						99.72
Alpine Hts	px		b	52.08	0.2	0.6	27.25	16.62	0.89	2.1	0.05						99.79
Alpine Hts	px		c	51.69	0.23	0.58	28.49	17.05	0.85	0.75					0.05		99.69
Alpine Hts	px		d	51.82	0.17	0.58	28.45	16.87	0.99	0.78	0.01		0.02		0.05		99.74
Alpine Hts	px		e	51.86	0.19	0.64	28.39	16.73	0.85	0.98					0.03		99.67
Alpine Hts	px		f	52.07	0.24	0.72	26.55	16.58	0.93	3.1	0.01	0.01					100.21
Alpine Hts	px		a	51.35	0.14	0.47	29.43	16.19	1.18	0.86		0.01		0.03			99.66
Alpine Hts	px		b	51.65	0.12	0.53	29.17	16.08	1.19	0.85							99.59
Alpine Hts	px		a	53.09	0.15	0.86	11.17	11.8	0.45	22.14	0.34						100
Alpine Hts	px		b	52.65	0.14	0.95	12.38	11.86	0.51	20.9	0.29						99.68
Alpine Hts	px		c	52.66	0.14	1.02	11.84	11.95	0.42	21.48	0.27						99.78
Alpine Hts	px		d	52.9	0.12	1.06	11.79	12.02	0.46	21.53	0.32						100.2
Alpine Hts	px		e	53.17	0.12	1.03	11.75	11.89	0.49	21.32	0.35						100.12
Alpine Hts	bte		a	36.81	5.05	13.28	19.78	10.82	0.09	0.09	0.06	9.24		0.19			95.41
Alpine Hts	bte		b	36.79	4.85	13.65	19.57	10.73	0.12	0.11	0.07	8.99		0.19	0.04		95.11
Alpine Hts	bte		c	36.86	6.14	14.02	20.13	9.73	0.16	0.05	0.06	9.08		0.31			96.54
Alpine Hts	bte		d	36.77	5.19	13.88	19.14	10.66	0.16	0.03	0.06	9.25		0.22			95.36
Alpine Hts	bte		e	36.82	4.97	13.68	19.61	10.7	0.15	0.04	0.05	9.27		0.22			95.51
Alpine Hts	bte		f	36.81	4.92	13.62	19.57	10.7	0.13	0.03	0.09	9.29		0.21			95.37
Alpine Hts	bte		g	36.75	5.09	13.57	19.52	10.79	0.15	0.03	0.06	9.36		0.18			95.5
Alpine Hts	bte		h	36.92	5.09	13.64	19.52	10.67	0.13	0.06	0.07	9.15	0.01	0.16			95.42
Alpine Hts	bte		i	36.87	4.79	13.63	20.1	10.72	0.11	0.12	0.1	8.99		0.16			95.59
Alpine Hts	bte		j	36.66	4.75	13.93	19.9	10.75	0.13	0.13	0.09	8.95		0.19			95.48
Alpine Hts	mt		a	0.04	1.28	0.24	88.29	0.04	0.14	0.03	0.01	0.01	0.57	0.62			91.27
Alpine Hts	mt		b	0.05	0.98	0.87	88.8	0.04	0.03	0.02	0.04	0.01	0.5	0.64			91.98
Alpine Hts	mt		c	0.04	0.89	0.31	88.85	0.02	0.02	0.02		0.03	0.43	0.57	0.03	0.01	91.22
Alpine Hts	ilm		a	0.04	49.89	0.18	45.28	0.28	2.34	0.04		0.05			0.94	0.01	99.05
Alpine Hts	ilm		b	0.03	50.69	0.09	44.66	0.27	2.39	0.04					1.14		99.31
Sierra Nevada - Tuolomne transect
8-4-5	plag	rim	a	56.31		27.48				9.81	6.17	0.08					99.85	52.99	46.54	0.47
8-4-5	plag	core	a	54.54		28.24				11.29	5.57	0.11					99.75	46.9	52.52	0.58
8-4-5	plag	rim	a	56.84		26.9				9.49	6.5	0.15					99.88	54.89	44.3	0.82
8-4-5	plag	rim	b	55.7		27.29				10.22	5.99	0.16					99.36	51.02	48.08	0.89
8-4-5	plag	mid	b	55.9		27.18				10.47	6.06	0.14					99.75	50.78	48.44	0.78
8-4-5	plag	core	b	50.36		31.04				15.38	3.08	0.06					99.92	26.48	73.17	0.35
8-4-5	plag	rim	c	53.42		29.18				12.22	4.9	0.11					99.83	141.8	57.61	0.59
8-4-5	plag	mid	c	50.9		30.76				13.9	4.15	0.07					99.78	34.92	64.7	0.37
8-4-5	plag	core	c	45.76		34.2				18.11	1.72	0.06					99.85	14.64	85.01	0.35
8-4-5	amp	core	a	45.93	0.64	7.59	17.94	10.57	0.55	12.25	0.83	0.71	0.05	0.03	0.03		97.12
8-4-5	amp	rim	a	47.08	0.5	7	17.55	11.03	0.52	12.04	0.75	0.6	0.04	0.03			97.14
8-4-5	amp	rim	b	45.16	0.81	7.58	18.12	10.64	0.51	11.95	0.92	0.75		0.01	0.7		97.15
8-4-5	amp	mid	b	44.93	1.08	8.54	18.6	9.63	0.59	12.13	0.96	0.83	0.07	0.1	0.03		97.49
8-4-5	amp	core	b	45.12	1.11	8.29	18.58	9.9	0.45	12.03	0.9	0.77	0.07	0.1	0.02		97.34
8-4-5	amp	core	c	47.4	0.75	7.23	17.95	10.9	0.58	12.29	0.86	0.63	0.02	0.04			98.65
8-4-5	amp	rim	c	44.91	1.07	8.88	19.11	9.82	0.51	11.95	1.04	0.85	0.08	0.04			98.26
8-4-5	amp	rim	d	47.89	0.65	7.22	17.69	10.74	0.51	12.26	0.79	0.61		0.05			98.41
8-4-5	amp	core	d	46.55	1.12	7.75	17.95	10.33	0.62	12.26	0.88	0.74	0.08	0.11	0.03		98.42
8-4-5	amp	rim	d	47.12	0.77	7.66	18.73	10.34	0.44	12.17	0.92	0.74	0.13	0.09			99.11
8-4-5	bte	rim		36.28	3.09	15.04	22.03	10.25	0.31	0.01	0.15	9.36		0.06	0.04		96.62
8-4-5	bte	mid		35.9	3.11	14.83	21.41	9.94	0.28		0.13	9.22	0.07	0.06	0.02	0.02	94.99
8-4-5	bte	core		36.44	3.24	14.62	21.24	10	0.31		0.11	9.25	0.07	0.05	0.02	0.02	95.37
8-4-5	bte	rim		36.59	3.21	14.44	22	10.2	0.29	0.01	0.14	9.43	0.04	0.04			96.39
8-4-5	bte	mid		36.47	3.26	14.64	21.62	10.14	0.25	0.01	0.16	9.33	0.02	0.05		0.03	95.98
8-4-5	bte	core		36.33	1.76	14.98	20.78	10.53	0.28	0.14	0.14	9.1	0.09	0.03	0.03	0.02	94.21
8-4-5	bte	rim		36.26	3.16	14.77	21.32	10.16	0.33	0.02	0.1	9.52	0.047	0.03		0.04	95.757
8-4-5	bte	mid		36.21	3.17	14.11	21.77	10.25	0.35	0.01	0.16	9.25	0.02	0.05	0.03		95.38
8-4-5	bte	core		36.03	3.14	14.03	21.74	10.2	0.36	0.01	0.12	9.31	0.05	0.05	0.04		95.08
8-4-5	bte	core		36.38	3.05	14.23	21.44	10.19	0.29	0.02	0.14	9.62	0.05	0.06	0.04	0.03	95.54
8-4-5	bte	rim		36.29	3.05	14.61	21.16	10.01	0.31	0.006	0.1	9.37	0.06	0.04		0.04	95.046
8-4-5	bte	rim		36.32	3	14.15	21.96	10.16	0.33	0.06	0.17	9.05	0.01	0.07	0.02	0.03	95.33
8-4-5	bte	core		35.49	3.09	14.19	21.87	10.01	0.31	0.1	0.15	9.09	0.03	0.06		0.04	94.43
8-4-5	plag	core	a	57.38		26				7.79	8.04	0.16					99.37	64.6	34.6	0.9
8-4-5	plag	mid	a	57.41		25.91				7.91	7.91	0.15					99.29	63.9	35.3	0.8
8-4-5	plag	rim	a	58.78		25.54				7.27	8.21	0.15					99.95	66.6	32.6	0.8
8-4-5	plag	rim	b	58.84		24.9				7.22	8.17	0.14					99.27	66.7	32.6	0.8
8-4-5	plag	core	b	57.08		26.26				8.31	7.64	0.15					99.44	61.9	37.3	0.8
8-4-5	plag	rim	b	59.04		24.9				7.48	7.91	0.13					99.46	65.2	34.1	0.7
8-4-5	plag	rim	c	59.37		24.7				6.74	8.43	0.15					99.39	68.8	30.4	0.8
8-4-5	plag	mid	c	59.11		25.49				7.19	7.84	0.24					99.87	65.5	33.2	1.3
8-4-5	plag	core	c	57.2		25.84				8.56	7.31	0.19					99.1	60.1	38.9	1
8-4-5	amp	rim	a	45.2	1.62	9.14	16.56	11.62	0.53	12.01	1.45	0.98		0.03	0.04	0.37	99.55
8-4-5	amp	core	a	45.14	1.31	9.48	17.03	11.05	0.67	11.9	1.44	1		0.04	0.07	0.03	99.16
8-4-5	amp	rim	a	48.76	0.71	6.35	15.18	13.23	0.66	12.04	1.02	0.53		0.02	0.03		98.53
8-4-5	amp	rim	b	47.21	1.37	7.48	15.56	12.3	0.55	12	1.26	0.76		0.02	0.08	0.19	98.78
8-4-5	amp	core	b	47.58	1.18	7.93	16.06	12.08	0.58	12.19	1.22	0.75		0.01	0.08		99.66
8-4-5	amp	rim	b	46.73	1.26	7.73	16.08	12.09	0.59	11.9	1.25	0.79		0.04	0.06	0.27	98.79
8-4-5	amp	rim	c	48.41	0.71	6.5	15.36	12.62	0.59	12.06	1.14	0.63		0.02	0.08	0.22	98.34
8-4-5	amp	core	c	48.81	0.86	7.19	15.16	12.47	0.62	12.16	1.08	0.68		0.03	0.07	0.42	99.55
8-4-5	amp	rim	c	48.13	0.83	6.65	15.93	12.25	0.62	11.97	1.09	0.7			0.05	0.47	98.69
8-4-5	amp	rim	d	46.98	1.09	7.66	15.91	12.04	0.52	12.05	1.05	0.77		0.04	0.08	0.23	98.42
8-4-5	amp	core	d	46.93	1.42	7.28	15.67	12.06	0.67	11.92	1.23	0.72		0.05	0.03		97.98
8-4-5	amp	rim	d	47.08	1.03	7.16	16.47	11.96	0.61	11.85	1.16	0.78	0.04	0.05	0.03	0.45	98.67
8-4-5	bte	rim	a	36.98	2.38	14.98	18.03	11.97	0.46	0.07	0.13	9.4		0.05	0.03		94.48
8-4-5	bte	core	a	37.16	2.39	14.29	18.12	11.69	0.53	0.01	0.13	9.55		0.08	0.05	0.42	94.42
8-4-5	bte	rim	b	37.02	2.39	14.56	18.64	12.26	0.48	0.02	0.16	9.4	0.01	0.06	0.09		95.09
8-4-5	bte	core	b	37.49	2.41	15.13	18.3	12.53	0.49	0.01	0.15	9.54		0.06	0.11		96.22
8-4-5	chl			27.19	0.09	17.54	23.54	17.1	0.77	0.04	0.04	0.05	0.03	0.04	0.05	0.52	87
8-4-5	sph	rim	a	31.11	37.96	1.54	1.34	0.05	0.15	28.02	0.04	0.03		0.15	0.05	0.42	100.86
8-4-5	sph	core	a	30.71	38.14	1.78	1.43	0.05	0.19	27.97	0.04			0.15	0.03	0.19	100.68
8-4-5	sph	rim	a	31.08	38.63	1.34	1.19	0.03	0.13	27.58	0.07	0.01		0.08	0.06		100.2
8-4-5	sph	rim	b	30.81	38.2	1.42	1.3	0.06	0.09	27.99	0.04	0.03		0.14	0.06	0.25	100.39
8-4-5	sph	cpre	b	30.62	38.11	1.6	1.19	0.05	0.13	27.86	0.06	0.03		0.1	0.03	0.13	99.91
8-4-5	sph	rim	b	29.87	37.95	1.76	1.36	0.06	0.14	27.76	0.04	0.03		0.02	0.08	0.58	99.65
8-4-5	mt	rim	a		0.02	0.48	90.79	0.04	0.07	0.02	0.11	0.01	0.04	0.18	0.08		91.84
8-4-5	mt	core	a			0.09	91.1	0.05	0.09	0.01	0.04	0.01	0.02	0.18	0.07		91.66
8-4-5	mt	rim	a		0.14		91.66	0.03	0.05	0.05	0.1		0.03	0.21	0.05		92.32
8-4-6	amp	rim	a	47.89	0.52	7.69	17.35	11.26	0.47	11.97	1.07	0.45	0.02	0.05	0.09	0.09	98.92
8-4-6	amp	core	a	46.71	1.29	8.21	17.54	10.87	0.49	12.06	1.14	0.9		0.03	0.03	0.37	99.64
8-4-6	amp	rim	b	47.71	1.39	6.96	16.63	11.76	0.5	12.07	1.08	0.77		0.02	0.02	0.04	98.95
8-4-6	amp	mid	b	47.44	1.28	7.48	17.1	11.56	0.52	12.06	1.07	0.73			0.09	0.37	99.7
8-4-6	amp	core	b	45.33	1.3	8.27	17.37	10.7	0.42	11.99	1.37	0.9			0.03	0.37	98.05
8-4-6	amp	rim	c	45.9	1.22	8.09	16.99	10.43	0.45	11.67	1.11	0.87		0.04	0.03	0.04	96.84
8-4-6	amp	core	c	47.1	1.38	6.66	16.43	11.76	0.51	11.99	1.05	0.77	0.02	0.01	0.03	0.29	98
8-4-6	amp	rim	c	46.22	1.55	8.09	17.31	11.11	0.46	11.83	1.25	0.86	0.03	0.03	0.02		98.76
8-4-6	mt	core	a		0.01	0.3	91.84	0.05	0.1	0.04	0.04		0.09	0.39	0.1		92.96
8-4-6	mt	rim	a		0.02	0.53	91.95	0.04	0.11	0.04	0.04		0.01	0.41	0.06		93.21
8-4-6	plag	rim	a	58.85		24.43				7.68	7.98	0.15					99.09	64.8	34.4	0.8
8-4-6	plag	mid	a	58.77		24.55				7.81	7.93	0.18					99.24	64.1	34.9	1
8-4-6	plag	mid	a	58.46		24.88				7.76	7.93	0.13					99.16	64.5	34.9	0.7
8-4-6	plag	core	a	58.56		25.21				8	7.66	0.16					99.59	62.9	36.3	0.8
8-4-6	plag	mid	a	58.6		25.16				7.72	7.84	0.21					99.53	64	34.9	1.1
8-4-6	plag	rim	a	58.6		25.25				7.59	8.07	0.17					99.68	65.2	33.9	0.9
8-4-6	plag	rim	b	58.79		24.69				7.41	7.95	0.17					99.01	65.4	33.7	0.9
8-4-6	plag	core	b	58.45		25.24				8.63	7.27	0.13					99.72	60	39.3	0.7
8-4-6	plag	rim	b	59.43		24.53				7.19	8.12	0.11					99.38	66.7	32.7	0.6
8-4-6	plag	mid	c	59.19		24.78				7.54	7.86	0.17					99.54	64.8	34.3	0.9
8-4-6	plag	mid	c	59.49		24.64				7.43	8.11	0.12					99.79	66	33.4	0.6
8-4-6	plag	rim	c	59.71		24.67				6.87	8.11	0.2					99.56	67.4	31.6	1.1
8-4-6	bte	core	a	37.73	3.84	14.03	19	11.22	0.31		0.13	9.65		0.09	0.09	0.34	96.43
8-4-6	bte	rim	a	37.02	3.91	14.28	20.03	11.15	0.31		0.11	9.58		0.04	0.04		96.47
8-4-6	bte	rim	b	37.76	4	14.11	19.57	11.3	0.33	0.02	0.14	9.64		0.06	0.08		97.01
8-4-6	bte	core	b	37.98	4.12	14.01	19.75	11.04	0.38		0.12	9.42		0.04	0.08	0.15	97.09
8-4-6	bte	rim	b	38.65	3.92	14.15	19.62	10.98	0.26	0.03	0.19	9.4	0.04	0.08	0.06	0.86	98.24
8-4-6	bte	rim	c	37.7	4.03	14.01	19.91	11.2	0.25		0.13	9.58	0.01	0.07	0.04		96.93
8-4-6	bte	core	c	38.56	3.8	13.97	20	11.16	0.35		0.13	9.67	0.02	0.09	0.1	0.15	98
8-4-6	bte	rim	c	38.24	3.43	14.06	19.86	11.15	0.3	0.03	0.12	9.59		0.04	0.05	0.24	97.11
8-4-6	bte	rim	d	37.66	3.66	14.04	18.94	11.04	0.25		0.12	9.5		0.04	0.12	0.38	95.75
8-4-6	bte	core	d	38.02	3.65	14.33	19.69	11.55	0.29		0.11	9.58		0.04	0.11	0.4	97.77
8-4-6	bte	rim	d	38.33	3.81	14.72	19.6	10.99	0.4		0.17	9.36		0.04	0.1	0.2	97.72
8-4-6	sph	core	a	31.06	37.39	3.05	0.61	0.01	0.05	27.94	0.04			0.06	0.06		100.27
8-4-6	sph	rim	a	31.13	37.76	1.9	0.73	0.03	0.07	28.05	0.04			0.16	0.02	0.18	100.07
8-4-7	amp	rim	a	52.73	0.29	3.86	12.62	15.09	1.02	12.09	0.74	0.29	0.02		0.06		98.81
8-4-7	amp	core	a	52.24	0.31	3.44	13.04	14.06	0.93	12.06	0.8	0.3		0.02			97.2
8-4-7	bte	rim	a	38.38	4.04	13.46	18.6	11.5	0.6	0.02	0.11	9.51		0.03	0.05		96.3
8-4-7	bte	core	a	37.63	4.05	13.41	18.48	11.53	0.66	0.02	0.09	9.35	0.04		0.08	0.29	95.63
8-4-7	bte	rim	a	38.32	3.93	13.17	18.06	11.38	0.64	0.02	0.13	9.65	0.03	0.02	0.05	0.26	95.66
8-4-7	sph	core	a	31.51	37.47	1.22	1.35	0.02	0.17	27.97	0.09	0.01		0.15	0.04	0.31	100.31
8-4-7	sph	rim	a	31.23	37.64	1.19	1.38	0.03	0.2	27.54	0.06	0.02		0.07	0.05		99.41
8-4-7	mt	rim	a			0.5	91.81	0.05	0.1	0.04			0.03	0.17	0.05		92.75
8-4-7	mt	core	a		0.01		91.97	0.01	0.08	0.02	0.05	0.02		0.19	0.05		92.4
8-4-7	mt	rim	a		0.03	0.48	91.48	0.04	0.07	0.04	0.08	0.02	0.05	0.19	0.07		92.55
8-4-7	mt	rim	b		0.01	0.49	91.9		0.09	0.02	0.02	0.01		0.21	0.06		92.81
8-4-7	mt	core	b		0.02	0.27	92.16	0.04	0.11	0.04	0.05		0.03	0.23	0.11		93.06
8-4-7	mt	rim	b		0.01	0.21	92.03	0.03	0.11	0.06	0.02	0.01		0.2	0.09		92.77
8-4-7	plag	rim	a	65.1	0.02	19.77				5.33	9.22	0.2					99.64	75	24	1.1
8-4-7	plag	xore	a	59.83	0.02	23.95				7.79	7.86	0.17					99.62	64	35.1	0.9
8-4-7	plag	mid	a	61.95		22.04				6.92	8.25	0.16					99.32	67.7	31.4	0.9
8-4-7	plag	mid	a	61.87		22.29				6.59	8.57	0.18					99.5	69.5	29.6	0.9
8-4-7	plag	rim	b	64.87	0.01	20.26				3.99	9.97	0.36					99.46	80.3	17.8	1.9
8-4-7	plag	mid	b	65.11	0.02	20.2				4.06	9.79	0.34					99.52	79.9	18.3	1.9
8-4-7	plag	mid	b	64.13		20.54				4.96	9.45	0.26					99.34	76.5	22.2	1.4
8-4-7	plag	core	b	63.58		20.96				4.83	9.4	0.31					99.08	76.6	21.8	1.7
8-4-8	plag	rim	a	60.58		24.35				5.64	9	0.18					99.75	73.6	25.5	1
8-4-8	plag	mid	a	58.51		25.91				7.41	8	0.17					100	65.5	33.5	0.9
8-4-8	plag	core	a	57.84		26.31				7.91	7.79	0.15					100	63.5	35.7	0.8
8-4-8	plag	rim	b	62.13		23.1				4.36	9.94	0.25					99.78	79.4	19.3	1.3
8-4-8	plag	mid	b	60.33		24.16				5.69	9.14	0.19					99.51	73.7	25.3	1
8-4-8	plag	rim	b	66.7		19.66				0.54	12.12	0.12					99.14	97	2.4	0.6
8-4-8	plag	rim	c	62.54		22.91	0.02	0.01		3.71	10.19	0.08					99.46	82.9	16.7	0.5
8-4-8	plag	mid	c	58.67		25.19				6.83	8.38	0.17					99.24	68.36	30.8	0.9
8-4-8	plag	rim	c	61.99		23.02				4.51	9.52	0.18					99.22	78.5	20.6	1
8-4-8	amp	core	a	50.19	0.63	5.28	13.52	14.55	0.87	11.87	1.11	0.41		0.03	0.07	0.51	99.04
8-4-8	amp	mid	a	47.04	1.18	7.23	15.33	12.45	0.82	11.63	1.62	0.81	0.01	0.02		0.8	98.94
8-4-8	amp	rim	a	48.94	0.89	6.79	15.12	13.47	0.71	11.74	1.36	0.61			0.04		99.67
8-4-8	amp	rim	b	49.79	0.63	5.26	13.67	14.54	0.81	11.89	1.05	0.4			0.04	0.77	98.85
8-4-8	amp	core	b	49.81	0.61	5.01	13.42	14.68	0.7	12.15	1.04	0.4	0.01		0.08	0.9	98.81
8-4-8	amp	rim	b	49.9	0.71	5.02	13.5	14.49	0.81	11.92	1.11	0.41			0.03	0.31	98.21
8-4-8	bte	rim	a	38.22	3.13	14.28	17.56	12.92	0.59	0.01	0.11	9.56	0.01	0.04	0.06	0.59	97.08
8-4-8	bte	core	a	38.47	3.28	14.35	17.58	12.63	0.56		0.1	9.25		0.04	0.05	0.12	96.43
8-4-8	bte	rim	a	38.31	3.28	13.7	17.8	12.86	0.61		0.12	9.55				0.18	96.41
8-4-8	chl	rim	a	27.94		19.31	20.41	18.46	1.09	0.03	0.02	0.01		0.04	0.05	0.47	87.83
8-4-8	chl	core	b	27.41	0.04	20.2	20.09	17.92	1.22		0.01	0.01		0.05	0.09	0.22	87.26
8-4-8	chl	rim	c	28.34		17.99	20.23	19.46	0.94	0.03	0.01	0.03			0.09	0.08	87.2
8-4-8	epd		a	34.07	2.14	8.58	15.87	0.09	0.53	33.83	0.07			0.1	0.03	0.31	95.62
8-4-8	mt	rim	a	0.04	0.53	91.26	0.26		0.03	0.07		0.02	0.25	0.08			92.54
8-4-8	mt	core	a	0.04	0.47	91.81	0.2		0.01	0.01	0.01	0.03	0.25	0.08			92.91
8-4-8	mt	rim	a	0.02	0.18	89.71	0.25				0.01	0.02	0.25	0.05			90.49
8-4-8	mt	rim	b	0.22	0.02	0.54	92.21		0.15	0.02	0.02		0.06	0.17	0.05		93.46
8-4-8	mt	core	b		0.05	0.53	92.01		0.15				0.04	0.21	0.11		93.1
8-4-8	mt	rim	b		0.01	0.61	91.2	0.01	0.11	0.01	0.04	0.01		0.22	0.1		92.32
8-4-9	plag	rim	a	58.78		24.66				8.23	7.71	0.16					99.54	62.3	36.8	0.9
8-4-9	plag	mid	a	58.94		24.57				7.8	7.61	0.18					99.1	63.2	35.8	1
8-4-9	plag	core	a	57.35		26.53				8.09	7.48	0.2					99.65	61.9	37	1.1
8-4-9	plag	mid	a	57.23	0.01	25.8				8.18	7.59	0.21					99.02	62	36.9	1.1
8-4-9	plag	rim	a	58.22	0.02	25.56				7.7	7.9	0.22					99.62	64.2	34.6	1.2
8-4-9	amp	core	a	50.59	0.68	5.64	13.98	13.74	0.78	12.34	1.13	0.49		0.01	0.05	0.14	99.57
8-4-9	amp	rim	b	53.81	0.13	3.53	12.22	15.45	0.82	12.21	0.65	0.19	0.05		0.03	0.02	99.11
8-4-9	amp	rim	c	52.17	0.34	4.52	12.39	15.17	0.75	12.31	0.91	0.29			0.05	0.04	98.94
8-4-9	amp	core	c	48.46	0.87	6.84	14.54	13.21	0.76	11.92	1.37	0.65	0.01		0.06		98.69
8-4-9	amp	rim	c	50.44	0.7	6.08	13.79	13.83	0.79	11.89	1.16	0.49			0.03	0.51	99.71
8-4-9	amp	core	d	46.96	0.67	5.81	13.87	14.5	0.72	12.1	1.12	0.43	0.01			0.06	96.25
8-4-9	amp	rim	e	47.82	1.02	7.22	15.55	12.82	0.72	11.91	1.3	0.73			0.07		99.16
8-4-9	amp	core	e	47.42	0.9	6.46	14.69	13.56	0.77	11.9	1.31	0.69			0.1		97.8
8-4-9	amp	rim	e	51.84	0.32	4.82	13.04	14.74	0.65	12.22	0.85	0.34		0.03	0.05	0.14	99.04
8-4-9	bte	core		39.22	2.5	14.64	17.2	13.14	0.63	0.07	0.17	9.4		0.03	0.03	0.28	97.31
8-4-9	bte	rim		38.75	2.41	14.95	17.37	12.94	0.56	0.03	0.13	9.49		0.04	0.11	0.42	97.2
8-4-9	bte	mid		37.95	2.8	14.9	17.75	12.76	0.59	0.11	0.14	8.91		0.08	0.05	0.51	96.55
8-4-9	bte	core		38.67	2.64	14.9	17.27	12.84	0.54	0.05	0.17	9.26		0.05	0.09	0.26	96.74
8-4-9	bte	rim		38.69	2.56	14.66	17.09	13.21	0.47	0.17	0.13	9.11		0.06	0.03	0.27	96.45
8-4-9	sph		a	30.98	37.06	1.42	1.38	0.04	0.16	27.45	0.04	0.02		0.24	0.1	0.5	99.39
8-4-9	sph		b	30.65	37.09	1.14	1.24	0.05	0.14	27.58	0.03			0.37	0.08	0.71	99.08
8-4-9	sph		c	31.03	38.1	1.2	1.48	0.05	0.19	27.16	0.08	0.02		0.26	0.08	0.5	100.15
8-4-9	sph		d	30.72	37.57	1.57	1.5	0.04	0.15	27.14	0.06			0.22	0.06	0.33	99.36
8-4-9	mt	core	a			0.69	91.3	0.06	0.22	0.02	0.02			0.22	0.04		92.57
8-4-9	mt	rim	a		0.08	0.83	91.75	0.03	0.14	0.07	0.03		0.01	0.23	0.08		93.25
8-4-9	mt	core	b		0.04	0.75	91.77	0.03	0.15		0.03	0.01	0.02	0.22	0.04		93.06
8-4-9	mt	rim	b		0.24	0.43	91.15	0.04	0.13	0.13	0.07	0.02		0.22	0.11	0.37	92.91
8-4-11	ksp	rim	a	65.94	0.01	17.9				0.01	1.11	14.66					99.63	10.3	0.1	89.6
8-4-11	plag	rim	a	66.89		19.77				0.21	12.2	0.13					99.2	98.4	0.9	0.7
8-4-11	plag	mid	a	62.53		22.84				4.06	10.06	0.23					99.72	80.8	18	1.2
8-4-11	plag	rim	b	62.59		22.73				4.08	10	0.06					99.46	81.3	18.3	0.3
8-4-11	plag	mid	b	60.58		24.22				5.97	8.71	0.29					99.77	71.4	27	1.5
8-4-11	plag	core	b	60.06		24.61				6.38	8.7	0.17					99.92	70.5	28.6	0.9
8-4-11	plag	rim	c	60.13		24.53				6.1	8.84	0.17					99.77	71.7	27.4	0.9
8-4-11	plag	mid	c	60.55		24.7				6.03	8.88	0.19					100.35	72	27	1
8-4-11	plag	mid	c	60.69		24				6.03	8.81	0.17					99.7	71.9	27.2	0.9
8-4-11	plag	core	c	60.17		24.48				6.3	8.83	0.2					99.98	70.9	28	1.1
8-4-11	bte	core	a	38.59	2.53	14.21	15.98	13.5	0.79	0.02	0.17	9.5		0.03	0.06	0.48	95.86
8-4-11	bte	mid	a	37.99	2.65	13.94	16.62	13.51	0.78	0.02	0.13	9.54			0.02	0.36	95.56
8-4-11	bte	rim	a	38.31	2.54	13.41	15.99	13.61	0.7	0.03	0.15	9.48		0.04	0.06	0.46	94.78
8-4-11	mu	rim	a	46.3		36.71	0.36	0.07	0.1	0.04	0.11	10.91			0.03	0.22	94.85
8-4-11	mu	core	a	45.97	0.01	36.06	0.45	0.11	0.1	0.03	0.14	10.96			0.08	0.35	94.26
8-4-11	mu	rim	a	45.67		36.08	0.17	0.07	0.02	0.05	0.16	10.94			0.1		93.26
8-4-11	sph	core	a	30.7	37.77	1.25	1.19	0.05	0.14	27.27	0.08	0.01		0.2	0.08	0.19	68.23
8-4-11	sph	rim	a	31.03	36.98	1.93	1.48	0.03	0.18	27.52	0.05	0.03		0.28	0.04	0.52	100.07
8-4-11	sph	mid	b	30.65	37.63	1.57	1.49	0.04	0.16	27.41	0.07	0.01		0.18	0.07	0.44	99.72
8-4-11	sph	mid	c	30.41	37.89	1.1	1.48	0.04	0.15	27.38	0.04			0.31	0.01	0.43	99.24
8-4-11	sph	rim	d	30.89	37.87	1.27	1.7	0.03	0.24	27.72	0.06	0.02		0.23	0.04	0.43	100.5
8-4-11	sph	core	d	30.12	38.42	1.32	1.21	0.03	0.13	27.17	0.05			0.23	0.02	0.1	98.8
8-4-11	sph	core	e	31.07	37.21	1.07	1.44	0.03	0.141	27.57	0.05	0.03		0.28	0.03	0.27	99.191
8-4-11	sph	rim	e	31.04	37.28	1.65	1.73	0.04	0.18	28.26	0.04	0.01		0.18	0.03		100.44
8-4-11	mt	rim	a		0.03	0.55	90.62	0.04	0.44	0.01	0.03	0.02	0.03	0.23	0.09		92.09
8-4-11	mt	core	a			0.27	90.96	0.02	0.51	0.01	0.08	0.02		0.24	0.1		92.21
8-4-11	mt	rim	a				90.91	0.03	0.51		0.07	0.04	0.04	0.25	0.04		91.89
8-4-11	mt	rim	b		0.01	0.77	91.02	0.04	0.31	0.06	0.06	0.03		0.23	0.09		92.62
8-4-11	mt	core	b		0.03	0.65	92.62	0.05	0.34		0.06			0.2	0.09		94.04
8-4-11	mt	rim	b		0.06	0.73	91.95	0.06	0.2	0.1	0.04	0.01		0.22	0.06		93.43
8-4-11	ilm		a	0.22	42.66	0.11	51.01	0.09	1.19	0.04	0.06			0.18	0.04		95.6
Sierra Nevada - Lake Isabella transect
8-5-2	plag	rim	a	67.94	0.04	19.68				0.29	11.51	0.15					99.61	97.8	1.4	0.8
8-5-2	plag	mid	a	63.44		22.54				4.18	9.43	0.18					99.77	79.5	19.5	1
8-5-2	plag	core	a	62.6		23.36				4.48	8.78	0.19					99.41	75.7	23.2	1.1
8-5-2	plag	core	b	62.45		23.26				4.9	9	0.2					99.81	76	22.9	1.1
8-5-2	plag	mie	b	67.26	0.01	20.12				0.82	11.19	0.1					99.5	95.6	3.9	0.6
8-5-2	plag	rim	b	67.9	0.01	19.85				0.33	11.53	0.13					99.75	97.8	1.5	0.7
8-5-2	ksp	rim	a	64.63	0.03	18.29				0.04	0.86	15.82					99.67	7.6	0.2	92.2
8-5-2	ksp	core	a	64.4	0.02	18.68				0.02	0.5	16.01					99.63	4.5	0.1	95.4
8-5-2	ksp	core	b	64.64		18.26					0.51	16.42					99.83	4.5	0	95.5
8-5-2	ksp	rim	b	64.45	0.01	18.61					0.47	16.46					100	4.2	0	95.8
8-5-2	bte	core	a	35.36	3.37	16.52	21.99	7.42	0.41		0.05	9.39		0.04		0.22	94.77
8-5-2	bte	rim	a	36.54	3.33	16.3	21.49	8.04	0.41		0.07	9.62			0.09	0.06	95.95
8-5-2	bte	rim	b	36.3	2.83	15.66	21.93	8.14	0.39		0.1	9.58	0.01		0.04	0.39	95.37
8-5-2	bte	core	b	36.47	2.99	15.85	21.79	8.26	0.47		0.06	9.42			0.08	0.36	95.75
8-5-2	bte	rim	b	36.61	2.65	15.81	22.37	8.57	0.45	0.01	0.08	9.46	0.01			0.38	96.4
8-5-2	bte	mid	c	36.29	2.3	15.5	21.77	8.59	0.39	0.01	0.08	9.42			0.02	0.61	94.98
8-5-2	bte	mid	d	36.56	2.67	16.02	22.28	8.49	0.34	0.01	0.09	9.45			0.06	0.38	96.35
8-5-2	bte	mid	e	36.05	2.64	15.82	21.25	8.61	0.4		0.07	9.3			0.04	0.52	94.7
8-5-2	bte	core	f	36.33	2.42	16.4	21.58	8.32	0.35	0.02	0.06	9.72			0.03		95.23
8-5-2	bte	rim	f	36.27	2.81	16.41	21.88	8.12	0.43		0.07	10.01			0.03		96.03
8-5-2	bte	rim	g	35.56	3.09	16.01	22.19	7.97	0.5		0.05	9.65					95.02
8-5-2	bte	core	g	35.91	3.08	16.42	21.46	8.2	0.5		0.05	9.85	0.03				95.5
8-5-2	bte	rim	g	35.81	2.74	15.96	22.71	8.6	0.42		0.05	9.7	0.03		0.02		96.04
8-5-2	bte	core	h	35.59	2.72	16.18	21.68	8.17	0.38	0.01	0.13	9.9					94.76
8-5-2	bte	rim	h	36.04	2.68	16.11	22	8.15	0.33	0.01	0.06	9.92					95.3
8-5-2	mu	rim	a	47.01	0.89	28.77	5.58	1.5	0.03		0.25	10.31			0.02	0.13	94.49
8-5-2	mu	core	a	46.68	0.85	28.72	5.54	1.62	0.08		0.3	10.51					94.3
8-5-2	mu	rim	a	46.8	1.1	28.17	5.37	1.55	0.09		0.22	10.4			0.05	0.49	94.24
8-5-2	mu	mid	a	47.2	0.6	28.41	5.96	1.68	0.09		0.19	10.46			0.05		94.64
8-5-2	mt	rim	a	0.11	0.07	0.2	89.74		0.15	0.01	0.01	0.03	0.01	0.1	0.08		90.51
8-5-2	mt	core	a	0.08	0.1	0.1	90.71	0.01	0.1		0.06			0.09			91.25
8-5-5	plag	core	a	58.72		25.13				7.45	7.77	0.26					99.33	64.5	34.2	1.4
8-5-5	plag	mid	a	59.35		25.02				7.17	8.09	0.32					99.95	66	32.3	1.7
8-5-5	plag	mid	a	60.31		24.35				6.89	8.01	0.3					99.86	66.7	31.7	1.6
8-5-5	plag	mid	a	59.42		24.67				6.74	8.13	0.27					99.23	67.6	31	1.5
8-5-5	plag	rim	a	60.1		24.4				6.64	8.3	0.17					99.61	68.7	30.4	0.9
8-5-5	amp	rim	a	43.43	1.21	9.17	18.18	10.68	0.47	11.8	1.34	1.11			0.09		97.48
8-5-5	amp	rim	b	45.09	1.3	7.6	16.92	11.74	0.53	11.88	1.26	0.97			0.04		97.33
8-5-5	amp	mid	b	45.59	1.36	7.49	16.43	12.04	0.51	11.8	1.13	0.81					97.16
8-5-5	amp	core	b	45.31	1.31	7.45	16.34	12.15	0.51	11.92	1.22	0.84			0.04		97.09
8-5-5	amp	core	c	44.81	1.55	8.1	16.96	11.54	0.54	11.78	1.29	0.95			0.02		97.54
8-5-5	amp	rim	d	44.04	1.3	8.87	17.59	11.16	0.48	11.96	1.16	1	0.06		0.07		97.69
8-5-5	amp	core	d	44.71	1.35	8.02	17.11	11.44	0.53	11.77	1.17	0.91			0.05		97.06
8-5-5	bte	rim	a	36.43	2.19	15.71	17.84	11.82	0.43	0.03	0.12	9.46			0.05	0.13	94.21
8-5-5	bte	core	a	36.24	2.34	15.2	18.36	11.73	0.36	0.02	0.13	9.47			0.04	0.18	94.07
8-5-5	bte	rim	b	37.17	1.46	15.46	18.46	12.26	0.4	0.03	0.12	9.31	0.01		0.05	0.04	94.77
8-5-5	bte	core	b	36.55	2.28	15.54	18.73	11.68	0.32	0.01	0.12	9.61			0.08	0.32	95.24
8-5-5	bte	rim	b	36.99	1.95	15.42	18.02	12.05	0.4	0.01	0.11	9.36			0.02		94.33
8-5-5	chl	rim		25.77	0.06	19.61	20.17	19.04	0.62		0.02	0.04	0.05	0.02	0.05	0.08	85.53
8-5-5	chl	core		25.96	0.02	20.17	19.86	19.33	0.67		0.01	0.01	0.02	0.02	0.06		86.13
8-5-5	chl	rim		25.95	0.04	19.88	20.18	18.51	0.62	0.01	0.03	0.03	0.02	0.04			85.31
8-5-5	sph			30.42	37.42	1.38	1.47	0.02	0.15	27.14	0.03	0.01			0.03		98.07
8-5-5	sph			30.73	37.7	1.27	1.08	0.03	0.22	26.93	0.04				0.06		98.06
8-5-5	mt	core	a		0.02	0.2	91.85	0.01	0.1	0.06		0.02	0.03	0.22	0.04		92.55
8-5-5	mt	rim	a		0.01	0.46	91.73	0.03	0.11	0.07	0.05	0.02	0.07	0.15	0.06		92.76
8-5-5	mt	core	b		0.01		92.28		0.07	0.07			0.04	0.19			92.66
8-5-5	mt	rim	b		0.02		91.92		0.09	0.24			0.03	0.14	0.04		92.48
8-5-7	plag	core	a	58.18		25.64				7.34	7.9	0.19					99.25	65.4	33.6	1
8-5-7	plag	rim	a	58.89		25.06				6.36	8.8	0.14					99.25	70.9	28.3	0.7
8-5-7	plag	core	b	58.12		25.87				7.6	7.9	0.12					99.61	64.9	34.5	0.7
8-5-7	plag	rim	b	59.88		24.53				5.77	9.08	0.12					99.38	73.5	25.8	0.6
8-5-7	plag	rim	c	58.56		25.08				6.57	8.58	0.23					99.02	69.4	29.4	1.3
8-5-7	plag	core	c	56.78		26.8				8.67	7.35	0.15					99.75	60.1	39.2	0.8
8-5-7	plag	rim	c	57.81		25.95				7.76	7.79	0.18					99.49	63.9	35.2	1
8-5-7	ksp	rim	a	63.98	0.02	19.1	0.01			0.01	0.57	15.73					99.42	5.2	0	94.8
8-5-7	amp	core	a	43.24	1.02	10.82	22.08	6.93	0.52	11.71	1.26	1.17		0.04	0.03	0.34	99.16
8-5-7	amp	rim	a	42.63	1.65	10.29	22.2	6.9	0.65	11.73	1.28	1.14	0.01	0.04	0.02	0.11	98.65
8-5-7	amp	rim	b	44.38	1.24	9.32	21.13	7.76	0.65	11.4	1.34	0.91		0.02	0.02	0.86	99.03
8-5-7	amp	core	b	45.07	1.18	8.88	20.91	8.01	0.73	11.39	1.41	0.97	0.02	0.01	0.02	0.43	99.03
8-5-7	amp	rim	b	43.97	1.29	9.78	21.16	7.49	0.57	11.6	1.36	1.03		0.02	0.05	0.1	98.42
8-5-7	bte	rim	a	36.13	3.63	15.4	22.71	7.72	0.47	0.04	0.11	9.32		0.04			95.57
8-5-7	bte	core	a	36.55	3.63	15.54	22.58	7.58	0.42	0.03	0.12	9.42		0.03	0.07		95.97
8-5-7	bte	rim	a	36.71	3.4	15.47	22.99	7.83	0.46	0.1	0.12	9.41		0.02	0.03		96.54
8-5-7	bte	rim	b	37.18	3.82	15.36	21.73	8.31	0.39		0.13	9.46		0.04	0.04	0.16	96.62
8-5-7	bte	core	b	37.23	3.52	16.08	21.34	7.94	0.37	0.01	0.12	9.43		0.05	0.03	0.45	96.57
8-5-7	bte	rim	b	37.58	3.49	15.87	21.78	7.86	0.4	0.02	0.12	9.47		0.05		0.04	96.68
8-5-7	bte	rim	c	37.42	3.06	16.34	21.69	7.69	0.34		0.08	9.4		0.05	0.08	0.39	96.54
8-5-7	bte	core	c	36.59	3.68	15.12	22.23	7.63	0.47	0.01	0.08	9.24	0.02	0.02	0.02	0.66	95.77
8-5-7	bte	rim	c	36.96	3.6	15.61	22.23	7.92	0.44	0.04	0.07	9.32	0.05	0.03	0.07	0.58	96.92
8-5-7	bte	rim	d	36.88	3.01	15.36	21.92	7.81	0.47	0.01	0.14	9.27			0.05	0.29	95.21
8-5-7	bte	core	d	36.83	3.07	16.02	22.26	7.78	0.41		0.1	9.26			0.1		95.83
8-5-7	bte	rim	d	36.8	2.85	15.94	22.52	7.77	0.4		0.05	9.16			0.02	0.56	96.07
8-5-7	chl		a	26.13	0.08	19.32	30.01	12.01	0.81	0.06	0.04	0.08			0.03		88.57
8-5-7	mt	core	a		0.06	0.32	91.89		0.06	0.05		0.01		0.06	0.04		92.49
8-5-7	mt	rim	a		0.02	0.27	89.65	0.02	0.06	0.07	0.03			0.05	0.07		90.24
8-5-7	mt	rim	b		0.09	0.7	91.65	0.01	0.08	0.01	0.03	0.02	0.03	0.1	0.09		92.81
8-5-7	mt	core	b		0.08	0.46	92.09		0.08	0.01	0.01	0.01	0.06	0.1	0.05		92.95
8-5-7	mt	rim	b		0.07	0.92	91.33		0.05		0.05	0.05		0.09	0.09		92.65
8-5-8	plag	core	a	56.91		26.3				8.61	7.5	0.17					99.49	60.6	38.5	0.9
8-5-8	plag	mid	a	56.93		26.45				8.44	7.41	0.16					99.39	60.8	38.3	0.9
8-5-8	plag	mid	a	57.39		26.26				8.18	7.6	0.11					99.54	62.4	37.1	0.6
8-5-8	plag	rim	a	56.79		26.32				8.17	7.75	0.09					99.12	62.9	36.6	0.5
8-5-8	plag	core	b	55.99		27.12				9.27	7.04	0.1					99.52	57.6	41.9	0.5
8-5-8	plag	mid	b	58.13		25.61				7.97	7.89	0.16					99.76	63.6	35.5	0.9
8-5-8	plag	rim	b	58.84		25.22				6.56	8.7	0.13					99.45	70.1	29.2	0.7
8-5-8	amp	rim	a	44.43	1.62	8.86	19.73	9.01	0.6	11.7	1.46	1.08		0.04		0.04	98.57
8-5-8	amp	core	a	45	1.74	9.24	19.26	8.91	0.52	11.65	1.4	1.05	0.01	0.03	0.06	0.16	99.03
8-5-8	amp	rim	a	44.51	1.56	9.21	19.53	9.06	0.48	11.73	1.39	1.08			0.03	0.16	98.74
8-5-8	amp	rim	b	44.38	1.25	9.24	19.74	8.91	0.5	11.91	1.24	1.01		0.02	0.06		98.26
8-5-8	amp	core	b	43.94	11.78	9.04	19.75	8.68	0.58	11.76	1.55	0.99			0.03	0.48	108.58
8-5-8	amp	rim	b	45.57	1.17	8.81	19.66	9.05	0.49	12.1	1.3	0.99			0.02	0.11	99.27
8-5-8	amp	rim	c	44.73	1.55	9.12	19.92	8.72	0.42	11.9	1.29	1.09		0.04	0.05		98.83
8-5-8	amp	core	c	44.13	1.72	9.63	20.38	8.49	0.53	11.84	1.54	1.15	0.01	0.04	0.09	0.16	99.71
8-5-8	amp	mid	d	44.69	1.47	9.26	19.84	8.88	0.57	11.66	1.4	1.09		0.05	0.09	0.13	99.13
8-5-8	amp	mid	e	44.73	1.47	9.47	19.89	9.01	0.6	12	1.28	1.08		0.06	0.06		99.65
8-5-8	amp	rim	f	43.94	0.88	9.62	19.47	8.95	0.53	11.95	1.29	1.01		0.07	0.05		97.76
8-5-8	amp	core	f	43.66	1.21	9.53	19.87	8.92	0.48	11.71	1.45	1.05	0.01	0.05	0.09		98.03
8-5-8	amp	rim	f	44.51	0.8	8.94	19.51	9.49	0.5	11.91	1.18	0.9			0.08		97.82
8-5-8	amp	mid	g	42.46	1.34	11.76	19.15	7.68	0.44	13.38	1.14	0.89	0.03		0.09		98.36
8-5-8	bte	rim	a	37.48	3.04	15.13	21.85	9.71	0.35	0.03	0.15	9.42	0.03	0.04	0.03	0.31	97.57
8-5-8	bte	core	a	36.49	3.13	14.74	21.99	9.75	0.32	0.01	0.14	9.37	0.04	0.04			96.02
8-5-8	bte	rim	a	36.99	2.85	15.22	21.35	9.57	0.35	0.08	0.12	9.37		0.04	0.02	0.13	96.09
8-5-8	sph	rim	a	31.14	37.98	1.74	0.9	0.03	0.09	27.51	0.05			0.27	0.04	0.36	100.11
8-5-8	sph	core	a	30.79	37.86	1.36	1.13	0.03	0.14	27.18	0.04			0.21	0.08		98.82
8-5-8	sph	rim	a	31.24	37.74	2.04	1.12	0.03	0.1	27.57	0.07	0.02		0.24	0.05	0.34	100.56
Note: Analyses by Maasaki Shimizu Using a Jeol 733 at University of Tokyo
Mineral abbreviations: Plag=plagioclase; Ksp=alkai feldspar; Amp=amphibole; Bte=biotite; Chl=chlorite; Mu=muscovite; Sph=sphene; Mt=magnetite;
Ilm=ilmenite; Ed=epidote; Px=pyroxene
%Ab,%An, %Or = plagioclase composition calculated from cation proportions.
